# Supplementary material for: Changing trends in suicide rates in South Korea from 1993 to 2016: a descriptive study
Source: PubMed Central journal article supplement — BMJ Open. 2018 Sep 28;8(9):e023144. doi: 10.1136/bmjopen-2018-023144 (PMC6169778; doi:10.1136/bmjopen-2018-023144), 2018-09-28
Supplement: bmjopen-2018-023144.draft_revisions.pdf [file bmjopen-2018-023144.draft_revisions.pdf]

# BMJ Open

BMJ Open is committed to open peer review. As part of this commitment we make the peer review history of every article we publish publicly available.

When an article is published we post the peer reviewers' comments and the authors' responses online. We also post the versions of the paper that were used during peer review. These are the versions that the peer review comments apply to.

The versions of the paper that follow are the versions that were submitted during the peer review process. They are not the versions of record or the final published versions. They should not be cited or distributed as the published version of this manuscript.

BMJ Open is an open access journal and the full, final, typeset and author-corrected version of record of the manuscript is available on our site with no access controls, subscription charges or pay-per-view fees (<http://bmjopen.bmj.com>).

If you have any questions on BMJ Open's open peer review process please email [info.bmjopen@bmj.com](mailto:info.bmjopen@bmj.com)

# BMJ Open

## Changing trends in suicide rates in South Korea from 1993 to 2016

|                               |                                                                                                                                                                                                                                                                                                                                                                                                                                                             |
|-------------------------------|-------------------------------------------------------------------------------------------------------------------------------------------------------------------------------------------------------------------------------------------------------------------------------------------------------------------------------------------------------------------------------------------------------------------------------------------------------------|
| Journal:                      | <i>BMJ Open</i>                                                                                                                                                                                                                                                                                                                                                                                                                                             |
| Manuscript ID                 | bmjopen-2018-023144                                                                                                                                                                                                                                                                                                                                                                                                                                         |
| Article Type:                 | Research                                                                                                                                                                                                                                                                                                                                                                                                                                                    |
| Date Submitted by the Author: | 23-Mar-2018                                                                                                                                                                                                                                                                                                                                                                                                                                                 |
| Complete List of Authors:     | Lee, Sang Uk; National Center for Mental Health, Mental Health Research Park, Jong-Ik; Kangwon National University School of Medicine, Department of Psychiatry<br>Lee, Soojung; Kyungnam University, Department of Nursing<br>Oh, In-Hwan; Kyung Hee University, Department of Preventive Medicine<br>Choi, Joong-Myung ; Kyung Hee University, Department of Preventive Medicine<br>Oh, Chang-Mo; Kyung Hee University, Department of Preventive Medicine |
| Keywords:                     | Suicide & self-harm < PSYCHIATRY, Mortality, Social and political issues, Prevention, Republic of Korea                                                                                                                                                                                                                                                                                                                                                     |
|                               |                                                                                                                                                                                                                                                                                                                                                                                                                                                             |

SCHOLARONE™  
Manuscripts

Peer Review Only

# Changing trends in suicide rates in South Korea from 1993 to 2016

Running title: Trends in suicide in South Korea

Sang-Uk Lee<sup>1,2</sup>, Jong-Ik Park<sup>3</sup>, Soojung Lee<sup>4</sup>, In-Hwan Oh<sup>2</sup>, Joong-Myung Choi<sup>2</sup>, Chang-Mo Oh<sup>2\*</sup>

<sup>1</sup>Department of Mental Health Research, National Center for Mental Health, Seoul, Republic of Korea

<sup>2</sup>Department of Preventive Medicine, School of Medicine, Kyung Hee University, Seoul, Republic of Korea

<sup>3</sup>Department of Psychiatry, Kangwon National University School of Medicine, Chunchon, Republic of Korea

<sup>4</sup> Department of Nursing, Kyungnam University, Changwon, Republic of Korea

**Corresponding author:** Chang-Mo Oh, MD, PhD

Department of Preventive Medicine, School of Medicine, Kyung Hee University,  
Kyungheedae-ro, Dongdaemun-gu, Seoul, 02447, Republic of Korea

Tel: +82-2-961-2265 Fax: +82-969-0792

E-mail: kachas@naver.com

**Word count:** 3,682

## Abstract

**Objectives:** South Korean government has recently implemented policies to prevent suicide. However, there were few studies examining the recent changing trend in suicide rates. This study aims to examine the changing trend in suicide rates by time and age group.

**Design:** A descriptive study using nationwide mortality rates

**Setting:** Data on the nationwide cause of death from 1993 to 2016 were obtained from the Statistics Korea.

**Participants:** People living in the South Korea

**Interventions:** Implementation of national suicide prevention policies (1<sup>st</sup>: 2004 year, 2<sup>nd</sup>: 2009 year)

**Primary outcome measures:** Suicide was defined as “X60-X84” code according to the ICD-10 code. Age-standardized suicide rates were estimated, and a Joinpoint regression model was applied to describe the trends in suicide rate.

**Results:** Since 2010, the suicide rates in South Korea have been decreasing by 5.5% (95% CI: -10.3% to -0.5%) annually. In terms of sex, the suicide rate for men had increased by 5.0% (95% CI: 3.6% to 6.4%) annually until 2010. However, there has been no statistically significant change since 2010. For women, the suicide rate had increased by 7.5% (95% CI: 6.3% to 8.7%) annually until 2009, but since 2009, the suicide rate has been significantly decreasing by 6.1% (95% CI: -9.1% to -3.0%) annually. In terms of the age group, the suicide rates among women of almost all age groups have been decreasing since 2010; however, the suicide rates of men aged between 30 and 49 years showed continuously increasing trends.

**Conclusion:** Our results showed that there were differences in the changing trends in suicide rate by sex and age groups. It was closely related to the timing of the implementation of national suicide prevention policies. Further specific suicide prevention programs targeting

1  
2  
3  
4  
5  
6  
7  
8  
9  
10  
11  
12  
13  
14  
15  
16  
17  
18  
19  
20  
21  
22  
23  
24  
25  
26  
27  
28  
29  
30  
31  
32  
33  
34  
35  
36  
37  
38  
39  
40  
41  
42  
43  
44  
45  
46  
47  
48  
49  
50  
51  
52  
53  
54  
55  
56  
57  
58  
59  
60

middle-aged men are required.

**Keywords:** Suicide; Mortality; Social and political issues; Prevention; Republic of Korea

For peer review only

## Article Summary

### Strengths and limitations of this study

- Our findings show that efforts to reduce suicide at the national level can actually lead to a decline in suicide rates through natural experiment.
- Another finding of our study is that suicide rates in middle-age men are continuing to increase, suggesting that a different suicide prevention strategy may be necessary in South Korea.
- Because this study is a descriptive epidemiologic study, it is difficult to know exactly which policies have reduced suicide rates in which age group.
- Improved accuracy of statistics on the causes of death may affect to changes in suicide rates.

## Introduction

Suicide is a major public health issue, with an estimated 788,000 deaths every year according to the World Health Organization (WHO) statistics.<sup>1</sup> The WHO established the Mental Health Action 2013-2020 plan to implement a national, multi-sectorial promotion and prevention program for promoting mental health and reducing suicide rates of each country by 10% until 2020.<sup>2</sup> Especially, the developed countries in East Asia have relatively high mortality rates due to suicide.<sup>3</sup> Among these countries, suicide in South Korea is a serious health problem because the suicide rate in South Korea in 2013 (28.5 per 100,000 person-years) was 2.4 times higher than the average suicide rates of other Organization for Economic Co-operation and Development (OECD) countries and South Korea has been ranked top among the OECD countries in terms of suicide rates in the last 10 years.<sup>4</sup> In addition, suicide was the most common cause of death in young people aged between 10 and 39 years, and it was the second-most common cause of death among middle-aged adults aged 40-59 years in 2016 in South Korea.<sup>5</sup>

South Korea implemented the national suicide prevention program in the early 2000s.<sup>6</sup> This national suicide prevention program includes both high-risk group-oriented monitoring and prevention of suicide and suicide prevention program for general population such as media campaign.<sup>7</sup> However, there was a few studies to examine the trends in suicide rates by sex and age group with regard to the national suicide prevention policies in South Korea. Therefore, this study aimed to describe the changing trends in suicide rate by sex and age group in South Korea and exploring the potential effects of implementation of the national suicide prevention policies.

## Method

### ***Study participants***

The cause of death statistics is a reliable source of data on how the causes of death have changed because of socioeconomic changes and public health developments; it also provides comprehensive information to plan and prioritize health care policies. The number of deaths due to suicide and the corresponding mid-year population counts from 1993 to 2016 were obtained from Statistic Korea (Available from <http://kosis.kr/>). The Statistic Korea used the estimated population as the denominator for mortality rates before year 1993. After 1993, Statistic Korea used the mid-year population based on resident registration number as the denominator for mortality rates. In addition, the cause of death data before 1993 is less accurate, therefore, we selected the suicide rates from 1993 to 2016. The code assigned to the cause of death due to suicide was “X60-X84” according to the ICD-10 code.

### ***National suicide prevention program***

Information regarding the timing and implementation of the national suicide prevention policy in South Korea were obtained from relevant government data and expert consultants. Initially, the timing and details of the national suicide prevention policy were obtained from the national knowledge information system (<https://nkis.re.kr:4445/main.do>) and publications from Korea Suicide Prevention Center.<sup>7-10</sup> The contents and details obtained from these websites were confirmed after review by the experts and staffs of Korea Suicide Prevention Center.<sup>6-12</sup>

### ***Ethics statement***

The study protocol was reviewed by the Institutional Review Board of Kyung Hee University (IRB No.KHSIRB-17-086). Our study was exempted from review because it was



1  
2  
3  
4 not an experimental trial, which required contacting the patients, and our study did not  
5  
6 include personal identifiable information.  
7  
8  
9

### 10 *Statistical analysis*

11  
12 To describe the baseline characteristics of people who die due to suicide, the number of  
13  
14 deaths was presented for each 6-year period (1993-1998/1999-2004/2005-2010/2011-2016)  
15  
16 from 1993 to 2016. Chi-square test was used to test the differences in the distribution of death  
17  
18 due to suicide by sex and age groups. To describe the changes in suicide rates by time period,  
19  
20 the age-standardized suicide rates of suicide were calculated. The mid-year Korean  
21  
22 population in 2005 was used as the standard population for age-standardized suicide rates.  
23  
24 Age-specific suicide rates were applied to the corresponding 5-year age group of the standard  
25  
26 population. The sum of expected deaths for each 5-year age group was calculated, and the  
27  
28 age-standardized suicide rates were calculated by dividing the sum of expected deaths by the  
29  
30 total number of standard population. Joinpoint regression modelling was used to test the  
31  
32 trends in age-standardized suicide rates for suicide and detect significant changes over time to  
33  
34 fit a better multi-segmented model compared to a simple linear model.<sup>13</sup> The trends in rates  
35  
36 were summarized as annual percentage changes (APCs) and their 95% confidence intervals  
37  
38 (CIs).  
39  
40  
41  
42

43 *P* values <0.05 were considered statistically significant. We used SPSS (version 23.0,  
44  
45 Armonk, NY: IBM Corp., USA) and R software (version 3.1.1, Vienna, Austria) and  
46  
47 Joinpoint Regression Program software (Version 4.1.1, Statistical Methodology and  
48  
49 Applications Branch, Surveillance Research Program, National Cancer Institute, Bethesda,  
50  
51 MD, USA).  
52  
53  
54

## Results

### *Baseline characteristics*

The total number of deaths in South Korea from 1993 to 2016 was 6,007,678 (Table 1). Of these, the total number of deaths due to suicide was 249,085 (4.1%). Of the deaths due to suicide, 169,963 (68.2%) were men, and 79,122 (31.8%) were women. In terms of the time period, South Korea had the highest number of deaths from suicide (n=15,906) and the highest age-standardized suicide rate from suicide (29.1 per 100,000 person-year) in 2011 (Supplementary Table 1). After 2011, the number of deaths and suicide rates due to suicide decreased until 2016. The number of deaths due to suicide in 2011-2016 was 2.5 times higher than that in 1993-1998. According to the age groups, the proportion of deaths due to suicide in children and adolescents aged between 0 and 19 years had decreased from 1993-1998 to 2011-2016, whereas the proportion of elderly aged more than 70 years had increased during the same time period ( $p<0.01$ ).

### *Trends in suicide rates*

According to the joinpoint regression model, the mortality rate from suicide had increased by 5.6% (95% CI: 4.4% to 6.9%) annually from 1993 to 2010 (Figure 1). After 2010, the suicide rate had declined by 5.5% (95% CI: -10.3% to -0.5%) annually until 2016. In terms of sex, suicide rate for men had increased by 5.0% (95% CI: 3.6% to 6.4%) annually from 1993 to 2010. After 2010, suicide rate for men shown decreasing trends (APC=-4.3%, 95% CI: -9.8% to 1.6%), although it was not statistically significant ( $p=0.14$ ). Similarly, the suicide rates for women had increased by 7.5% (95% CI: 6.3% to 8.7%) annually from 1993 to 2009.

1  
2  
3  
4 Following that, suicide rates for women showed a significant decreasing trend (APC=-6.1%,  
5 (95% CI: -9.1% to -3.0%)).  
6  
7  
8  
9

### 10 ***Trends in suicide rates for men by age group***

11  
12 Joinpoint regression analysis was performed by sex and age group. Suicide rates for men  
13 increased with age (Table 2). The suicide rate of adolescents aged 10-19 years is relatively  
14 low, ranging from 3 to 7 people per 100,000 persons. The suicide rate of adolescents aged 10-  
15 19 years has been increasing annually by 2.8% since 2001. Although there was no statistically  
16 significant change in suicide rate of young adults aged 20-29 years, the rates showed  
17 increasing trends from 2006 to 2010, and it has tended to decrease since 2010. The suicide  
18 rate of men aged 30-39 years showed a significant annual increase of 3.1% from 1993 to  
19 2016. For men aged 40-49 years, the suicide rate dramatically increased by 15.6% annually  
20 from 1993 to 1998. Since 1998, the increasing trend in the suicide rate has attenuated among  
21 men aged 40-49 years (APC=1.9% (95% CI: 0.9% to 2.9%)). The suicide rate for men aged  
22 50-59 years has increased by 8.0% from 1993 to 2004. However, there has been no  
23 significant increase since 2004. For men aged 60-69 years, there was a statistically significant  
24 increase in suicide rate by 10.7% increase each year between 1993 and 2005; however, there  
25 has been a decreasing trend since 2005. The suicide rate for men aged 70-79 years had  
26 increased by 12.9% annually from 1993 to 2004 but has been decreasing by 7.5% annually  
27 since 2011. For men aged 80 years and above, the suicide rate had increased by 9.2%  
28 annually between 1993 and 2000. There was no significant change in the suicide rate for men  
29 from 2000 to 2010. Since 2010, the suicide rate has been decreasing by 6.2% annually.  
30  
31  
32  
33  
34  
35  
36  
37  
38  
39  
40  
41  
42  
43  
44  
45  
46  
47  
48  
49  
50  
51  
52

### 53 ***Trends in suicide rates for women by age group***

1  
2  
3  
4 Table 3 shows the suicide rate for women by age group. The suicide rate of adolescents  
5 aged 10-19 years is relatively low, and the trends of suicide rates are similar to that in the  
6 twenties. Suicide rates in women aged 20-29 years had increased by 20.0% annually from  
7 2001 to 2008. Since 2008, suicide rate for women aged 20-29 years has decreased by 9.5%  
8 annually. The suicide rate of women aged 30-39 years showed a significant annual increase of  
9 5.0% from 1993 to 2006, whereas the suicide rates tended to decrease by 5.9% annually from  
10 2009 to 2016. For women aged 40-49 years, the suicide rate had increased by 6.5% annually  
11 from 1993 to 2010. Since 2010, there was no significant change in the suicide rate. The  
12 suicide rate for women aged 50-59 years had increased by 6.6% from 1993 to 2010. After  
13 2010, the suicide rates for women aged 50-59 years showed a decreasing trend (APC=-5.5%  
14 (95% CI: -8.6% to 0.0%)). For women aged 60-69 years, there was a statistically significant  
15 increase in the suicide rate with 9.4% increase each year from 1993 to 2005; however, there  
16 has been a significant decreasing trend since 2010 (APC=-8.7% (95% CI: -11.9% to -5.5%)).  
17 The suicide rate for women aged 70-79 years increased by 13.5% annually from 1993 to 2004  
18 but has decreased significantly by 9.9% annually since 2011. For women aged 80 years and  
19 above, the suicide rates had dramatically increased by 18.0% annually from 1993 to 2004.  
20 There was no significant change from 2004 to 2011. Since 2011, suicide rate has decreased  
21 by 11.5% annually.  
22  
23  
24  
25  
26  
27  
28  
29  
30  
31  
32  
33  
34  
35  
36  
37  
38  
39  
40  
41  
42  
43  
44

### ***The implementation of the National Suicide Prevention Program in South Korea***

45  
46  
47 The first step of the national suicide prevention program was the establishment of the first  
48 5-year National Strategy for Suicide Prevention in 2004 (Figure 2). Based on this, a suicide  
49 prevention program was introduced in 2005 at regional mental health centres which were  
50 public community infrastructures for mental health. Following this, the second 5-year  
51  
52  
53  
54

1  
2  
3  
4 National Strategy for Suicide Prevention was implemented in 2009. Based on this program, a  
5  
6 separate budget was newly proposed and executed. In 2010, the government established the  
7  
8 integrated welfare system to reduce redundant welfare services and expand the basic living  
9  
10 subsidies. Indeed, the welfare budget in South Korea was increased by 72%, welfare  
11  
12 receivers were increased by 157.6%, and additional 7,000 welfare officers of local  
13  
14 government had increased from 2006 to 2011. In 2010, a screen door was expanded to  
15  
16 prevent suicide on the subway. In 2011, the Act for the Prevention of Suicide was passed, the  
17  
18 Korea Suicide Prevention Center was established, and the sales of paraquat pesticides were  
19  
20 prohibited. The Act for the Prevention of Suicide was enforced in 2012, and the Korean  
21  
22 gatekeeper training program for suicide prevention entitled '*watch, listen, and speak*' was  
23  
24 introduced to the general population in South Korea. In 2013, an emergency department-  
25  
26 based suicide attempt survivor management program was implemented, and the Korea  
27  
28 Suicide Prevention Center along with Journalists Association of Korea announced the  
29  
30 recommendation for media reporting of suicide. In addition, the government authenticated the  
31  
32 private suicide prevention program to disseminate the evidence-based suicide prevention  
33  
34 program. In 2014, the government collaborated with religious organizations to increase the  
35  
36 participation rates of general population in the national suicide program. The Korea  
37  
38 Psychological Autopsy Center was established to understand the causes of suicide deaths  
39  
40 better. In 2015, the '*Are you okay*' media campaign as one of the suicide prevention programs  
41  
42 was conducted. In 2016, a comprehensive plan for mental health was established by the  
43  
44 cooperation of many Ministries of government, and an '*Air Kiss*' campaign, in which famous  
45  
46 celebrities participated, was conducted through social network services.  
47  
48  
49  
50  
51  
52  
53  
54  
55  
56  
57  
58  
59  
60

## Discussion

This study aimed to examine the trends of suicide rate in South Korea by sex and age group and explore these suicide rate changes according to the timing of suicide prevention policies implemented by the Korean government. This study found that the overall suicide rate in South Korea had tended to decline since 2010. However, when analysed by sex and age, the suicide rate trends showed differences according to the sex and age groups. While women's suicide rate has decreased in all age groups since 2010, the suicide rate of middle-aged men aged between 30 and 49 years is still on the rise. Our findings were consistent with the study findings of Matsubayashi et al.<sup>14</sup> They showed that a national level of suicide prevention intervention was effective way to reduce suicide rate except for working-age adults in 21 OECD countries.<sup>14</sup>

### *Trend in suicide rate after 2004/2005*

From 1993 to 2016, the suicide rates tended to change at two points in time. First, this study found that the suicide rate changed before and after 2004 and 2005. It was revealed that after 2004, an increase in the suicide rate of men and women aged 60 years or older had changed. After 2005, the suicide rate of men in their 60s decreased by 3.6% each year and that of women in their 60s, which had risen sharply up until 2005, no longer showed a statistically significant increase from 2005 to 2010.

During this period, Korea's 1<sup>st</sup> national suicide prevention initiative was implemented in 2004, which included various programs such as mental health improvement and suicide prevention, suicide prevention counseling calls, the development of a culture that respects life, treatment and post-suicide attempt management for those who attempt suicide, and suicide prevention research.<sup>12</sup> In addition, the Mental Health Welfare Center, a national mental health

1  
2  
3  
4 system, also implemented a regional suicide prevention program in 2005, and the Seoul  
5  
6 Suicide Prevention Center was first established.<sup>15</sup> To identify the reason for the changes in  
7  
8 the suicide rate being observed mainly among those aged 60 years or older since the 1<sup>st</sup>  
9  
10 suicide prevention initiative was put into practice, the following should be considered. To  
11  
12 begin with, the government did not earmark funding for the 1<sup>st</sup> suicide prevention initiative.<sup>16</sup>  
13  
14 For this reason, it is difficult to find the data that can precisely identify the programs that  
15  
16 were actually implemented among various other programs. Nonetheless, a suicide prevention  
17  
18 program implemented by the Mental Health Welfare Center mainly focused on management  
19  
20 via phone calls, and it has been applied since 2005 without additional funding. Previous  
21  
22 studies reported that interventions and management based on phone calls were effective for  
23  
24 the suicide prevention of the elderly,<sup>17,18</sup> and in this regard, changes in the suicide rate mostly  
25  
26 found among those aged 60 years or older can be attributed to the effect of phone-based  
27  
28 interventions.<sup>19</sup> These changes in the suicide rate, however, were found to be not a  
29  
30 statistically significant decline in the suicide rate overall but a change in the increasing trend  
31  
32 of the suicide rate.  
33  
34  
35  
36  
37

### 38 ***Trend in suicide rate after 2008/2009***

39  
40 Second, the suicide rate began to decline from 2008 to 2011. As of 2008 and 2009, the  
41  
42 suicide rate for females aged 10 to 39 years, which had increased before, began to decrease.  
43  
44 As of 2010 and 2011, the suicide rate of women aged 40 years or older also began to decline.  
45  
46 Furthermore, the suicide rates of men in their 20s and those aged 70 years or older tended to  
47  
48 decline since 2010 and 2011, respectively. In contrast, the suicide rate of men aged 30-49  
49  
50 years had not decreased significantly from 1993 to 2016; instead, it continued to rise during  
51  
52 this period.  
53  
54

1  
2  
3  
4 To begin with, the 2<sup>nd</sup> national suicide prevention initiative was enacted in 2009, which  
5  
6 consisted of the research and development of suicide prevention policy, development of a  
7  
8 culture that respects life, suicide prevention training and nurturing of specialists, online  
9  
10 counselling and harmful suicide information monitoring, and public-private partnerships for  
11  
12 suicide prevention.<sup>12</sup> The importance of the 2<sup>nd</sup> suicide prevention initiative is that the  
13  
14 national budget was allocated for suicide prevention unlike the 1<sup>st</sup> suicide prevention  
15  
16 initiative. While this initiative could be effective in reducing the suicide rate of young  
17  
18 females in their 10s to 30s, it would be more reasonable to consider that a series of specific  
19  
20 events contributed to a surge in the suicide rate of young women in 2008 and 2009. The  
21  
22 effect of a celebrity's suicide on the suicide rate is well-known,<sup>20, 21</sup> and there were incidents  
23  
24 of suicides among very high-profile celebrities in 2008 and 2009 in South Korea, which were  
25  
26 reported across the country.<sup>7</sup> Furthermore, it was reported that the effect of a celebrity's  
27  
28 suicide in Korea was five times higher among young women.<sup>22</sup> Considering these results, it is  
29  
30 a reasonable interpretation to view a reduction in the suicide rate of young women after 2009  
31  
32 as a decline in the suicide rate surged previously due to the effect of a series of specific  
33  
34 events—celebrity suicides.  
35  
36  
37

38 While it did not directly address suicide prevention, one of the programs implemented in  
39  
40 2010 was the establishment of an integrated welfare system to increase the number of  
41  
42 recipients eligible for National Basic Livelihood Security, and the access to welfare programs  
43  
44 was expanded in 2011 by increasing the number of welfare service worker.<sup>11</sup> Economically  
45  
46 vulnerable groups have been known to be at a high risk of suicide,<sup>23</sup> and more notably, the  
47  
48 poverty rate of the elderly in Korea was reported to be particularly high.<sup>24</sup> From this  
49  
50 perspective, it is suggested that the expansion of the welfare system would have had a  
51  
52 positive effect on reducing the suicide rate. In addition, some important national suicide  
53  
54



1  
2  
3  
4 prevention activities were carried out during the same period, such as the installation of more  
5  
6 screen doors to prevent people from throwing themselves into the subway train<sup>25</sup> and  
7  
8 Enactment of Act for the Prevention of Suicide and a ban on the sale of paraquat pesticides.<sup>26</sup>  
9  
10 Such government-led suicide prevention interventions may have contributed to the changes in  
11  
12 the suicide rate of men in their 20s, men aged 70 years or older, and women aged 40 years or  
13  
14 older in 2010 and 2011. Moreover, a continuous decrease in the suicide rate since 2011  
15  
16 indicates that the reduction of suicide rates was attributable to the government intervention  
17  
18 efforts. Following this, the Korean government launched a Korean gatekeeper training  
19  
20 program (*'watch, listen, and speak'*) in 2012,<sup>6</sup> which trained people in Korea about being a  
21  
22 suicide gatekeeper; in 2013, the government implemented an emergency department-based  
23  
24 suicide attempt survivor management program, announced the recommendation for media  
25  
26 reporting of suicide, and established a suicide prevention certification system for a more  
27  
28 efficient implementation of suicide prevention programs.<sup>7</sup> In 2014, the government  
29  
30 introduced suicide prevention programs in cooperation with the religious community and  
31  
32 established the Korea Psychological Autopsy Center to better identify the cause of suicide.<sup>8</sup>  
33  
34 In 2015, the government launched the *'Are You Okay'* campaign to raise public awareness  
35  
36 across the country.<sup>9</sup> In 2016, not just the Ministry of Health and Welfare but all Ministries in  
37  
38 Korea cooperated and established the Comprehensive Plan for Mental Health and promoted  
39  
40 the *'Air Kiss'* campaign, which included celebrities.<sup>10</sup>  
41  
42  
43  
44  
45  
46

### 47 ***Increase in suicide rate of middle-aged men***

48  
49 Nevertheless, it was found that the suicide rate of middle-aged men in their 30s and 40s  
50  
51 had continued to increase significantly from 1993 to 2016. While there was a slight  
52  
53 slowdown in the increase of their suicide rate due to suicide prevention programs  
54  
55

1  
2  
3  
4 implemented by the government, it did not result in a decrease in the suicide rate. This might  
5  
6 suggest that the currently implemented suicide prevention programs are not effective for men  
7  
8 in their 30s and 40s. However, in Korea, suicide prevention policies focused on middle-aged  
9  
10 men have not been implemented until now. In previous studies, men were reported to have a  
11  
12 higher risk of suicide due to financial reasons than women do,<sup>23</sup> and the risk of suicide among  
13  
14 men arising due to the unemployment rate and economic crisis was also shown to be higher.<sup>27</sup>  
15  
16  
17 <sup>28</sup> In Japan, a loan system for financial independence was implemented by suicide prevention  
18  
19 policy, and the suicide rate of males in their 30s and 40s has decreased.<sup>12, 29</sup> It may be  
20  
21 considered to be as a result of the policy. However, the current suicide prevention policies  
22  
23 only included the development of an office worker gatekeeper program for men in their 30s  
24  
25 and 40s. In this regard, to fundamentally address the issue of suicide among men in their 30s  
26  
27 and 40s, the Korean government should implement multi ministry-driven policies that include  
28  
29 social and financial bases such as social security system and unemployment-related  
30  
31 assistance system with various suicide prevention policies.  
32  
33  
34  
35

### 36 ***Strengths and Limitations of this study***

37  
38 When interpreting the findings of this study, the following limitations need to be  
39  
40 considered. This study did not take account of the individual effect of a suicide prevention  
41  
42 program; it instead interpreted the changes in suicide rates at each point in time when such  
43  
44 programs were implemented. However, we cannot confirm when exactly the effect of policy  
45  
46 was seen. This was because the data on the outcome of each individual suicide prevention  
47  
48 program were not available as Korea did not have a monitoring system for each individual  
49  
50 program, even though it implemented suicide prevention programs quite extensively. In this  
51  
52 regard, a monitoring system needs to be established in order to identify the policy effect on  
53  
54

1  
2  
3  
4 the changes in the suicide rate in Korea more accurately, and a follow-up study needs to be  
5  
6 conducted using this system. Furthermore, the accuracy of the cause of death statistics had  
7  
8 continued to improve, so there is a chance that an increase in the number of deaths due to  
9  
10 suicide would have been affected by the improved accuracy of statistics on the causes of  
11  
12 death. Despite these limitations, this study has the following strengths. This study presented  
13  
14 the trends in the suicide rates in Korea based on statistical analysis of a 24-year period. In  
15  
16 addition, it showed that the point in time wherein such changes in the suicide rate occurred  
17  
18 coincided with that wherein the government-led suicide prevention programs were  
19  
20 implemented. Accordingly, further government-level investments and interventions should be  
21  
22 considered to reduce the suicide rate.  
23  
24  
25  
26

## 27 **Conclusion**

28  
29 This study showed that the suicide rate among Korean men and women has decreased  
30  
31 since 2010, based on the causes of death statistics, which could represent the general  
32  
33 population of South Korea. Our findings also showed that there were significant changes in  
34  
35 trends Korea's suicide rate after 2004 to 2005 and 2008 to 2011. These changes in suicide  
36  
37 rate coincided with those when the 1<sup>st</sup> suicide prevention initiative was implemented in 2004  
38  
39 and the 2<sup>nd</sup> suicide prevention initiative enacted in 2009. In this regard, it is considered that  
40  
41 government-level suicide prevention interventions had a potential effect on decreasing the  
42  
43 suicide rate, and national-level efforts are still needed in the future to reduce the increasing  
44  
45 suicide rate of middle-aged men in their 30s and 40s.  
46  
47  
48  
49

## 50 **Author contributions**

1  
2  
3  
4 S-U Lee obtained, analysed the data and wrote the manuscript and J-I P, S Lee, I-H Oh and  
5  
6 J-M Choi interpreted the data and contributed to revise the manuscript. C-M Oh made the  
7  
8 research design and revised the manuscript.  
9

### 10 11 12 **Funding sources**

13  
14 This work was supported by a grant from Kyung Hee University in 2017 (grant: KHU-  
15  
16 20170835).  
17  
18

### 19 20 21 **Conflicts of interests**

22  
23 On behalf of all the authors, the corresponding author declares that there are no conflicts of  
24  
25 interests.  
26  
27

### 28 29 30 **Patient consent**

31  
32 This study was a descriptive epidemiologic study using the cause of death database that  
33  
34 could not identify individuals. Therefore, patient consent form was exempted from IRB.  
35  
36

### 37 38 39 **Acknowledgments**

40  
41 All authors participated in the design, execution, and analysis of the results and have read  
42  
43 and approved the final version. We are especially thankful for the advice and help of the  
44  
45 staffs and colleagues of the Korea Suicide Prevention Center.  
46  
47

### 48 49 50 **Ethical Standards**

51  
52 The study protocol was reviewed and approved by Institutional Review Board of Kyung  
53  
54 Hee University (IRB No. KHSIRB-17-086).  
55

### Data sharing statement

All data used in this study can be obtained from Homepage of Statistic Korea (<http://kosis.kr/eng/>).

### REFERENCES

1. World Health Organisation. Suicide Data.  
[http://www.who.int/mental\\_health/prevention/suicide](http://www.who.int/mental_health/prevention/suicide). (Accessed on 14 September 2017).
2. World Health Organisation. Mental health action plan 2013–2020.  
[http://www.who.int/mental\\_health/publications/action\\_plan/en/](http://www.who.int/mental_health/publications/action_plan/en/). (Accessed on 14 September 2017).
3. Hendin H, Phillips MR, Vijayakumar L, Pirkis J, Wang H, Yip P, Wasserman D, Bertolote JM, Fleischmann A. Suicide and suicide prevention in Asia. World Health Organization: Geneva, 2018.
4. Organization for Economic Co-operation and Development. OECD health data 2016.  
<https://data.oecd.org/healthstat/suicide-rates.htm>. (Accessed on 14 September 2017).
5. Statistics Korea. Cause-of-Death Statistics 2017. <http://kosis.kr/en>. (Accessed on 14 September 2017).
6. Paik JW, Jo SJ, Lee S, Ong JY, Park JI. The Effect of Korean Standardized Suicide

- 1  
2  
3  
4 Prevention Program on Intervention by Gatekeepers. J Korean Neuropsychiatr Assoc  
5  
6 2014;53:358-363. [In Korean].  
7
- 8 7. Korea Suicide Prevention Center. Suicide White Book. Seoul: Ministry of Health and  
9  
10 Welfare, 2014 [In Korean].  
11
- 12 8. Korea Suicide Prevention Center. Suicide White Book. Seoul: Ministry of Health and  
13  
14 Welfare, 2015 [In Korean].  
15
- 16 9. Korea Suicide Prevention Center. Suicide White Book. Seoul: Ministry of Health and  
17  
18 Welfare, 2016 [In Korean].  
19
- 20 10. Korea Suicide Prevention Center Suicide White Book. Seoul: Ministry of Health and  
21  
22 Welfare, 2017 [In Korean].  
23
- 24 11. Kang HG. Social Welfare Delivery Reform: Achievements and Beyond, Health and  
25  
26 Welfare Policy Forum 2012;4:35-49  
27
- 28 12. Lee SY. Policy options for the improvement of suicide prevention programs. Health and  
29  
30 Welfare Policy Forum 2015;4:34-49.  
31
- 32 13. Kim HJ, Fay MP, Feuer EJ, Midthune DN. Permutation tests for joinpoint regression with  
33  
34 applications to cancer rates. Stat Med 2000;19:335-351.  
35
- 36 14. Matsubayashi T, Ueda M. The effect of national suicide prevention programs on suicide  
37  
38 rates in 21 OECD nations. Soc Sci Med 2011;73:1395-400.  
39
- 40 15. National Mental Health and Welfare Commission. Guidelines for mental health services,  
41  
42 Seoul: Ministry of Health and Welfare 2005 [In Korean].  
43
- 44 16. Park JI, Nam YY, Lee HK, Park JY, Lee MS, Lee SJ. National suicide prevention plan.  
45  
46 Seoul: Ministry of Health and Welfare, 2011 [In Korean].  
47
- 48 17. De Leo D, Buono MD, Dwyer J. Suicide among the elderly: the long-term impact of a  
49  
50 telephone support and assessment intervention in northern Italy. Br J Psychiatry  
51  
52  
53  
54

- 2002;181: 226-9.
18. De Leo D, Carollo G, Buono MD. Lower suicide rates associated with a Tele-Help/Tele-Check service for the elderly at home. *Am J Psychiatry* 1995;152: 632-4.
19. Sun HJ. Suicide prevention efforts for the elderly in Korea. *Perspect Public Health* 2016;136:269-70.
20. Jeong J, Shin SD, Kim H, Hong YC, Hwang SS, Lee EJ. The effects of celebrity suicide on copycat suicide attempt: a multi-center observational study. *Soc Psychiatry Psychiatr Epidemiol* 2012;47:957-65.
21. Niederkrotenthaler T, Fu KW, Yip PS, Fong DY, Stack S, Cheng Q, Pirkis J. Changes in suicide rates following media reports on celebrity suicide: a meta-analysis. *J Epidemiol Community Health* 2012;66:1037-42.
22. Ju Ji N, Young Lee W, Seok Noh M, Yip PS. The impact of indiscriminate media coverage of a celebrity suicide on a society with a high suicide rate: epidemiological findings on copycat suicides from South Korea. *J Affect Disord* 2014;156:56-61.
23. Lee SU, Oh IH, Jeon HJ, Roh S. Suicide rates across income levels: Retrospective cohort data on 1 million participants collected between 2003 and 2013 in South Korea. *J Epidemiol* 2017;27:258-64.
24. Jin JM., Kim SY, Moon KJ. A Study on The Poverty and The Effect of Income Transfer of Elderly-Headed Households in Korea: Focused on Poverty Rate, Poverty Gap and Income Transfer. *Social Welfare Policy* 2014;41:239-58.
25. Chung YW, Kang SJ, Matsubayashi T, Sawada Y, Ueda M. The effectiveness of platform screen doors for the prevention of subway suicides in South Korea. *J Affect Disord*. 2016 ;194:80-3.
26. Cha ES, Chang SS, Gunnell D, Eddleston M, Khang YH, Lee WJ. Impact of paraquat

- 1  
2  
3  
4 regulation on suicide in South Korea. *Int J Epidemiol* 2015;45:470-9.  
5  
6 27. Chang SS, Gunnell D, Sterne JA, Lu TH, Cheng AT. Was the economic crisis 1997–1998  
7  
8 responsible for rising suicide rates in East/Southeast Asia? A time–trend analysis for  
9  
10 Japan, Hong Kong, South Korea, Taiwan, Singapore and Thailand. *Soc Sci Med.*  
11  
12 2009;68:1322-31.  
13  
14 28. Hawton K, Arensman E, Wasserman D, Hulten A, Bille-Brahe U, Bjerke T, Crepet P,  
15  
16 Deisenhammer E, Kerkhof A, De Leo D, Michel K, Ostamo A, Philippe A, Querejeta I,  
17  
18 Salander-Renberg E, Schmidtke A, Temesváry B. Relation between attempted suicide  
19  
20 and suicide rates among young people in Europe. *J Epidemiol Community Health*  
21  
22 1998;52:191-4  
23  
24  
25 29. Takeshima T, Yamauchi T, Inagaki M, Kodaka M, Matsumoto T, Kawano K, Katsumata  
26  
27 Y, Fujimori M, Hisanaga A, Takahashi Y. Suicide prevention strategies in Japan: A 15-  
28  
29 year review (1998–2013). *J Public Health Policy* 2015;36:52-66.  
30  
31  
32  
33  
34  
35  
36  
37  
38  
39  
40  
41  
42  
43  
44  
45  
46  
47  
48  
49  
50  
51  
52  
53  
54  
55  
56  
57  
58  
59  
60



1  
2  
3  
4  
5  
6  
7  
8  
9  
10  
11  
12  
13  
14  
15  
16  
17  
18  
19  
20  
21  
22  
23  
24  
25  
26  
27  
28  
29  
30  
31  
32  
33  
34  
35  
36  
37  
38  
39  
40  
41  
42  
43  
44  
45  
46  
47  
48  
49  
50  
51  
52  
53  
54  
55  
56  
57  
58  
59  
60

For peer review only

**Table 1.** Baseline characteristics of suicide by sex and age group

| Characteristics                        | Overall          | Year            |                 |                 |                 | <i>p</i> -value <sup>†</sup> |
|----------------------------------------|------------------|-----------------|-----------------|-----------------|-----------------|------------------------------|
|                                        |                  | 1993-1998       | 1999-2004       | 2005-2010       | 2011-2016       |                              |
| <b>Total number of deaths*</b>         | 6,007,678        | 1,445,819       | 1,467,088       | 1,479,483       | 1,615,288       |                              |
| <b>Number of deaths due to suicide</b> | 249,085 (4.15%)  | 34,064 (2.36%)  | 51,413 (3.50%)  | 78,674 (5.32%)  | 84,934 (5.26%)  |                              |
| <b>Sex</b>                             |                  |                 |                 |                 |                 | <0.01                        |
| Men                                    | 169,963 (68.23%) | 23,733 (69.67%) | 35,619 (69.28%) | 51,525 (65.49%) | 59,086 (69.57%) |                              |
| Women                                  | 79,122 (31.77%)  | 10,331 (30.33%) | 15,794 (30.72%) | 27,149 (34.51%) | 25,848 (30.43%) |                              |
| <b>Age group</b>                       |                  |                 |                 |                 |                 | <0.01                        |
| 0-19 years                             | 7,767 (3.2%)     | 2,362 (6.9%)    | 1,649 (3.2%)    | 1,944 (2.5%)    | 1,812 (2.1%)    |                              |
| 20-29 years                            | 29,988 (12.0%)   | 7,108 (20.9%)   | 6,306 (12.3%)   | 9,097 (11.6%)   | 7,477 (8.8%)    |                              |
| 30-39 years                            | 43,015 (17.3%)   | 7,800 (22.9%)   | 9,654 (18.8%)   | 12,575 (16.0%)  | 12,986 (15.3%)  |                              |
| 40-49 years                            | 47,796 (19.2%)   | 5,815 (17.1%)   | 10,468 (20.4%)  | 14,938 (19.0%)  | 16,575 (19.5%)  |                              |
| 50-59 years                            | 41,960 (16.8%)   | 4,701 (13.8%)   | 7,705 (15.0%)   | 12,593 (16.0%)  | 16,961 (20.0%)  |                              |
| 60-69 years                            | 33,214 (13.3%)   | 3,259 (9.6%)    | 7,441 (14.5%)   | 11,615 (14.8%)  | 10,899 (12.8%)  |                              |
| 70-79 years                            | 29,654 (11.9%)   | 2,142 (6.3%)    | 5,389 (10.5%)   | 10,337 (13.1%)  | 11,786 (13.9%)  |                              |
| ≥80 years                              | 15,661 (6.3%)    | 873 (2.6%)      | 2,800 (5.5%)    | 5,557 (7.1%)    | 6,431 (7.6%)    |                              |

\*Total number of deaths present the overall cause of deaths.

<sup>†</sup>Chi-square test was used to test the differences in the number of deaths by sex and age group  
Data was obtained from Statistics Korea (Available from: <http://kosis.kr/>)

**Table 2.** Joinpoint regression analysis for suicide rate from 1993 to 2016 in Korean men by age group

| Categories      | Suicide rate |        | Trend 1   |                        | Trend 2   |                          | Trend 3   |                          | Trend 4   |                         |
|-----------------|--------------|--------|-----------|------------------------|-----------|--------------------------|-----------|--------------------------|-----------|-------------------------|
|                 | 1993         | 2016   | Years     | APC (95% CI)           | Years     | APC (95% CI)             | Years     | APC (95% CI)             | Years     | APC (95% CI)            |
| <b>Men</b>      |              |        |           |                        |           |                          |           |                          |           |                         |
| 10-19 years old | 5.35         | 5.57   | 1993-1998 | 4.8% (-5.2% to 16.0%)  | 1998-2001 | -14.7% (-48.4% to 40.9%) | 2001-2016 | 2.8% (0.5% to 5.2%)*     |           |                         |
| 20-29 years old | 14.44        | 19.91  | 1993-2006 | 0.5% (-1.6% to 2.7%)   | 2006-2010 | 12.1% (-7.3% to 35.6%)   | 2010-2016 | -5.8% (-11.7% to 0.5%)   |           |                         |
| 30-39 years old | 15.53        | 31.32  | 1993-2016 | 3.0% (2.1% to 4.0%)*   |           |                          |           |                          |           |                         |
| 40-49 years old | 18.39        | 42.34  | 1993-1998 | 15.6% (3.0% to 29.8%)* | 1998-2016 | 1.9% (0.8% to 2.9%)*     |           |                          |           |                         |
| 50-59 years old | 23.92        | 48.32  | 1993-2004 | 8.0% (4.6% to 11.5%)*  | 2004-2016 | -0.2% (-1.9% to 1.6%)    |           |                          |           |                         |
| 60-69 years old | 26.58        | 55.74  | 1993-2005 | 10.7% (7.8% to 13.7%)* | 2005-2016 | -3.6% (-5.5% to -1.7%)*  |           |                          |           |                         |
| 70-79 years old | 34.38        | 90.32  | 1993-2004 | 12.9% (9.9% to 16.0%)* | 2004-2011 | 1.2% (-2.2% to 4.7%)     | 2011-2016 | -7.5% (-11.2% to -3.5%)* |           |                         |
| ≥80 years old   | 41.74        | 150.52 | 1993-2000 | 9.2% (2.3% to 16.7%)*  | 2000-2003 | 29.7% (-3.3% to 74.0%)   | 2003-2010 | 0.9% (-2.4% to 4.3%)     | 2010-2016 | -6.2% (-8.8% to -3.6%)* |

Joinpoint regression model is used to test that age-standardized rates have significantly changed. The trends in suicide mortality rates were summarized as APC (annual percentage change).

Age-standardized rates were expressed per 100,000 men and Korean mid-year population in year 2005 was used for age-standardization.

APC: annual percentage change, CI: confidence interval.

\*p-value <0.05

**Table 3.** Joinpoint regression analysis for suicide rate from 1993 to 2016 in Korean women by age group

| Categories      | Suicide rate |       | Trend 1   |                         | Trend 2   |                          | Trend 3   |                           | Trend 4   |                          |
|-----------------|--------------|-------|-----------|-------------------------|-----------|--------------------------|-----------|---------------------------|-----------|--------------------------|
|                 | 1993         | 2016  | Years     | APC (95% CI)            | Years     | APC (95% CI)             | Years     | APC (95% CI)              | Years     | APC (95% CI)             |
| <b>Women</b>    |              |       |           |                         |           |                          |           |                           |           |                          |
| 10-19 years old | 3.01         | 4.15  | 1993-1998 | 14.4% (5.2% to 24.3%)*  | 1998-2001 | -21.4% (-47.0% to 16.6%) | 2001-2009 | 8.0% (2.3% to 14.0%)*     | 2009-2016 | -5.1% (-10.0% to -0.0%)* |
| 20-29 years old | 6.97         | 12.46 | 1993-1998 | 10.0% (-1.3% to 22.5%)* | 1998-2001 | -14.8% (-47.7% to 38.8%) | 2001-2008 | 19.9% (12.0% to 28.5%)*   | 2008-2016 | -9.5% (-13.3% to -5.6%)* |
| 30-39 years old | 8.07         | 17.65 | 1993-2006 | 5.0% (3.2% to 6.8%)*    | 2006-2009 | 20.8% (-4.4% to 52.5%)   | 2009-2016 | -5.9% (-8.9% to -2.8%)*   |           |                          |
| 40-49 years old | 7.57         | 16.47 | 1993-2010 | 6.5% (5.4% to 7.7%)*    | 2010-2016 | -3.3% (-6.8% to 0.3%)    |           |                           |           |                          |
| 50-59 years old | 5.47         | 16.35 | 1993-2010 | 6.6% (5.0% to 8.2%)*    | 2010-2016 | -5.5% (-8.6% to 0.0%)    |           |                           |           |                          |
| 60-69 years old | 9.10         | 14.65 | 1993-2005 | 9.4% (7.5% to 11.4%)*   | 2005-2010 | 0.7% (-5.4% to 7.3%)     | 2010-2016 | -8.7% (-11.9% to -5.5%)*  |           |                          |
| 70-79 years old | 12.19        | 26.50 | 1993-2004 | 13.5% (11.0% to 16.1%)* | 2004-2011 | -1.5% (-4.6% to 1.7%)    | 2011-2016 | -9.9% (-13.9% to -5.8%)*  |           |                          |
| ≥80 years old   | 17.21        | 45.73 | 1993-2004 | 18.0% (14.3% to 21.8%)* | 2004-2011 | -1.3% (-5.1% to 2.5%)    | 2011-2016 | -11.5% (-15.8% to -6.9%)* |           |                          |

Joinpoint regression model is used to test that age-standardized rates have significantly changed. The trends in suicide mortality rates were summarized as APC (annual percentage change). Age-standardized rates were expressed per 100,000 women and Korean mid-year population in year 2005 was used for age-standardization.

APC: annual percentage change, CI: confidence interval.

\**p*-value <0.05

1  
2  
3  
4  
5 **Figure legends**  
6

7  
8 **Figure 1.** Trends in age-standardized suicide rates in South Korea, 1993-2016  
9

10 Footnotes:

11 APC=Annual percent change

12  
13 The age-standardized suicide rates are presented as suicide death cases per 100,000 people using Korean mid-year population in 2005 as  
14 standard population.  
15

16 Joinpoint regression analysis was used to determine whether there were significant changes in trends in age-standardized suicide rates for the  
17 period between 1993 and 2016.  
18

19 \*p<0.05  
20  
21  
22  
23

24 **Figure 2.** Implementation of National Suicide Prevention Program and Plan  
25

26 Footnotes:

27  
28 The age-standardized suicide rates are presented as connected line from 1993 to 2016.  
29

30 Each number represents the year in which the major events related to national suicide prevention program or plan were occurred.  
31  
32  
33  
34  
35  
36  
37  
38  
39  
40  
41  
42  
43  
44  
45  
46  
47

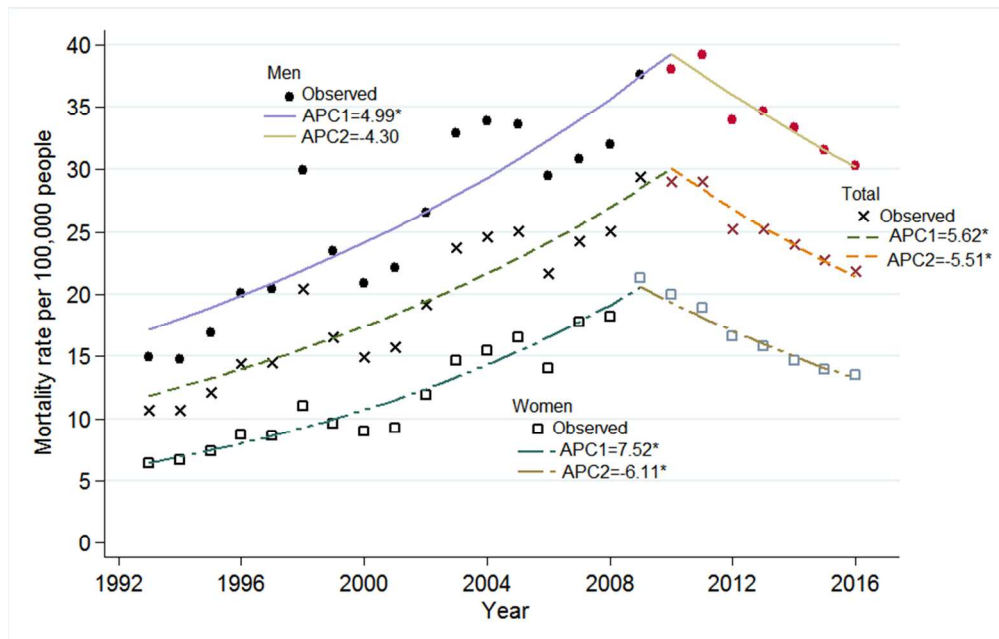

Figure 1. Trends in age-standardized suicide rates in South Korea, 1993-2016

318x202mm (72 x 72 DPI)

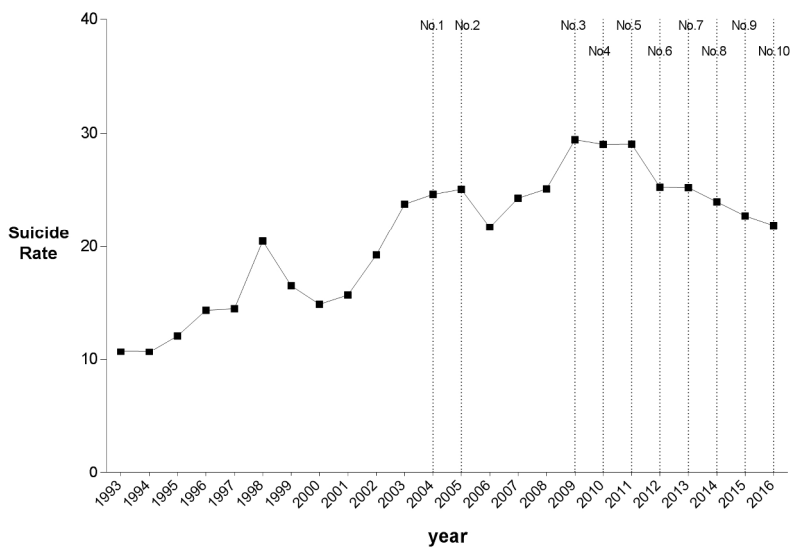

| No. | Year | National suicide prevention program or plan                                                                                                                        |
|-----|------|--------------------------------------------------------------------------------------------------------------------------------------------------------------------|
| 1   | 2004 | The establishment of the first 5-year National Strategy for Suicide Prevention                                                                                     |
| 2   | 2005 | Suicide prevention program was introduced into regional mental welfare centers                                                                                     |
| 3   | 2009 | The establishment of the second 5-year National Strategy for Suicide Prevention                                                                                    |
| 4   | 2010 | The establishment of integrated welfare system<br>The expansion of the basic living subsidies<br>The increase in the number of welfare officers                    |
| 5   | 2011 | The enactment of the Act on Preventing Suicide<br>The inhibition of sales of paraquat pesticides                                                                   |
| 6   | 2012 | The enforcement of the Act on Preventing Suicide<br>The introduction of the Korean gatekeeper program for suicide prevention entitled "Look and Listening and Say" |
| 7   | 2013 | The introduction of management of emergency department based suicide attempts<br>The certification of private suicide prevention                                   |
| 8   | 2014 | The collaboration the government with religious organizations<br>The establishment of the Korea Psychological Autopsy Center                                       |
| 9   | 2015 | The expansion of screen door on the subway<br>"Are you okay" campaign                                                                                              |
| 10  | 2016 | The establishment of the comprehensive national mental health care strategy<br>"Air kiss" campaign                                                                 |

Figure 2. Implementation of National Suicide Prevention Program and Plan

275x400mm (195 x 195 DPI)

**Supplementary table 1.** The number of death from suicide, suicide mortality rates from 1993 to 2016 in South Korea

| Year | Population | Number of suicide death | Age-standardized suicide mortality rate |
|------|------------|-------------------------|-----------------------------------------|
| 1993 | 44,752,157 | 4,208                   | 10.7                                    |
| 1994 | 45,208,726 | 4,277                   | 10.7                                    |
| 1995 | 45,637,184 | 4,930                   | 12.1                                    |
| 1996 | 46,062,143 | 5,959                   | 14.4                                    |
| 1997 | 46,475,163 | 6,068                   | 14.5                                    |
| 1998 | 46,837,620 | 8,622                   | 20.4                                    |
| 1999 | 47,163,425 | 7,056                   | 16.5                                    |
| 2000 | 47,534,117 | 6,444                   | 14.9                                    |
| 2001 | 47,877,049 | 6,911                   | 15.7                                    |
| 2002 | 48,125,745 | 8,612                   | 19.2                                    |
| 2003 | 48,308,386 | 10,898                  | 23.7                                    |
| 2004 | 48,485,314 | 11,492                  | 24.6                                    |
| 2005 | 48,683,040 | 12,011                  | 25.1                                    |
| 2006 | 48,887,027 | 10,653                  | 21.7                                    |
| 2007 | 49,130,354 | 12,174                  | 24.3                                    |
| 2008 | 49,404,648 | 12,858                  | 25.1                                    |
| 2009 | 49,656,756 | 15,412                  | 29.5                                    |
| 2010 | 49,879,812 | 15,566                  | 29.1                                    |
| 2011 | 50,111,476 | 15,906                  | 29.1                                    |
| 2012 | 50,345,325 | 14,160                  | 25.3                                    |
| 2013 | 50,558,952 | 14,427                  | 25.3                                    |
| 2014 | 50,763,158 | 13,836                  | 24.0                                    |
| 2015 | 50,951,719 | 13,513                  | 22.8                                    |
| 2016 | 51,112,972 | 13,092                  | 21.9                                    |

Data was obtained from Statistics Korea (Available from: <http://kosis.kr/>)

Age-standardized rates were expressed per 100,000 people and Korean mid-year population in year 2005 was used for age-standardization.



STROBE Statement—Checklist of items that should be included in reports of *cohort studies*

|                           | Item No | Recommendation                                                                                                                                                                                                                                                                                                         | Page No                                            |
|---------------------------|---------|------------------------------------------------------------------------------------------------------------------------------------------------------------------------------------------------------------------------------------------------------------------------------------------------------------------------|----------------------------------------------------|
| <b>Title and abstract</b> | 1       | (a) Indicate the study's design with a commonly used term in the title or the abstract<br>(b) Provide in the abstract an informative and balanced summary of what was done and what was found                                                                                                                          | p.2<br>p.2                                         |
| <b>Introduction</b>       |         |                                                                                                                                                                                                                                                                                                                        |                                                    |
| Background/rationale      | 2       | Explain the scientific background and rationale for the investigation being reported                                                                                                                                                                                                                                   | p.5                                                |
| Objectives                | 3       | State specific objectives, including any prespecified hypotheses                                                                                                                                                                                                                                                       | p.5<br>line 15-22                                  |
| <b>Methods</b>            |         |                                                                                                                                                                                                                                                                                                                        |                                                    |
| Study design              | 4       | Present key elements of study design early in the paper                                                                                                                                                                                                                                                                | p.1,7                                              |
| Setting                   | 5       | Describe the setting, locations, and relevant dates, including periods of recruitment, exposure, follow-up, and data collection                                                                                                                                                                                        | p.6<br>Line 1-11                                   |
| Participants              | 6       | (a) Give the eligibility criteria, and the sources and methods of selection of participants. Describe methods of follow-up<br>(b) For matched studies, give matching criteria and number of exposed and unexposed                                                                                                      | p.6<br>Line 1-11<br>-                              |
| Variables                 | 7       | Clearly define all outcomes, exposures, predictors, potential confounders, and effect modifiers. Give diagnostic criteria, if applicable                                                                                                                                                                               | p.6<br>Line 10-11, 13-20                           |
| Data sources/measurement  | 8*      | For each variable of interest, give sources of data and details of methods of assessment (measurement). Describe comparability of assessment methods if there is more than one group                                                                                                                                   | p.6<br>Line 10-11                                  |
| Bias                      | 9       | Describe any efforts to address potential sources of bias                                                                                                                                                                                                                                                              | p.16<br>Line 10-21                                 |
| Study size                | 10      | Explain how the study size was arrived at                                                                                                                                                                                                                                                                              | p.8<br>Line 3-8                                    |
| Quantitative variables    | 11      | Explain how quantitative variables were handled in the analyses. If applicable, describe which groupings were chosen and why                                                                                                                                                                                           | p.7<br>Line 5-7                                    |
| Statistical methods       | 12      | (a) Describe all statistical methods, including those used to control for confounding<br>(b) Describe any methods used to examine subgroups and interactions<br>(c) Explain how missing data were addressed<br>(d) If applicable, explain how loss to follow-up was addressed<br>(e) Describe any sensitivity analyses | p.7<br>Line 7-21<br>p.7<br>Line 5-7<br>-<br>-<br>- |
| <b>Results</b>            |         |                                                                                                                                                                                                                                                                                                                        |                                                    |
| Participants              | 13*     | (a) Report numbers of individuals at each stage of study—eg numbers potentially eligible, examined for eligibility, confirmed eligible, included in the study, completing follow-up, and analysed<br>(b) Give reasons for non-participation at each stage<br>(c) Consider use of a flow diagram                        | p.8<br>Line 3-8<br>-<br>-                          |
| Descriptive data          | 14*     | (a) Give characteristics of study participants (eg demographic, clinical, social) and information on exposures and potential confounders                                                                                                                                                                               | p.8<br>Line 2-                                     |

|                          |     |                                                                                                                                                                                                                                                                                                                                                                                                               |                                                                   |
|--------------------------|-----|---------------------------------------------------------------------------------------------------------------------------------------------------------------------------------------------------------------------------------------------------------------------------------------------------------------------------------------------------------------------------------------------------------------|-------------------------------------------------------------------|
|                          |     | (b) Indicate number of participants with missing data for each variable of interest                                                                                                                                                                                                                                                                                                                           | 13<br>-                                                           |
|                          |     | (c) Summarise follow-up time (eg, average and total amount)                                                                                                                                                                                                                                                                                                                                                   | p.8<br>Line 3                                                     |
| Outcome data             | 15* | Report numbers of outcome events or summary measures over time                                                                                                                                                                                                                                                                                                                                                | p.8<br>Line 3-8                                                   |
| Main results             | 16  | (a) Give unadjusted estimates and, if applicable, confounder-adjusted estimates and their precision (eg, 95% confidence interval). Make clear which confounders were adjusted for and why they were included<br>(b) Report category boundaries when continuous variables were categorized<br>(c) If relevant, consider translating estimates of relative risk into absolute risk for a meaningful time period | p.8<br>Line 15-24<br><br>p.7<br>Line 5-7<br>Supplementary table 1 |
| Other analyses           | 17  | Report other analyses done—eg analyses of subgroups and interactions, and sensitivity analyses                                                                                                                                                                                                                                                                                                                | -                                                                 |
| <b>Discussion</b>        |     |                                                                                                                                                                                                                                                                                                                                                                                                               |                                                                   |
| Key results              | 18  | Summarise key results with reference to study objectives                                                                                                                                                                                                                                                                                                                                                      | p.11 Line 23-<br>p.12 Line 5                                      |
| Limitations              | 19  | Discuss limitations of the study, taking into account sources of potential bias or imprecision. Discuss both direction and magnitude of any potential bias                                                                                                                                                                                                                                                    | p.16<br>Line 10-21                                                |
| Interpretation           | 20  | Give a cautious overall interpretation of results considering objectives, limitations, multiplicity of analyses, results from similar studies, and other relevant evidence                                                                                                                                                                                                                                    | p.12 Line 9-<br>p.16 Line 7                                       |
| Generalisability         | 21  | Discuss the generalisability (external validity) of the study results                                                                                                                                                                                                                                                                                                                                         | p.12 Line 5-7<br>p.16 Line 22-<br>p.17 Line 2                     |
| <b>Other information</b> |     |                                                                                                                                                                                                                                                                                                                                                                                                               |                                                                   |
| Funding                  | 22  | Give the source of funding and the role of the funders for the present study and, if applicable, for the original study on which the present article is based                                                                                                                                                                                                                                                 | p.17<br>Line 20-22                                                |

\*Give information separately for exposed and unexposed groups.

**Note:** An Explanation and Elaboration article discusses each checklist item and gives methodological background and published examples of transparent reporting. The STROBE checklist is best used in conjunction with this article (freely available on the Web sites of PLoS Medicine at <http://www.plosmedicine.org/>, Annals of Internal Medicine at <http://www.annals.org/>, and Epidemiology at <http://www.epidem.com/>). Information on the STROBE Initiative is available at <http://www.strobe-statement.org>.

# BMJ Open

## Changing trends in suicide rates in South Korea from 1993 to 2016: A descriptive study

|                                 |                                                                                                                                                                                                                                                                                                                                                                                                                                                             |
|---------------------------------|-------------------------------------------------------------------------------------------------------------------------------------------------------------------------------------------------------------------------------------------------------------------------------------------------------------------------------------------------------------------------------------------------------------------------------------------------------------|
| Journal:                        | <i>BMJ Open</i>                                                                                                                                                                                                                                                                                                                                                                                                                                             |
| Manuscript ID                   | bmjopen-2018-023144.R1                                                                                                                                                                                                                                                                                                                                                                                                                                      |
| Article Type:                   | Research                                                                                                                                                                                                                                                                                                                                                                                                                                                    |
| Date Submitted by the Author:   | 01-May-2018                                                                                                                                                                                                                                                                                                                                                                                                                                                 |
| Complete List of Authors:       | Lee, Sang Uk; National Center for Mental Health, Mental Health Research Park, Jong-Ik; Kangwon National University School of Medicine, Department of Psychiatry<br>Lee, Soojung; Kyungnam University, Department of Nursing<br>Oh, In-Hwan; Kyung Hee University, Department of Preventive Medicine<br>Choi, Joong-Myung ; Kyung Hee University, Department of Preventive Medicine<br>Oh, Chang-Mo; Kyung Hee University, Department of Preventive Medicine |
| <b>Primary Subject Heading</b>: | Mental health                                                                                                                                                                                                                                                                                                                                                                                                                                               |
| Secondary Subject Heading:      | Epidemiology, Health policy, Public health                                                                                                                                                                                                                                                                                                                                                                                                                  |
| Keywords:                       | Suicide & self-harm < PSYCHIATRY, Mortality, Social and political issues, Prevention, Republic of Korea                                                                                                                                                                                                                                                                                                                                                     |
|                                 |                                                                                                                                                                                                                                                                                                                                                                                                                                                             |

SCHOLARONE™  
Manuscripts

Only

1  
2  
3  
4 **Changing trends in suicide rates in South Korea from 1993 to**  
5  
6  
7 **2016: A descriptive study**  
8  
9  
10

11 Running title: Trends in suicide in South Korea  
12  
13

14  
15  
16 Sang-Uk Lee<sup>1,2</sup>, Jong-Ik Park<sup>3</sup>, Soojung Lee<sup>4</sup>, In-Hwan Oh<sup>2</sup>, Joong-Myung Choi<sup>2</sup>, Chang-Mo  
17  
18 Oh<sup>2\*</sup>  
19  
20

21  
22  
23 <sup>1</sup>Department of Mental Health Research, National Center for Mental Health, Seoul, Republic  
24  
25 of Korea

26  
27 <sup>2</sup>Department of Preventive Medicine, School of Medicine, Kyung Hee University, Seoul,  
28  
29 Republic of Korea

30  
31 <sup>3</sup>Department of Psychiatry, Kangwon National University School of Medicine, Chunchon,  
32  
33 Republic of Korea

34  
35 <sup>4</sup> Department of Nursing, Kyungnam University, Changwon, Republic of Korea  
36  
37

38  
39  
40 **Corresponding author:** Chang-Mo Oh, MD, PhD

41  
42 Department of Preventive Medicine, School of Medicine, Kyung Hee University,  
43  
44 Kyungheedaero, Dongdaemun-gu, Seoul, 02447, Republic of Korea

45  
46 Tel: +82-2-961-2265 Fax: +82-969-0792

47  
48 E-mail: kachas@naver.com  
49  
50

51  
52  
53 **Word count:** 3,518  
54

## Abstract

**Objectives:** South Korean government has recently implemented policies to prevent suicide. However, there were few studies examining the recent changing trend in suicide rates. This study aims to examine the changing trend in suicide rates by time and age group.

**Design:** A descriptive study using nationwide mortality rates

**Setting:** Data on the nationwide cause of death from 1993 to 2016 were obtained from the Statistics Korea.

**Participants:** People living in the South Korea

**Interventions:** Implementation of national suicide prevention policies (1<sup>st</sup>: 2004 year, 2<sup>nd</sup>: 2009 year)

**Primary outcome measures:** Suicide was defined as “X60-X84” code according to the ICD-10 code. Age-standardized suicide rates were estimated, and a Joinpoint regression model was applied to describe the trends in suicide rate.

**Results:** From 2010 to 2016, the suicide rates in South Korea have been decreasing by 5.5% (95% CI: -10.3% to -0.5%) annually. In terms of sex, the suicide rate for men had increased by 5.0% (95% CI: 3.6% to 6.4%) annually from 1993 to 2010. However, there has been no statistically significant change from 2010 to 2016. For women, the suicide rate had increased by 7.5% (95% CI: 6.3% to 8.7%) annually from 1993 to 2009, but since 2009, the suicide rate has been significantly decreasing by 6.1% (95% CI: -9.1% to -3.0%) annually until 2016. In terms of the age group, the suicide rates among women of almost all age groups have been decreasing since 2010; however, the suicide rates of men aged between 30 and 49 years showed continuously increasing trends.

**Conclusion:** Our results showed that there were differences in the changing trends in suicide rate by sex and age groups. Our finding suggests that there was a possible relationship

1  
2  
3  
4  
5  
6  
7  
8  
9  
10  
11  
12  
13  
14  
15  
16  
17  
18  
19  
20  
21  
22  
23  
24  
25  
26  
27  
28  
29  
30  
31  
32  
33  
34  
35  
36  
37  
38  
39  
40  
41  
42  
43  
44  
45  
46  
47  
48  
49  
50  
51  
52  
53  
54  
55  
56  
57  
58  
59  
60

between implementation of second national suicide prevention policies and a decline in suicide rate.

**Keywords:** Suicide; Mortality; Social and political issues; Prevention; Republic of Korea

For peer review only

## Article Summary

### Strengths and limitations of this study

- Our findings show that efforts to reduce suicide at the national level may lead to a decline in suicide rates through natural experiment.
- Another finding of our study is that suicide rates in men in their 30s and 40s are continuing to increase, suggesting that a different suicide prevention strategy may be necessary in South Korea.
- Because this study is a descriptive epidemiologic study, it is difficult to know exactly which policies have reduced suicide rates in which age group.
- Improved accuracy of statistics on the causes of death may affect to changes in suicide rates.

## Introduction

Suicide is a major public health issue, with an estimated 788,000 deaths every year according to the World Health Organization (WHO) statistics.<sup>1</sup> The WHO established the Mental Health Action 2013-2020 plan to implement a national, multi-sectorial promotion and prevention program for promoting mental health and reducing suicide rates of each country by 10% until 2020.<sup>2</sup> Especially, the developed countries in East Asia have relatively high mortality rates due to suicide.<sup>3</sup> Among these countries, suicide in South Korea is a serious health problem because the suicide rate in South Korea in 2013 (28.5 per 100,000 person-years) was 2.4 times higher than the average suicide rates of other Organization for Economic Co-operation and Development (OECD) countries and South Korea has been ranked top among the OECD countries in terms of suicide rates in the last 10 years.<sup>4</sup> In addition, suicide was the most common cause of death in young people aged between 10 and 39 years, and it was the second-most common cause of death among adults aged 40-59 years in 2016 in South Korea.<sup>5</sup>

South Korea implemented the national suicide prevention program in the early 2000s.<sup>6</sup> This national suicide prevention program includes both high-risk group-oriented monitoring and prevention of suicide and suicide prevention program for general population such as media campaign.<sup>7</sup> However, there was a few studies to examine the trends in suicide rates by sex and age group with regard to the national suicide prevention policies in South Korea. Therefore, this study aimed to describe the changing trends in suicide rate by sex and age group in South Korea and exploring the potential effects of implementation of the national suicide prevention policies.



## Method

### *Study participants*

The cause of death statistics is a reliable source of data on how the causes of death have changed because of socioeconomic changes and public health developments; it also provides comprehensive information to plan and prioritize health care policies. The number of deaths due to suicide and the corresponding mid-year population counts from 1993 to 2016 were obtained from Statistic Korea (Available from <http://kosis.kr/>). The Statistic Korea used the estimated population as the denominator for mortality rates before year 1993. After 1993, Statistic Korea used the mid-year population based on resident registration number as the denominator for mortality rates. In addition, the cause of death data before 1993 is less accurate, therefore, we selected the suicide rates from 1993 to 2016. The code assigned to the cause of death due to suicide was “X60-X84” according to the ICD-10 code.

### *Patient and Public Involvement*

We did not contact with patients and our study was not directly associated with patients, because we used the administrative secondary data – the cause of death data from Statistic Korea. There was no role or participation of patients in our study.

### *National suicide prevention program*

Information regarding the timing and implementation of the national suicide prevention policy in South Korea were obtained from relevant government data and expert consultants. Initially, the timing and details of the national suicide prevention policy were obtained from the national knowledge information system (<https://nkis.re.kr:4445/main.do>) and publications from Korea Suicide Prevention Center.<sup>7-10</sup> The contents and details obtained from these

1  
2  
3  
4 websites were confirmed after review by the experts and staffs of Korea Suicide Prevention  
5 Center.<sup>6-12</sup>  
6  
7  
8  
9

### 10 ***Ethics statement***

11  
12 The study protocol was reviewed by the Institutional Review Board of Kyung Hee  
13 University (IRB No.KHSIRB-17-086). Our study was exempted from review because it was  
14 not an experimental trial, which required contacting the patients, and our study did not  
15 include personal identifiable information.  
16  
17  
18  
19  
20  
21  
22

### 23 ***Statistical analysis***

24  
25 To describe the baseline characteristics of people who die due to suicide, the number of  
26 deaths was presented for each 6-year period (1993-1998/1999-2004/2005-2010/2011-2016)  
27 from 1993 to 2016. Chi-square test was used to test the differences in the distribution of death  
28 due to suicide by sex and age groups. To describe the changes in suicide rates by time period,  
29 the age-standardized suicide rates of suicide were calculated. The mid-year Korean  
30 population in 2005 was used as the standard population for age-standardized suicide rates.  
31 Age-specific suicide rates were applied to the corresponding 5-year age group of the standard  
32 population. The sum of expected deaths for each 5-year age group was calculated, and the  
33 age-standardized suicide rates were calculated by dividing the sum of expected deaths by the  
34 total number of standard population. We used Joinpoint regression program to know whether  
35 there were changes in trends in mortality rates. Joinpoint statistical software was developed  
36 by the National Cancer Institute in the United States. Joinpoint regression modelling was  
37 used to test the trends in age-standardized suicide rates for suicide and detect significant  
38 changes over time to fit a better multi-segmented model compared to a simple linear model  
39  
40  
41  
42  
43  
44  
45  
46  
47  
48  
49  
50  
51  
52  
53  
54

1  
2  
3  
4 using a Monte Carlo permutation method.<sup>13</sup> Further, it could detect point where significant  
5  
6 change in rates over time. The trends in rates were summarized as annual percentage changes  
7  
8 (APCs) and their 95% confidence intervals (CIs).  
9

10 *P* values <0.05 were considered statistically significant. We used SPSS (version 23.0,  
11 Armonk, NY: IBM Corp., USA) and R software (version 3.1.1, Vienna, Austria) and  
12  
13 Joinpoint Regression Program software (Version 4.1.1, Statistical Methodology and  
14  
15 Applications Branch, Surveillance Research Program, National Cancer Institute, Bethesda,  
16  
17 MD, USA).  
18  
19  
20  
21  
22  
23  
24  
25

## 26 **Results**

### 27 *Baseline characteristics*

28  
29  
30 The total number of deaths in South Korea from 1993 to 2016 was 6,007,678 (Table 1). Of  
31  
32 these, the total number of deaths due to suicide was 249,085 (4.1%). Of the deaths due to  
33  
34 suicide, 169,963 (68.2%) were men, and 79,122 (31.8%) were women. In terms of the time  
35  
36 period, South Korea had the highest number of deaths from suicide (n=15,906) and the  
37  
38 highest age-standardized suicide rate from suicide (29.1 per 100,000 person-year) in 2011  
39  
40 (Table 2). After 2011, the number of deaths and age-standardized suicide rates due to suicide  
41  
42 decreased until 2016. The number of deaths due to suicide in 2011-2016 was 2.5 times higher  
43  
44 than that in 1993-1998. According to the age groups, the proportion of deaths due to suicide  
45  
46 in children and adolescents aged between 10 and 19 years had decreased from 1993-1998 to  
47  
48 2011-2016, whereas the proportion of elderly aged more than 70 years had increased during  
49  
50 the same time period (p<0.0001).  
51  
52  
53  
54

### ***Trends in suicide rates***

According to the joinpoint regression model, the mortality rate from suicide had increased by 5.6% (95% CI: 4.4% to 6.9%) annually from 1993 to 2010 (Figure 1). After 2010, the suicide rate had declined by 5.5% (95% CI: -10.3% to -0.5%) annually until 2016. In terms of sex, suicide rate for men had increased by 5.0% (95% CI: 3.6% to 6.4%) annually from 1993 to 2010. After 2010, suicide rate for men shown decreasing trends (APC=-4.3%, 95% CI: -9.8% to 1.6%), although it was not statistically significant ( $p=0.14$ ). Similarly, the suicide rates for women had increased by 7.5% (95% CI: 6.3% to 8.7%) annually from 1993 to 2009. Following that, suicide rates for women showed a significant decreasing trend (APC=-6.1%, (95% CI: -9.1% to -3.0%)).

### ***Trends in suicide rates for men by age group***

Joinpoint regression analysis was performed by sex and age group. Suicide rates for men increased with age (Table 3). The suicide rate of adolescents aged 10-19 years is relatively low, ranging from 3 to 7 people per 100,000 persons. The suicide rate of adolescents aged 10-19 years has been increasing annually by 2.8% since 2001. Although there was no statistically significant change in suicide rate of young adults aged 20-29 years, the rates showed increasing trends from 2006 to 2010, and it has tended to decrease since 2010. The suicide rate of men aged 30-39 years showed a significant annual increase of 3.1% from 1993 to 2016. For men aged 40-49 years, the suicide rate dramatically increased by 15.6% annually from 1993 to 1998. Since 1998, the increasing trend in the suicide rate has attenuated among men aged 40-49 years (APC=1.9% (95% CI: 0.9% to 2.9%)). The suicide rate for men aged 50-59 years has increased by 8.0% from 1993 to 2004. However, there has been no

1  
2  
3  
4 significant increase since 2004. For men aged 60-69 years, there was a statistically significant  
5 increase in suicide rate by 10.7% increase each year between 1993 and 2005; however, there  
6 has been a decreasing trend since 2005. The suicide rate for men aged 70-79 years had  
7 increased by 12.9% annually from 1993 to 2004 but has been decreasing by 7.5% annually  
8 since 2011. For men aged 80 years and above, the suicide rate had increased by 9.2%  
9 annually between 1993 and 2000. There was no significant change in the suicide rate for men  
10 from 2000 to 2010. Since 2010, the suicide rate has been decreasing by 6.2% annually.  
11  
12  
13  
14  
15  
16  
17  
18  
19  
20

### 21 ***Trends in suicide rates for women by age group***

22  
23 Table 3 shows the suicide rate for women by age group. The suicide rate of adolescents  
24 aged 10-19 years is relatively low, and the trends of suicide rates are similar to that in the  
25 twenties. Suicide rates in women aged 20-29 years had increased by 20.0% annually from  
26 2001 to 2008. Since 2008, suicide rate for women aged 20-29 years has decreased by 9.5%  
27 annually. The suicide rate of women aged 30-39 years showed a significant annual increase of  
28 5.0% from 1993 to 2006, whereas the suicide rates tended to decrease by 5.9% annually from  
29 2009 to 2016. For women aged 40-49 years, the suicide rate had increased by 6.5% annually  
30 from 1993 to 2010. Since 2010, there was no significant change in the suicide rate. The  
31 suicide rate for women aged 50-59 years had increased by 6.6% from 1993 to 2010. After  
32 2010, the suicide rates for women aged 50-59 years showed a decreasing trend (APC=-5.5%  
33 (95% CI: -8.6% to 0.0%)). For women aged 60-69 years, there was a statistically significant  
34 increase in the suicide rate with 9.4% increase each year from 1993 to 2005; however, there  
35 has been a significant decreasing trend since 2010 (APC=-8.7% (95% CI: -11.9% to -5.5%)).  
36  
37 The suicide rate for women aged 70-79 years increased by 13.5% annually from 1993 to 2004  
38 but has decreased significantly by 9.9% annually since 2011. For women aged 80 years and  
39  
40  
41  
42  
43  
44  
45  
46  
47  
48  
49  
50  
51  
52  
53  
54

1  
2  
3  
4 above, the suicide rates had dramatically increased by 18.0% annually from 1993 to 2004.  
5  
6 There was no significant change from 2004 to 2011. Since 2011, suicide rate has decreased  
7  
8 by 11.5% annually.  
9

### 12 ***The implementation of the National Suicide Prevention Program in South Korea***

14 The first step of the national suicide prevention program was the establishment of the first  
15 5-year National Strategy for Suicide Prevention in 2004 (Figure 2). Based on this, a suicide  
16 prevention program was introduced in 2005 at regional mental health centres which were  
17 public community infrastructures for mental health. Following this, the second 5-year  
18 National Strategy for Suicide Prevention was implemented in 2009. Based on this program, a  
19 separate budget was newly proposed and executed. In 2010, a screen door was expanded to  
20 prevent suicide on the subway. In 2011, the Act for the Prevention of Suicide was passed, the  
21 Korea Suicide Prevention Center was established, and the sales of paraquat pesticides were  
22 prohibited. The Act for the Prevention of Suicide was enforced in 2012, and the Korean  
23 gatekeeper training program for suicide prevention entitled '*Look and Listening and Say*' was  
24 introduced to the general population in South Korea. In 2013, an emergency department-  
25 based suicide attempt survivor management program was implemented, and the Korea  
26 Suicide Prevention Center along with Journalists Association of Korea announced the  
27 recommendation for media reporting of suicide. In addition, the government authenticated the  
28 private suicide prevention program to disseminate the evidence-based suicide prevention  
29 program. In 2014, the government collaborated with religious organizations to increase the  
30 participation rates of general population in the national suicide program. The Korea  
31 Psychological Autopsy Center was established to understand the causes of suicide deaths  
32 better.  
33  
34  
35  
36  
37  
38  
39  
40  
41  
42  
43  
44  
45  
46  
47  
48  
49  
50  
51  
52  
53  
54

## Discussion

This study aimed to examine the trends of suicide rate in South Korea by sex and age group and explore these suicide rate changes according to the timing of suicide prevention policies implemented by the Korean government. This study found that the overall suicide rate in South Korea had tended to decline since 2010. However, when analysed by sex and age, the suicide rate trends showed differences according to the sex and age groups. While women's suicide rate has decreased in all age groups since 2010, the suicide rate of men aged between 30 and 49 years is still on the rise. Our findings were consistent with the study findings of Matsubayashi et al.<sup>14</sup> They showed that a national level of suicide prevention intervention was effective way to reduce suicide rate except for working-age adults in 21 OECD countries.<sup>14</sup>

### *Trend in suicide rate after 2004/2005*

From 1993 to 2016, the suicide rates tended to change at two points in time. First, this study found that the suicide rate changed before and after 2004 and 2005. It was revealed that after 2004, an increase in the suicide rate of men and women aged 60 years or older had changed. After 2005, the suicide rate of men in their 60s decreased by 3.6% each year and that of women in their 60s, which had risen sharply up until 2005, no longer showed a statistically significant increase from 2005 to 2010.

During this period, Korea's 1<sup>st</sup> national suicide prevention initiative was implemented in 2004, which included various programs such as mental health improvement and suicide prevention, suicide prevention counseling calls, the development of a culture that respects life,

1  
2  
3  
4 treatment and post-suicide attempt management for those who attempt suicide, and suicide  
5 prevention research.<sup>12</sup> In addition, the Mental Health Welfare Center, a national mental health  
6 system, also implemented a regional suicide prevention program in 2005, and the Seoul  
7 Suicide Prevention Center was first established.<sup>15</sup> Although the 1<sup>st</sup> suicide prevention  
8 initiative was implemented in 2004, the government did not earmark funding for the 1<sup>st</sup>  
9 suicide prevention initiative.<sup>16</sup> For this reason, it is difficult to find the data that can precisely  
10 identify the programs that were actually implemented among various other programs.  
11 Nonetheless, a suicide prevention program implemented by the Mental Health Welfare  
12 Center mainly focused on management via phone calls, and it has been applied since 2005  
13 without additional funding. Previous studies reported that interventions and management  
14 based on phone calls were effective for the suicide prevention of the elderly,<sup>17,18</sup> and in this  
15 regard, changes in the suicide rate mostly found among those aged 60 years or older can be  
16 attributed to the effect of phone-based interventions.<sup>19</sup> These changes in the suicide rate,  
17 however, were found to be not a statistically significant decline in the suicide rate overall but  
18 a change in the increasing trend of the suicide rate.

### ***Trend in suicide rate after 2008/2009***

19  
20  
21  
22  
23  
24  
25  
26  
27  
28  
29  
30  
31  
32  
33  
34  
35  
36  
37  
38  
39  
40  
41  
42  
43  
44  
45  
46  
47  
48  
49  
50  
51  
52  
53  
54  
55  
56  
57  
58  
59  
60  
Second, the suicide rate began to decline from 2008 to 2011. As of 2008 and 2009, the  
suicide rate for females aged 10 to 39 years, which had increased before, began to decrease.  
As of 2010 and 2011, the suicide rate of women aged 40 years or older also began to decline.  
Furthermore, the suicide rates of men in their 20s and those aged 70 years or older tended to  
decline since 2010 and 2011, respectively. In contrast, the suicide rate of men aged 30-49  
years had not decreased significantly from 1993 to 2016; instead, it continued to rise during  
this period.



1  
2  
3  
4 To begin with, the 2<sup>nd</sup> national suicide prevention initiative was enacted in 2009, which  
5  
6 consisted of the research and development of suicide prevention policy, development of a  
7  
8 culture that respects life, suicide prevention training and nurturing of specialists, online  
9  
10 counselling and harmful suicide information monitoring, and public-private partnerships for  
11  
12 suicide prevention.<sup>12</sup> The importance of the 2<sup>nd</sup> suicide prevention initiative is that the  
13  
14 national budget was allocated for suicide prevention unlike the 1<sup>st</sup> suicide prevention  
15  
16 initiative. While this initiative could be effective in reducing the suicide rate of young  
17  
18 females in their 10s to 30s, it would be more reasonable to consider that a series of specific  
19  
20 events contributed to a surge in the suicide rate of young women in 2008 and 2009. The  
21  
22 effect of a celebrity's suicide on the suicide rate is well-known,<sup>20, 21</sup> and there were incidents  
23  
24 of suicides among very high-profile celebrities in 2008 and 2009 in South Korea, which were  
25  
26 reported across the country.<sup>7</sup> Furthermore, it was reported that the effect of a celebrity's  
27  
28 suicide in Korea was five times higher among young women.<sup>22</sup> Considering these results, it is  
29  
30 a reasonable interpretation to view a reduction in the suicide rate of young women after 2009  
31  
32 as a decline in the suicide rate surged previously due to the effect of a series of specific  
33  
34 events—celebrity suicides.  
35  
36

37  
38 Some important national suicide prevention activities were carried out during the 2<sup>nd</sup>  
39  
40 suicide prevention initiative, such as the installation of more screen doors to prevent people  
41  
42 from throwing themselves into the subway train<sup>23</sup> and a ban on the sale of paraquat  
43  
44 pesticides.<sup>24</sup> The one of the most effective suicide prevention intervention is to restrict of  
45  
46 assessment to lethal methods.<sup>25</sup> Such government-led suicide prevention interventions may  
47  
48 have contributed to the changes in the suicide rate of men in their 20s, men aged 70 years or  
49  
50 older, and women aged 40 years or older in 2010 and 2011. Moreover, a continuous decrease  
51  
52 in the suicide rate since 2011 indicates that the reduction of suicide rates was attributable to  
53  
54

1  
2  
3  
4 the government intervention efforts. After the introduction of the national suicide prevention  
5  
6 initiative in 2009, the community mental health center has endeavoured to register and  
7  
8 manage more people with severe mental disorder and people with alcoholism. Indeed, the  
9  
10 mental health service utilization rates among people with alcoholism has increased from 8.1%  
11  
12 in 2008 to 12.1% in 2015.<sup>26</sup> The registration and management rate for patients with severe  
13  
14 mental disorder in the community mental health center has also increased from 19.2% in  
15  
16 2008 to 26.4% in 2016. In addition, the government implemented an emergency department-  
17  
18 based suicide attempt survivor management program, announced the recommendation for  
19  
20 media reporting of suicide in 2013.<sup>7</sup>  
21  
22  
23  
24

### 25 ***Increase in suicide rate of men in their 30s and 40s***

26  
27 Nevertheless, it was found that the suicide rate of men in their 30s and 40s had continued  
28  
29 to increase significantly from 1993 to 2016. While there was a slight slowdown in the  
30  
31 increase of their suicide rate due to suicide prevention programs implemented by the  
32  
33 government, it did not result in a decrease in the suicide rate. This might suggest that the  
34  
35 currently implemented suicide prevention programs are not effective for men in their 30s and  
36  
37 40s. However, in Korea, suicide prevention policies focused on men in their 30s and 40s have  
38  
39 not been implemented until now. In previous studies, men were reported to have a higher risk  
40  
41 of suicide due to financial reasons than women do,<sup>27</sup> and the risk of suicide among men  
42  
43 arising due to the unemployment rate and economic crisis was also shown to be higher.<sup>28,29</sup>  
44  
45 However, the current suicide prevention policies only included the development of an office  
46  
47 worker gatekeeper program for men in their 30s and 40s.  
48  
49  
50  
51  
52

### 53 ***Strengths and Limitations of this study***

1  
2  
3  
4 When interpreting the findings of this study, the following limitations need to be  
5 considered. This study did not take account of the individual effect of a suicide prevention  
6 program; it instead interpreted the changes in suicide rates at each point in time when such  
7 programs were implemented. However, we cannot confirm when exactly the effect of policy  
8 was seen. This was because the data on the outcome of each individual suicide prevention  
9 program were not available as Korea did not have a monitoring system for each individual  
10 program, even though it implemented suicide prevention programs quite extensively. In this  
11 regard, a monitoring system needs to be established in order to identify the policy effect on  
12 the changes in the suicide rate in Korea more accurately, and a follow-up study needs to be  
13 conducted using this system. Furthermore, the accuracy of the cause of death statistics had  
14 continued to improve, so there is a chance that an increase in the number of deaths due to  
15 suicide would have been affected by the improved accuracy of statistics on the causes of  
16 death. Despite these limitations, this study has the following strengths. This study presented  
17 the trends in the suicide rates in Korea based on statistical analysis of a 24-year period. In  
18 addition, it showed that the point in time wherein such changes in the suicide rate occurred  
19 coincided with that wherein the government-led suicide prevention programs were  
20 implemented. Accordingly, further government-level investments and interventions should be  
21 considered to reduce the suicide rate.  
22  
23  
24  
25  
26  
27  
28  
29  
30  
31  
32  
33  
34  
35  
36  
37  
38  
39  
40  
41  
42  
43  
44

## 45 **Conclusion**

46  
47 This study showed that the suicide rate among Korean men and women has decreased  
48 since 2010, based on the causes of death statistics, which could represent the general  
49 population of South Korea. Our findings also showed that there were significant changes in  
50 trends Korea's suicide rate after 2004 to 2005 and 2008 to 2011. These changes in suicide  
51  
52  
53  
54

1  
2  
3  
4 rate coincided with those when the 2<sup>nd</sup> suicide prevention initiative enacted in 2009. In this  
5  
6 regard, it is considered that government-level suicide prevention interventions had a potential  
7  
8 effect on decreasing the suicide rate, and national-level efforts are still needed in the future to  
9  
10 reduce the increasing suicide rate of men in their 30s and 40s.  
11  
12  
13

#### 14 **Author contributions**

15  
16 S-U Lee obtained, analysed the data and wrote the manuscript and J-I P, S Lee, I-H Oh and  
17  
18 J-M Choi interpreted the data and contributed to revise the manuscript. C-M Oh made the  
19  
20 research design and revised the manuscript.  
21  
22  
23  
24

#### 25 **Funding sources**

26  
27 This work was supported by a grant from Kyung Hee University in 2017 (grant: KHU-  
28  
29 20170835).  
30  
31  
32  
33

#### 34 **Conflicts of interests**

35  
36 On behalf of all the authors, the corresponding author declares that there are no conflicts of  
37  
38 interests.  
39  
40  
41  
42

#### 43 **Patient consent**

44  
45 This study was a descriptive epidemiologic study using the cause of death database that  
46  
47 could not identify individuals. Therefore, patient consent form was exempted from IRB.  
48  
49  
50

#### 51 **Acknowledgments**

52  
53 All authors participated in the design, execution, and analysis of the results and have read  
54  
55

1  
2  
3  
4 and approved the final version. We are especially thankful for the advice and help of the  
5  
6 staffs and colleagues of the Korea Suicide Prevention Center. There was no role or  
7  
8 participation of patients in our study.  
9

### 10 11 12 **Ethical Standards** 13

14 The study protocol was reviewed and approved by Institutional Review Board of Kyung  
15  
16 Hee University (IRB No. KHSIRB-17-086).  
17  
18  
19  
20

### 21 **Data sharing statement** 22

23 All data used in this study can be obtained from Homepage of Statistic Korea  
24  
25 (<http://kosis.kr/eng/>).  
26  
27  
28  
29  
30  
31  
32  
33  
34  
35  
36  
37  
38  
39  
40  
41  
42  
43  
44  
45  
46  
47  
48  
49  
50  
51  
52  
53  
54

## REFERENCES

1. World Health Organisation. Suicide Data.  
[http://www.who.int/mental\\_health/prevention/suicide](http://www.who.int/mental_health/prevention/suicide). (Accessed on 14 September 2017).
2. World Health Organisation. Mental health action plan 2013–2020.  
[http://www.who.int/mental\\_health/publications/action\\_plan/en/](http://www.who.int/mental_health/publications/action_plan/en/). (Accessed on 14 September 2017).
3. Hendin H, Phillips MR, Vijayakumar L, Pirkis J, Wang H, Yip P, Wasserman D, Bertolote JM, Fleischmann A. Suicide and suicide prevention in Asia. World Health Organization: Geneva, 2018.
4. Organization for Economic Co-operation and Development. OECD health data 2016.  
<https://data.oecd.org/healthstat/suicide-rates.htm>. (Accessed on 14 September 2017).
5. Statistics Korea. Cause-of-Death Statistics 2017. <http://kosis.kr/en>. (Accessed on 14 September 2017).
6. Paik JW, Jo SJ, Lee S, Ong JY, Park JI. The Effect of Korean Standardized Suicide

- 1  
2  
3  
4 Prevention Program on Intervention by Gatekeepers. J Korean Neuropsychiatr Assoc  
5  
6 2014;53:358-363. [In Korean].  
7
- 8 7. Korea Suicide Prevention Center. Suicide White Book. Seoul: Ministry of Health and  
9  
10 Welfare, 2014 [In Korean].  
11
- 12 8. Korea Suicide Prevention Center. Suicide White Book. Seoul: Ministry of Health and  
13  
14 Welfare, 2015 [In Korean].  
15
- 16 9. Korea Suicide Prevention Center. Suicide White Book. Seoul: Ministry of Health and  
17  
18 Welfare, 2016 [In Korean].  
19
- 20 10. Korea Suicide Prevention Center Suicide White Book. Seoul: Ministry of Health and  
21  
22 Welfare, 2017 [In Korean].  
23
- 24 11. Kang HG. Social Welfare Delivery Reform: Achievements and Beyond, Health and  
25  
26 Welfare Policy Forum 2012;4:35-49  
27
- 28 12. Lee SY. Policy options for the improvement of suicide prevention programs. Health and  
29  
30 Welfare Policy Forum 2015;4:34-49.  
31
- 32 13. Kim HJ, Fay MP, Feuer EJ, Midthune DN. Permutation tests for joinpoint regression with  
33  
34 applications to cancer rates. Stat Med 2000;19:335-351.  
35
- 36 14. Matsubayashi T, Ueda M. The effect of national suicide prevention programs on suicide  
37  
38 rates in 21 OECD nations. Soc Sci Med 2011;73:1395-400.  
39
- 40 15. National Mental Health and Welfare Commission. Guidelines for mental health services,  
41  
42 Seoul: Ministry of Health and Welfare 2005 [In Korean].  
43
- 44 16. Park JI, Nam YY, Lee HK, Park JY, Lee MS, Lee SJ. National suicide prevention plan.  
45  
46 Seoul: Ministry of Health and Welfare, 2011 [In Korean].  
47
- 48 17. De Leo D, Buono MD, Dwyer J. Suicide among the elderly: the long-term impact of a  
49  
50 telephone support and assessment intervention in northern Italy. Br J Psychiatry  
51  
52  
53  
54

- 2002;181: 226-9.
18. De Leo D, Carollo G, Buono MD. Lower suicide rates associated with a Tele-Help/Tele-Check service for the elderly at home. *Am J Psychiatry* 1995;152: 632-4.
19. Sun HJ. Suicide prevention efforts for the elderly in Korea. *Perspect Public Health* 2016;136:269-70.
20. Jeong J, Shin SD, Kim H, Hong YC, Hwang SS, Lee EJ. The effects of celebrity suicide on copycat suicide attempt: a multi-center observational study. *Soc Psychiatry Psychiatr Epidemiol* 2012;47:957-65.
21. Niederkrotenthaler T, Fu KW, Yip PS, Fong DY, Stack S, Cheng Q, Pirkis J. Changes in suicide rates following media reports on celebrity suicide: a meta-analysis. *J Epidemiol Community Health* 2012;66:1037-42.
22. Ju Ji N, Young Lee W, Seok Noh M, Yip PS. The impact of indiscriminate media coverage of a celebrity suicide on a society with a high suicide rate: epidemiological findings on copycat suicides from South Korea. *J Affect Disord* 2014;156:56-61.
23. Chung YW, Kang SJ, Matsubayashi T, Sawada Y, Ueda M. The effectiveness of platform screen doors for the prevention of subway suicides in South Korea. *J Affect Disord*. 2016 ;194:80-3.
24. Cha ES, Chang SS, Gunnell D, Eddleston M, Khang YH, Lee WJ. Impact of paraquat regulation on suicide in South Korea. *Int J Epidemiol* 2015;45:470-9.
25. Zalsman G, Hawton K, Wasserman D, van Heeringen K, Arensman E, Sarchiapone M, Carli V, Höschl C, Barzilay R, Balazs J, Purebl G, Kahn JP, Sáiz PA, Lipsicas CB, Bobes J, Cozman D, Hegerl U, Zohar J. Suicide prevention strategies revisited: 10-year systematic review. *Lancet Psychiatry* 2016;3:646-59.
26. Korea Health Promotion Institute. Health Plan 2020. <http://www.khealth.or.kr/healthplan>.



(Accessed on 24 April 2018).

- 1  
2  
3  
4  
5  
6  
7  
8  
9  
10  
11  
12  
13  
14  
15  
16  
17  
18  
19  
20  
21  
22  
23  
24  
25  
26  
27  
28  
29  
30  
31  
32  
33  
34  
35  
36  
37  
38  
39  
40  
41  
42  
43  
44  
45  
46  
47  
48  
49  
50  
51  
52  
53  
54
27. Lee SU, Oh IH, Jeon HJ, Roh S. Suicide rates across income levels: Retrospective cohort data on 1 million participants collected between 2003 and 2013 in South Korea. *J Epidemiol* 2017;27:258-64.
28. Chang SS, Gunnell D, Sterne JA, Lu TH, Cheng AT. Was the economic crisis 1997–1998 responsible for rising suicide rates in East/Southeast Asia? A time–trend analysis for Japan, Hong Kong, South Korea, Taiwan, Singapore and Thailand. *Soc Sci Med*. 2009;68:1322-31.
29. Hawton K, Arensman E, Wasserman D, Hulten A, Bille-Brahe U, Bjerke T, Crepet P, Deisenhammer E, Kerkhof A, De Leo D, Michel K, Ostamo A, Philippe A, Querejeta I, Salander-Renberg E, Schmidtke A, Temesváry B. Relation between attempted suicide and suicide rates among young people in Europe. *J Epidemiol Community Health* 1998;52:191-4
- 55  
56  
57  
58  
59  
60

1  
2  
3  
4  
5  
6  
7  
8  
9  
10  
11  
12  
13  
14  
15  
16  
17  
18  
19  
20  
21  
22  
23  
24  
25  
26  
27  
28  
29  
30  
31  
32  
33  
34  
35  
36  
37  
38  
39  
40  
41  
42  
43  
44  
45  
46  
47  
48  
49  
50  
51  
52  
53  
54  
55  
56  
57  
58  
59  
60

For peer review only

**Table 1.** Baseline characteristics of suicide by sex and age group

| Characteristics                                    | Overall          | Year            |                 |                 |                 | <i>p</i> -value <sup>¶</sup> |
|----------------------------------------------------|------------------|-----------------|-----------------|-----------------|-----------------|------------------------------|
|                                                    |                  | 1993-1998       | 1999-2004       | 2005-2010       | 2011-2016       |                              |
| <b>Total number of deaths*</b>                     | 6,007,678        | 1,445,819       | 1,467,088       | 1,479,483       | 1,615,288       |                              |
| <b>Number of deaths due to suicide<sup>†</sup></b> | 249,085 (4.15%)  | 34,064 (2.36%)  | 51,413 (3.50%)  | 78,674 (5.32%)  | 84,934 (5.26%)  |                              |
| <b>Sex<sup>‡</sup></b>                             |                  |                 |                 |                 |                 | <0.0001                      |
| Men                                                | 169,963 (68.23%) | 23,733 (69.67%) | 35,619 (69.28%) | 51,525 (65.49%) | 59,086 (69.57%) |                              |
| Women                                              | 79,122 (31.77%)  | 10,331 (30.33%) | 15,794 (30.72%) | 27,149 (34.51%) | 25,848 (30.43%) |                              |
| <b>Age group<sup>§</sup></b>                       |                  |                 |                 |                 |                 | <0.0001                      |
| 10-19 years                                        | 7,712 (3.1%)     | 2,338 (6.9%)    | 1,629 (3.2%)    | 1,936 (2.5%)    | 1,809 (2.1%)    |                              |
| 20-29 years                                        | 29,988 (12.0%)   | 7,108 (20.9%)   | 6,306 (12.3%)   | 9,097 (11.6%)   | 7,477 (8.8%)    |                              |
| 30-39 years                                        | 43,015 (17.3%)   | 7,800 (22.9%)   | 9,654 (18.8%)   | 12,575 (16.0%)  | 12,986 (15.3%)  |                              |
| 40-49 years                                        | 47,796 (19.2%)   | 5,815 (17.1%)   | 10,468 (20.4%)  | 14,938 (19.0%)  | 16,575 (19.5%)  |                              |
| 50-59 years                                        | 41,960 (16.8%)   | 4,701 (13.8%)   | 7,705 (15.0%)   | 12,593 (16.0%)  | 16,961 (20.0%)  |                              |
| 60-69 years                                        | 33,214 (13.3%)   | 3,259 (9.6%)    | 7,441 (14.5%)   | 11,615 (14.8%)  | 10,899 (12.8%)  |                              |
| 70-79 years                                        | 29,654 (11.9%)   | 2,142 (6.3%)    | 5,389 (10.5%)   | 10,337 (13.1%)  | 11,786 (13.9%)  |                              |
| ≥80 years                                          | 15,661 (6.3%)    | 873 (2.6%)      | 2,800 (5.5%)    | 5,557 (7.1%)    | 6,431 (7.6%)    |                              |

\*Total number of deaths present the overall cause of deaths.

<sup>†</sup>The denominator for percentage of number of deaths due to suicide was total number of deaths.

<sup>‡</sup>The number and percentage of death due to suicide by sex and age group were presented among people aged ≥ 10 years old.

<sup>§</sup> The number and percentage of death due to suicide by sex and age group were presented among people aged ≥ 10 years old.

<sup>¶</sup>Chi-square test was used to test the differences in the number of deaths by sex and age group

1  
2  
3  
4  
5  
6  
7  
8  
9  
10  
11  
12  
13  
14  
15  
16  
17  
18  
19  
20  
21  
22  
23  
24  
25  
26  
27  
28  
29  
30  
31  
32  
33  
34  
35  
36  
37  
38  
39  
40  
41  
42  
43  
44  
45  
46  
47

**Table 2.** The number of death from suicide, suicide rates from 1993 to 2016 in South Korea

| Year | Population | Number of suicide death | Age-standardized suicide rate* |
|------|------------|-------------------------|--------------------------------|
| 1993 | 44,752,157 | 4,208                   | 10.7                           |
| 1994 | 45,208,726 | 4,277                   | 10.7                           |
| 1995 | 45,637,184 | 4,930                   | 12.1                           |
| 1996 | 46,062,143 | 5,959                   | 14.4                           |
| 1997 | 46,475,163 | 6,068                   | 14.5                           |
| 1998 | 46,837,620 | 8,622                   | 20.4                           |
| 1999 | 47,163,425 | 7,056                   | 16.5                           |
| 2000 | 47,534,117 | 6,444                   | 14.9                           |
| 2001 | 47,877,049 | 6,911                   | 15.7                           |
| 2002 | 48,125,745 | 8,612                   | 19.2                           |
| 2003 | 48,308,386 | 10,898                  | 23.7                           |
| 2004 | 48,485,314 | 11,492                  | 24.6                           |
| 2005 | 48,683,040 | 12,011                  | 25.1                           |
| 2006 | 48,887,027 | 10,653                  | 21.7                           |
| 2007 | 49,130,354 | 12,174                  | 24.3                           |
| 2008 | 49,404,648 | 12,858                  | 25.1                           |
| 2009 | 49,656,756 | 15,412                  | 29.5                           |
| 2010 | 49,879,812 | 15,566                  | 29.1                           |
| 2011 | 50,111,476 | 15,906                  | 29.1                           |
| 2012 | 50,345,325 | 14,160                  | 25.3                           |
| 2013 | 50,558,952 | 14,427                  | 25.3                           |
| 2014 | 50,763,158 | 13,836                  | 24.0                           |
| 2015 | 50,951,719 | 13,513                  | 22.8                           |
| 2016 | 51,112,972 | 13,092                  | 21.9                           |

\*Age-standardized rates were expressed per 100,000 people and Korean mid-year population in year 2005 was used for age-standardization. Data was obtained from Statistics Korea (Available from: <http://kosis.kr/>)

**Table 3.** Joinpoint regression analysis for suicide rate from 1993 to 2016 in Korean by age group

| Categories      | Suicide rate |        | Trend 1   |                         | Trend 2   |                          | Trend 3   |                           | Trend 4   |                          |
|-----------------|--------------|--------|-----------|-------------------------|-----------|--------------------------|-----------|---------------------------|-----------|--------------------------|
|                 | 1993         | 2016   | Years     | APC (95% CI)            | Years     | APC (95% CI)             | Years     | APC (95% CI)              | Years     | APC (95% CI)             |
| <b>Men</b>      |              |        |           |                         |           |                          |           |                           |           |                          |
| 10-19 years old | 5.35         | 5.57   | 1993-1998 | 4.8% (-5.2% to 16.0%)   | 1998-2001 | -14.7% (-48.4% to 40.9%) | 2001-2016 | 2.8% (0.5% to 5.2%)*      |           |                          |
| 20-29 years old | 14.44        | 19.91  | 1993-2006 | 0.5% (-1.6% to 2.7%)    | 2006-2010 | 12.1% (-7.3% to 35.6%)   | 2010-2016 | -5.8% (-11.7% to 0.5%)    |           |                          |
| 30-39 years old | 15.53        | 31.32  | 1993-2016 | 3.0% (2.1% to 4.0%)*    |           |                          |           |                           |           |                          |
| 40-49 years old | 18.39        | 42.34  | 1993-1998 | 15.6% (3.0% to 29.8%)*  | 1998-2016 | 1.9% (0.8% to 2.9%)*     |           |                           |           |                          |
| 50-59 years old | 23.92        | 48.32  | 1993-2004 | 8.0% (4.6% to 11.5%)*   | 2004-2016 | -0.2% (-1.9% to 1.6%)    |           |                           |           |                          |
| 60-69 years old | 26.58        | 55.74  | 1993-2005 | 10.7% (7.8% to 13.7%)*  | 2005-2016 | -3.6% (-5.5% to -1.7%)*  |           |                           |           |                          |
| 70-79 years old | 34.38        | 90.32  | 1993-2004 | 12.9% (9.9% to 16.0%)*  | 2004-2011 | 1.2% (-2.2% to 4.7%)     | 2011-2016 | -7.5% (-11.2% to -3.5%)*  |           |                          |
| ≥80 years old   | 41.74        | 150.52 | 1993-2000 | 9.2% (2.3% to 16.7%)*   | 2000-2003 | 29.7% (-3.3% to 74.0%)   | 2003-2010 | 0.9% (-2.4% to 4.3%)      | 2010-2016 | -6.2% (-8.8% to -3.6%)*  |
| <b>Women</b>    |              |        |           |                         |           |                          |           |                           |           |                          |
| 10-19 years old | 3.01         | 4.15   | 1993-1998 | 14.4% (5.2% to 24.3%)*  | 1998-2001 | -21.4% (-47.0% to 16.6%) | 2001-2009 | 8.0% (2.3% to 14.0%)*     | 2009-2016 | -5.1% (-10.0% to -0.0%)* |
| 20-29 years old | 6.97         | 12.46  | 1993-1998 | 10.0% (-1.3% to 22.5%)  | 1998-2001 | -14.8% (-47.7% to 38.8%) | 2001-2008 | 19.9% (12.0% to 28.5%)*   | 2008-2016 | -9.5% (-13.3% to -5.6%)* |
| 30-39 years old | 8.07         | 17.65  | 1993-2006 | 5.0% (3.2% to 6.8%)*    | 2006-2009 | 20.8% (-4.4% to 52.5%)   | 2009-2016 | -5.9% (-8.9% to -2.8%)*   |           |                          |
| 40-49 years old | 7.57         | 16.47  | 1993-2010 | 6.5% (5.4% to 7.7%)*    | 2010-2016 | -3.3% (-6.8% to 0.3%)    |           |                           |           |                          |
| 50-59 years old | 5.47         | 16.35  | 1993-2010 | 6.6% (5.0% to 8.2%)*    | 2010-2016 | -5.5% (-8.6% to 0.0%)    |           |                           |           |                          |
| 60-69 years old | 9.10         | 14.65  | 1993-2005 | 9.4% (7.5% to 11.4%)*   | 2005-2010 | 0.7% (-5.4% to 7.3%)     | 2010-2016 | -8.7% (-11.9% to -5.5%)*  |           |                          |
| 70-79 years old | 12.19        | 26.50  | 1993-2004 | 13.5% (11.0% to 16.1%)* | 2004-2011 | -1.5% (-4.6% to 1.7%)    | 2011-2016 | -9.9% (-13.9% to -5.8%)*  |           |                          |
| ≥80 years old   | 17.21        | 45.73  | 1993-2004 | 18.0% (14.3% to 21.8%)* | 2004-2011 | -1.3% (-5.1% to 2.5%)    | 2011-2016 | -11.5% (-15.8% to -6.9%)* |           |                          |

Joinpoint regression model is used to test that age-standardized rates have significantly changed. The trends in suicide mortality rates were summarized as APC (annual percentage change).

1  
2  
3  
4  
5  
6  
7  
8  
9  
10  
11  
12  
13  
14  
15  
16  
17  
18  
19  
20  
21  
22  
23  
24  
25  
26  
27  
28  
29  
30  
31  
32  
33  
34  
35  
36  
37  
38  
39  
40  
41  
42  
43  
44  
45  
46  
47

Age-standardized rates were expressed per 100,000 men and Korean mid-year population in year 2005 was used for age-standardization.  
APC: annual percentage change, CI: confidence interval.  
\**p*-value <0.05

For peer review only

1  
2  
3  
4  
5 **Figure legends**  
6

7  
8 **Figure 1.** Trends in age-standardized suicide rates in South Korea, 1993-2016  
9

10 Footnotes:

11 APC=Annual percent change

12  
13 The age-standardized suicide rates are presented as suicide death cases per 100,000 people using Korean mid-year population in 2005 as  
14 standard population.  
15

16 Joinpoint regression analysis was used to determine whether there were significant changes in trends in age-standardized suicide rates for the  
17 period between 1993 and 2016.  
18

19 \*p<0.05  
20  
21  
22  
23

24 **Figure 2.** Implementation of National Suicide Prevention Program and Plan  
25

26 Footnotes:

27  
28 The age-standardized suicide rates are presented as connected line from 1993 to 2016.  
29

30 Each number represents the year in which the major events related to national suicide prevention program or plan were occurred.  
31  
32  
33  
34  
35  
36  
37  
38  
39  
40  
41  
42  
43  
44  
45  
46  
47

1  
2  
3  
4  
5  
6  
7  
8  
9  
10  
11  
12  
13  
14  
15  
16  
17  
18  
19  
20  
21  
22  
23  
24  
25  
26  
27  
28  
29  
30  
31  
32  
33  
34  
35  
36  
37  
38  
39  
40  
41  
42  
43  
44  
45  
46  
47  
48  
49  
50  
51  
52  
53  
54  
55  
56  
57  
58  
59  
60

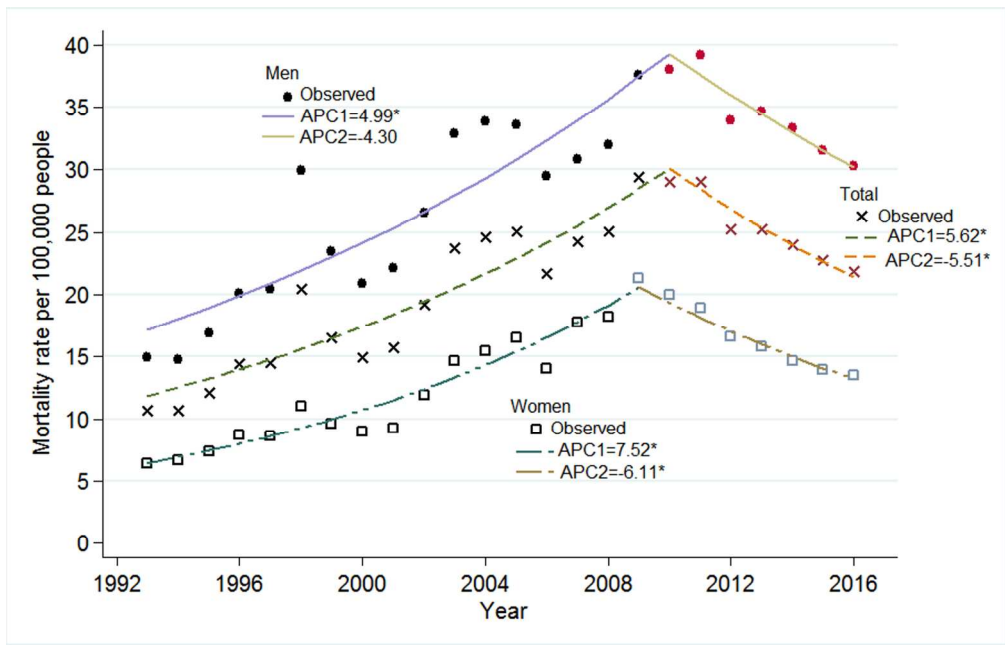

Figure 1. Trends in age-standardized suicide rates in South Korea, 1993-2016

141x90mm (300 x 300 DPI)



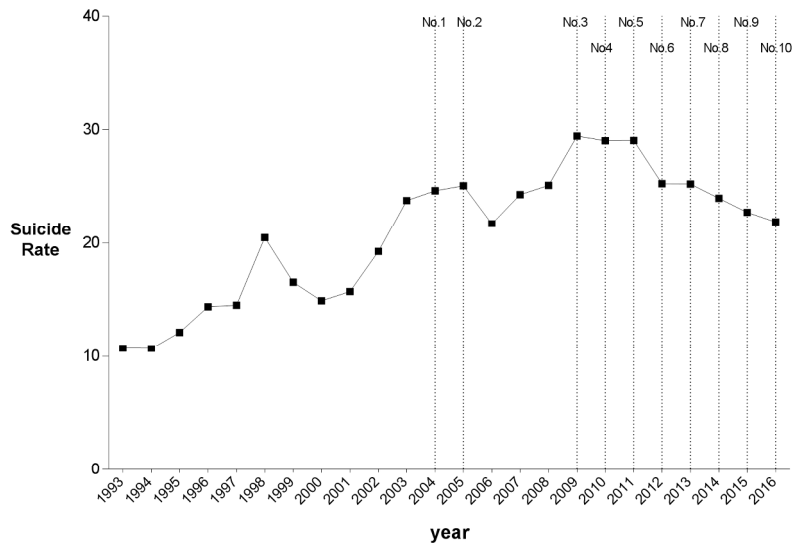

| No. | Year | National suicide prevention program or plan                                                                                                                        |
|-----|------|--------------------------------------------------------------------------------------------------------------------------------------------------------------------|
| 1   | 2004 | The establishment of the first 5-year National Strategy for Suicide Prevention                                                                                     |
| 2   | 2005 | Suicide prevention program was introduced into regional mental welfare centers                                                                                     |
| 3   | 2009 | The establishment of the second 5-year National Strategy for Suicide Prevention                                                                                    |
| 4   | 2010 | The establishment of integrated welfare system<br>The expansion of the basic living subsidies<br>The increase in the number of welfare officers                    |
| 5   | 2011 | The enactment of the Act on Preventing Suicide<br>The inhibition of sales of paraquat pesticides                                                                   |
| 6   | 2012 | The enforcement of the Act on Preventing Suicide<br>The introduction of the Korean gatekeeper program for suicide prevention entitled "Look and Listening and Say" |
| 7   | 2013 | The introduction of management of emergency department based suicide attempts<br>The certification of private suicide prevention                                   |
| 8   | 2014 | The collaboration the government with religious organizations<br>The establishment of the Korea Psychological Autopsy Center                                       |
| 9   | 2015 | The expansion of screen door on the subway<br>"Are you okay" campaign                                                                                              |
| 10  | 2016 | The establishment of the comprehensive national mental health care strategy<br>"Air kiss" campaign                                                                 |

Figure 2. Implementation of National Suicide Prevention Program and Plan

275x399mm (300 x 300 DPI)

STROBE Statement—Checklist of items that should be included in reports of *cohort studies*

|                           | Item No | Recommendation                                                                                                                                                                                                                                                                                                         | Page No                                                             |
|---------------------------|---------|------------------------------------------------------------------------------------------------------------------------------------------------------------------------------------------------------------------------------------------------------------------------------------------------------------------------|---------------------------------------------------------------------|
| <b>Title and abstract</b> | 1       | (a) Indicate the study's design with a commonly used term in the title or the abstract<br>(b) Provide in the abstract an informative and balanced summary of what was done and what was found                                                                                                                          | p.1,2<br>p.2-4                                                      |
| <b>Introduction</b>       |         |                                                                                                                                                                                                                                                                                                                        |                                                                     |
| Background/rationale      | 2       | Explain the scientific background and rationale for the investigation being reported                                                                                                                                                                                                                                   | p.5                                                                 |
| Objectives                | 3       | State specific objectives, including any prespecified hypotheses                                                                                                                                                                                                                                                       | p.5<br>line8-10                                                     |
| <b>Methods</b>            |         |                                                                                                                                                                                                                                                                                                                        |                                                                     |
| Study design              | 4       | Present key elements of study design early in the paper                                                                                                                                                                                                                                                                | p.1,2,7                                                             |
| Setting                   | 5       | Describe the setting, locations, and relevant dates, including periods of recruitment, exposure, follow-up, and data collection                                                                                                                                                                                        | p.6<br>Line1-10                                                     |
| Participants              | 6       | (a) Give the eligibility criteria, and the sources and methods of selection of participants. Describe methods of follow-up<br>(b) For matched studies, give matching criteria and number of exposed and unexposed                                                                                                      | p.6<br>Line1-10<br>-                                                |
| Variables                 | 7       | Clearly define all outcomes, exposures, predictors, potential confounders, and effect modifiers. Give diagnostic criteria, if applicable                                                                                                                                                                               | p.6<br>Line9-10, 17-24                                              |
| Data sources/measurement  | 8*      | For each variable of interest, give sources of data and details of methods of assessment (measurement). Describe comparability of assessment methods if there is more than one group                                                                                                                                   | p.6<br>Line17-24                                                    |
| Bias                      | 9       | Describe any efforts to address potential sources of bias                                                                                                                                                                                                                                                              | p.15<br>Line16-17<br>p.16, 17<br>Line 9                             |
| Study size                | 10      | Explain how the study size was arrived at                                                                                                                                                                                                                                                                              | p.8<br>Line 9-14                                                    |
| Quantitative variables    | 11      | Explain how quantitative variables were handled in the analyses. If applicable, describe which groupings were chosen and why                                                                                                                                                                                           | p.7<br>Line 9-12                                                    |
| Statistical methods       | 12      | (a) Describe all statistical methods, including those used to control for confounding<br>(b) Describe any methods used to examine subgroups and interactions<br>(c) Explain how missing data were addressed<br>(d) If applicable, explain how loss to follow-up was addressed<br>(e) Describe any sensitivity analyses | p.7<br>Line 8-9<br>p.8<br>Line 5<br>p.7<br>Line 9-12<br>-<br>-<br>- |
| <b>Results</b>            |         |                                                                                                                                                                                                                                                                                                                        |                                                                     |
| Participants              | 13*     | (a) Report numbers of individuals at each stage of study—eg numbers potentially eligible, examined for eligibility, confirmed eligible, included in the study, completing follow-up, and analysed<br>(b) Give reasons for non-participation at each stage                                                              | p.8<br>Line 9-14<br>-                                               |

|                          |     |                                                                                                                                                                                                                                                                                                                                                                                                                       |                                                                    |
|--------------------------|-----|-----------------------------------------------------------------------------------------------------------------------------------------------------------------------------------------------------------------------------------------------------------------------------------------------------------------------------------------------------------------------------------------------------------------------|--------------------------------------------------------------------|
|                          |     | (c) Consider use of a flow diagram                                                                                                                                                                                                                                                                                                                                                                                    | -                                                                  |
| Descriptive data         | 14* | (a) Give characteristics of study participants (eg demographic, clinical, social) and information on exposures and potential confounders<br><br>(b) Indicate number of participants with missing data for each variable of interest<br><br>(c) Summarise follow-up time (eg, average and total amount)                                                                                                                | p.8<br>Line 9-14<br><br>-<br><br>p.8<br>Line 10                    |
| Outcome data             | 15* | Report numbers of outcome events or summary measures over time                                                                                                                                                                                                                                                                                                                                                        | p.8<br>Line 10-14                                                  |
| Main results             | 16  | (a) Give unadjusted estimates and, if applicable, confounder-adjusted estimates and their precision (eg, 95% confidence interval). Make clear which confounders were adjusted for and why they were included<br><br>(b) Report category boundaries when continuous variables were categorized<br><br>(c) If relevant, consider translating estimates of relative risk into absolute risk for a meaningful time period | p.8<br>Line 22-<br>p.10 Line 23<br><br>p.7<br>Line 9-12<br>Table 2 |
| Other analyses           | 17  | Report other analyses done—eg analyses of subgroups and interactions, and sensitivity analyses                                                                                                                                                                                                                                                                                                                        | -                                                                  |
| <b>Discussion</b>        |     |                                                                                                                                                                                                                                                                                                                                                                                                                       |                                                                    |
| Key results              | 18  | Summarise key results with reference to study objectives                                                                                                                                                                                                                                                                                                                                                              | p.11 Line 23-<br>p.12 Line 5                                       |
| Limitations              | 19  | Discuss limitations of the study, taking into account sources of potential bias or imprecision. Discuss both direction and magnitude of any potential bias                                                                                                                                                                                                                                                            | p.15<br>Line 16-<br>p.16 Line 4                                    |
| Interpretation           | 20  | Give a cautious overall interpretation of results considering objectives, limitations, multiplicity of analyses, results from similar studies, and other relevant evidence                                                                                                                                                                                                                                            | p.12 Line 9-<br>p.15 Line 14                                       |
| Generalisability         | 21  | Discuss the generalisability (external validity) of the study results                                                                                                                                                                                                                                                                                                                                                 | p.12 Line 5-7<br>p.15 Line 8-14                                    |
| <b>Other information</b> |     |                                                                                                                                                                                                                                                                                                                                                                                                                       |                                                                    |
| Funding                  | 22  | Give the source of funding and the role of the funders for the present study and, if applicable, for the original study on which the present article is based                                                                                                                                                                                                                                                         | p.17<br>Line 2-4                                                   |

\*Give information separately for exposed and unexposed groups.

**Note:** An Explanation and Elaboration article discusses each checklist item and gives methodological background and published examples of transparent reporting. The STROBE checklist is best used in conjunction with this article (freely available on the Web sites of PLoS Medicine at <http://www.plosmedicine.org/>, Annals of Internal Medicine at <http://www.annals.org/>, and Epidemiology at <http://www.epidem.com/>). Information on the STROBE Initiative is available at <http://www.strobe-statement.org>.

# BMJ Open

## Changing trends in suicide rates in South Korea from 1993 to 2016: A descriptive study

|                                 |                                                                                                                                                                                                                                                                                                                                                                                                                                                             |
|---------------------------------|-------------------------------------------------------------------------------------------------------------------------------------------------------------------------------------------------------------------------------------------------------------------------------------------------------------------------------------------------------------------------------------------------------------------------------------------------------------|
| Journal:                        | <i>BMJ Open</i>                                                                                                                                                                                                                                                                                                                                                                                                                                             |
| Manuscript ID                   | bmjopen-2018-023144.R2                                                                                                                                                                                                                                                                                                                                                                                                                                      |
| Article Type:                   | Research                                                                                                                                                                                                                                                                                                                                                                                                                                                    |
| Date Submitted by the Author:   | 26-Jun-2018                                                                                                                                                                                                                                                                                                                                                                                                                                                 |
| Complete List of Authors:       | Lee, Sang Uk; National Center for Mental Health, Mental Health Research Park, Jong-Ik; Kangwon National University School of Medicine, Department of Psychiatry<br>Lee, Soojung; Kyungnam University, Department of Nursing<br>Oh, In-Hwan; Kyung Hee University, Department of Preventive Medicine<br>Choi, Joong-Myung ; Kyung Hee University, Department of Preventive Medicine<br>Oh, Chang-Mo; Kyung Hee University, Department of Preventive Medicine |
| <b>Primary Subject Heading</b>: | Mental health                                                                                                                                                                                                                                                                                                                                                                                                                                               |
| Secondary Subject Heading:      | Epidemiology, Health policy, Public health                                                                                                                                                                                                                                                                                                                                                                                                                  |
| Keywords:                       | Suicide & self-harm < PSYCHIATRY, Mortality, Social and political issues, Prevention, Republic of Korea                                                                                                                                                                                                                                                                                                                                                     |
|                                 |                                                                                                                                                                                                                                                                                                                                                                                                                                                             |

SCHOLARONE™  
Manuscripts

Only

1  
2  
3  
4 **Changing trends in suicide rates in South Korea from 1993 to**  
5  
6  
7 **2016: A descriptive study**  
8  
9  
10

11 Running title: Trends in suicide in South Korea  
12  
13

14  
15  
16 Sang-Uk Lee<sup>1,2</sup>, Jong-Ik Park<sup>3</sup>, Soojung Lee<sup>4</sup>, In-Hwan Oh<sup>2</sup>, Joong-Myung Choi<sup>2</sup>, Chang-Mo  
17  
18 Oh<sup>2\*</sup>  
19  
20

21  
22  
23 <sup>1</sup>Department of Mental Health Research, National Center for Mental Health, Seoul, Republic  
24  
25 of Korea

26  
27 <sup>2</sup>Department of Preventive Medicine, School of Medicine, Kyung Hee University, Seoul,  
28  
29 Republic of Korea

30  
31 <sup>3</sup>Department of Psychiatry, Kangwon National University School of Medicine, Chunchon,  
32  
33 Republic of Korea

34  
35 <sup>4</sup> Department of Nursing, Kyungnam University, Changwon, Republic of Korea  
36  
37

38  
39  
40 **Corresponding author:** Chang-Mo Oh, MD, PhD

41  
42 Department of Preventive Medicine, School of Medicine, Kyung Hee University,  
43  
44 Kyungheedaero, Dongdaemun-gu, Seoul, 02447, Republic of Korea

45  
46 Tel: +82-2-961-2265 Fax: +82-969-0792

47  
48 E-mail: kachas@naver.com  
49  
50

51  
52  
53 **Word count:** 3,746  
54

## Abstract

**Objectives:** South Korean government has recently implemented policies to prevent suicide. However, there were few studies examining the recent changing trend in suicide rates. This study aims to examine the changing trend in suicide rates by time and age group.

**Design:** A descriptive study using nationwide mortality rates

**Setting:** Data on the nationwide cause of death from 1993 to 2016 were obtained from the Statistics Korea.

**Participants:** People living in the South Korea

**Interventions:** Implementation of national suicide prevention policies (1<sup>st</sup>: 2004 year, 2<sup>nd</sup>: 2009 year)

**Primary outcome measures:** Suicide was defined as “X60-X84” code according to the ICD-10 code. Age-standardized suicide rates were estimated, and a Joinpoint regression model was applied to describe the trends in suicide rate.

**Results:** From 2010 to 2016, the suicide rates in South Korea have been decreasing by 5.5% (95% CI: -10.3% to -0.5%) annually. In terms of sex, the suicide rate for men had increased by 5.0% (95% CI: 3.6% to 6.4%) annually from 1993 to 2010. However, there has been no statistically significant change from 2010 to 2016. For women, the suicide rate had increased by 7.5% (95% CI: 6.3% to 8.7%) annually from 1993 to 2009, but since 2009, the suicide rate has been significantly decreasing by 6.1% (95% CI: -9.1% to -3.0%) annually until 2016. In terms of the age group, the suicide rates among women of almost all age groups have been decreasing since 2010; however, the suicide rates of men aged between 30 and 49 years showed continuously increasing trends.

**Conclusion:** Our results showed that there were differences in the changing trends in suicide rate by sex and age groups. Our finding suggests that there was a possible relationship

1  
2  
3  
4 between implementation of second national suicide prevention policies and a decline in  
5  
6 suicide rate.  
7  
8  
9

10 **Keywords:** Suicide; Mortality; Social and political issues; Prevention; Republic of Korea  
11  
12  
13  
14  
15  
16  
17  
18  
19  
20  
21  
22  
23  
24  
25  
26  
27  
28  
29  
30  
31  
32  
33  
34  
35  
36  
37  
38  
39  
40  
41  
42  
43  
44  
45  
46  
47  
48  
49  
50  
51  
52  
53  
54

For peer review only

## Article Summary

### Strengths and limitations of this study

- Our findings show that efforts to reduce suicide at the national level may lead to a decline in suicide rates especially among elderly people through natural experiment.
- Another finding of our study is that suicide rates in men in their 30s and 40s are continuing to increase, suggesting that a different suicide prevention strategy may be necessary in South Korea.
- Because this study is a descriptive epidemiologic study, it is difficult to know exactly which policies have reduced suicide rates in which age group.
- Improved accuracy of statistics on the causes of death may affect to changes in suicide rates.



## Introduction

Suicide is a major public health issue, with an estimated 788,000 deaths every year according to the World Health Organization (WHO) statistics.<sup>1</sup> The WHO established the Mental Health Action 2013-2020 plan to implement a national, multi-sectorial promotion and prevention program for promoting mental health and reducing suicide rates of each country by 10% until 2020.<sup>2</sup> Especially, the developed countries in East Asia have relatively high mortality rates due to suicide.<sup>3</sup> Among these countries, suicide in South Korea is a serious health problem because the suicide rate in South Korea in 2013 (28.5 per 100,000 person-years) was 2.4 times higher than the average suicide rates of other Organization for Economic Co-operation and Development (OECD) countries and South Korea has been ranked top among the OECD countries in terms of suicide rates in the last 10 years.<sup>4</sup> In addition, suicide was the most common cause of death in young people aged between 10 and 39 years, and it was the second-most common cause of death among adults aged 40-59 years in 2016 in South Korea.<sup>5</sup>

South Korea implemented the national suicide prevention program in the early 2000s.<sup>6</sup> This national suicide prevention program includes both high-risk group-oriented monitoring and prevention of suicide and suicide prevention program for general population such as media campaign.<sup>7</sup> However, there was a few studies to examine the trends in suicide rates by sex and age group with regard to the national suicide prevention policies in South Korea. Therefore, this study aimed to describe the changing trends in suicide rate by sex and age group in South Korea and exploring the potential effects of implementation of the national suicide prevention policies.

## Method

### *Study participants*

The cause of death statistics is a reliable source of data on how the causes of death have changed because of socioeconomic changes and public health developments; it also provides comprehensive information to plan and prioritize health care policies. The number of deaths due to suicide and the corresponding mid-year population counts from 1993 to 2016 were obtained from Statistic Korea (Available from <http://kosis.kr/>). The Statistic Korea used the estimated population as the denominator for mortality rates before year 1993. After 1993, Statistic Korea used the mid-year population based on resident registration number as the denominator for mortality rates. In addition, the cause of death data before 1993 is less accurate, therefore, we selected the suicide rates from 1993 to 2016. The code assigned to the cause of death due to suicide was “X60-X84” according to the ICD-10 code.

### *Patient and Public Involvement*

We did not contact with patients and our study was not directly associated with patients, because we used the administrative secondary data – the cause of death data from Statistic Korea. There was no role or participation of patients in our study.

### *National suicide prevention program*

Information regarding the timing and implementation of the national suicide prevention policy in South Korea were obtained from relevant government data and expert consultants. Initially, the timing and details of the national suicide prevention policy were obtained from the national knowledge information system (<https://nkis.re.kr:4445/main.do>) and publications from Korea Suicide Prevention Center.<sup>7-10</sup> The contents and details obtained from these

1  
2  
3  
4 websites were confirmed after review by the experts and staffs of Korea Suicide Prevention  
5 Center.<sup>6-12</sup>  
6  
7  
8  
9

### 10 ***Ethics statement***

11  
12 The study protocol was reviewed by the Institutional Review Board of Kyung Hee  
13 University (IRB No.KHSIRB-17-086). Our study was exempted from review because it was  
14 not an experimental trial, which required contacting the patients, and our study did not  
15 include personal identifiable information.  
16  
17  
18  
19  
20  
21  
22

### 23 ***Statistical analysis***

24  
25 To describe the baseline characteristics of people who die due to suicide, the number of  
26 deaths was presented for each 6-year period (1993-1998/1999-2004/2005-2010/2011-2016)  
27 from 1993 to 2016. Chi-square test was used to test the differences in the distribution of death  
28 due to suicide by sex and age groups. To describe the changes in suicide rates by time period,  
29 the age-standardized suicide rates of suicide were calculated. The mid-year Korean  
30 population in 2005 was used as the standard population for age-standardized suicide rates.  
31 Age-specific suicide rates were applied to the corresponding 5-year age group of the standard  
32 population. The sum of expected deaths for each 5-year age group was calculated, and the  
33 age-standardized suicide rates were calculated by dividing the sum of expected deaths by the  
34 total number of standard population. We used Joinpoint regression program to know whether  
35 there were changes in trends in mortality rates. Joinpoint statistical software was developed  
36 by the National Cancer Institute in the United States. Joinpoint regression modelling was  
37 used to test the trends in age-standardized suicide rates for suicide and detect significant  
38 changes over time to fit a better multi-segmented model compared to a simple linear model  
39  
40  
41  
42  
43  
44  
45  
46  
47  
48  
49  
50  
51  
52  
53  
54

1  
2  
3  
4 using a Monte Carlo permutation method.<sup>13</sup> Further, it could detect point where significant  
5  
6 change in rates over time. The trends in rates were summarized as annual percentage changes  
7  
8 (APCs) and their 95% confidence intervals (CIs).  
9

10 *P* values <0.05 were considered statistically significant. We used SPSS (version 23.0,  
11 Armonk, NY: IBM Corp., USA) and R software (version 3.1.1, Vienna, Austria) and  
12  
13 Joinpoint Regression Program software (Version 4.1.1, Statistical Methodology and  
14  
15 Applications Branch, Surveillance Research Program, National Cancer Institute, Bethesda,  
16  
17 MD, USA).  
18  
19  
20  
21  
22  
23  
24  
25

## 26 **Results**

### 27 *Baseline characteristics*

28  
29  
30 The total number of deaths in South Korea from 1993 to 2016 was 6,007,678 (Table 1). Of  
31  
32 these, the total number of deaths due to suicide was 249,085 (4.2%). Of the deaths due to  
33  
34 suicide, 169,963 (68.2%) were men, and 79,122 (31.8%) were women. In terms of the time  
35  
36 period, South Korea had the highest number of deaths from suicide (n=15,906) in 2011 and  
37  
38 the highest age-standardized suicide rate from suicide (29.5 per 100,000 person-year) in 2009  
39  
40 (Table 2). After 2011, the number of deaths and age-standardized suicide rates due to suicide  
41  
42 decreased until 2016. The number of deaths due to suicide in 2011-2016 was 2.5 times higher  
43  
44 than that in 1993-1998. According to the age groups, the proportion of deaths due to suicide  
45  
46 in children and adolescents aged between 10 and 19 years had decreased from 1993-1998 to  
47  
48 2011-2016, whereas the proportion of elderly aged more than 70 years had increased during  
49  
50 the same time period (p<0.0001).  
51  
52  
53  
54

### ***Trends in suicide rates***

According to the joinpoint regression model, the mortality rate from suicide had increased by 5.6% (95% CI: 4.4% to 6.9%) annually from 1993 to 2010 (Figure 1). After 2010, the suicide rate had declined by 5.5% (95% CI: -10.3% to -0.5%) annually until 2016. In terms of sex, suicide rate for men had increased by 5.0% (95% CI: 3.6% to 6.4%) annually from 1993 to 2010. After 2010, suicide rate for men shown decreasing trends (APC=-4.3%, 95% CI: -9.8% to 1.6%), although it was not statistically significant ( $p=0.14$ ). Similarly, the suicide rates for women had increased by 7.5% (95% CI: 6.3% to 8.7%) annually from 1993 to 2009. Following that, suicide rates for women showed a significant decreasing trend (APC=-6.1%, (95% CI: -9.1% to -3.0%)).

### ***Trends in suicide rates for men by age group***

Joinpoint regression analysis was performed by sex and age group. Suicide rates for men increased with age (Table 3). The suicide rate of adolescents aged 10-19 years is relatively low, ranging from 3 to 7 people per 100,000 persons. The suicide rate of adolescents aged 10-19 years has been increasing annually by 2.8% since 2001. Although there was no statistically significant change in suicide rate of young adults aged 20-29 years, the rates showed increasing trends from 2006 to 2010, and it has tended to decrease since 2010. The suicide rate of men aged 30-39 years showed a significant annual increase of 3.1% from 1993 to 2016. For men aged 40-49 years, the suicide rate dramatically increased by 15.6% annually from 1993 to 1998. Since 1998, the increasing trend in the suicide rate has attenuated among men aged 40-49 years (APC=1.9% (95% CI: 0.9% to 2.9%)). The suicide rate for men aged 50-59 years has increased by 8.0% from 1993 to 2004. However, there has been no

1  
2  
3  
4 significant increase since 2004. For men aged 60-69 years, there was a statistically significant  
5 increase in suicide rate by 10.7% increase each year between 1993 and 2005; however, there  
6 has been a decreasing trend since 2005. The suicide rate for men aged 70-79 years had  
7 increased by 12.9% annually from 1993 to 2004 but has been decreasing by 7.5% annually  
8 since 2011. For men aged 80 years and above, the suicide rate had increased by 9.2%  
9 annually between 1993 and 2000. There was no significant change in the suicide rate for men  
10 from 2000 to 2010. Since 2010, the suicide rate has been decreasing by 6.2% annually.  
11  
12  
13  
14  
15  
16  
17  
18  
19  
20

### 21 ***Trends in suicide rates for women by age group***

22  
23 Table 3 shows the suicide rate for women by age group. The suicide rate of adolescents  
24 aged 10-19 years is relatively low, and the trends of suicide rates are similar to that in the  
25 twenties. Suicide rates in women aged 20-29 years had increased by 19.9% annually from  
26 2001 to 2008. Since 2008, suicide rate for women aged 20-29 years has decreased by 9.5%  
27 annually. The suicide rate of women aged 30-39 years showed a significant annual increase of  
28 5.0% from 1993 to 2006, whereas the suicide rates tended to decrease by 5.9% annually from  
29 2009 to 2016. For women aged 40-49 years, the suicide rate had increased by 6.5% annually  
30 from 1993 to 2010. Since 2010, there was no significant change in the suicide rate. The  
31 suicide rate for women aged 50-59 years had increased by 6.6% from 1993 to 2010. After  
32 2010, the suicide rates for women aged 50-59 years showed a decreasing trend (APC=-5.5%  
33 (95% CI: -8.6% to 0.0%)). For women aged 60-69 years, there was a statistically significant  
34 increase in the suicide rate with 9.4% increase each year from 1993 to 2005; however, there  
35 has been a significant decreasing trend since 2010 (APC=-8.7% (95% CI: -11.9% to -5.5%)).  
36 The suicide rate for women aged 70-79 years increased by 13.5% annually from 1993 to 2004  
37 but has decreased significantly by 9.9% annually since 2011. For women aged 80 years and  
38  
39  
40  
41  
42  
43  
44  
45  
46  
47  
48  
49  
50  
51  
52  
53  
54

1  
2  
3  
4 above, the suicide rates had dramatically increased by 18.0% annually from 1993 to 2004.  
5  
6 There was no significant change from 2004 to 2011. Since 2011, suicide rate has decreased  
7  
8 by 11.5% annually.  
9

### 12 ***The implementation of the National Suicide Prevention Program in South Korea***

14 The first step of the national suicide prevention program was the establishment of the first  
15 5-year National Strategy for Suicide Prevention in 2004 (Figure 2). Based on this, a suicide  
16 prevention program was introduced in 2005 at regional mental health centres which were  
17 public community infrastructures for mental health. Following this, the second 5-year  
18 National Strategy for Suicide Prevention was implemented in 2009. Based on this program, a  
19 separate budget was newly proposed and executed. In 2010, a screen door was expanded to  
20 prevent suicide on the subway. In 2011, the Act for the Prevention of Suicide was passed, the  
21 Korea Suicide Prevention Center was established, and the sales of paraquat pesticides were  
22 prohibited. The Act for the Prevention of Suicide was enforced in 2012, and the Korean  
23 gatekeeper training program for suicide prevention entitled '*Watch, Listen and Talk*' was  
24 introduced to the general population in South Korea. In 2013, an emergency department-  
25 based suicide attempt survivor management program was implemented, and the Korea  
26 Suicide Prevention Center along with Journalists Association of Korea announced the  
27 recommendation for media reporting of suicide. In addition, the government authenticated the  
28 private suicide prevention program to disseminate the evidence-based suicide prevention  
29 program. In 2014, the government collaborated with religious organizations to increase the  
30 participation rates of general population in the national suicide program. The Korea  
31 Psychological Autopsy Center was established to understand the causes of suicide deaths  
32 better.  
33  
34  
35  
36  
37  
38  
39  
40  
41  
42  
43  
44  
45  
46  
47  
48  
49  
50  
51  
52  
53  
54

## Discussion

This study aimed to examine the trends of suicide rate in South Korea by sex and age group and explore these suicide rate changes according to the timing of suicide prevention policies implemented by the Korean government. This study found that the overall suicide rate in South Korea had tended to decline since 2010. However, when analysed by sex and age, the suicide rate trends showed differences according to the sex and age groups. While women's suicide rate has decreased in all age groups since 2010, the suicide rate of men aged between 30 and 49 years is still on the rise. Our findings were consistent with the study findings of Matsubayashi et al.<sup>14</sup> They showed that a national level of suicide prevention intervention was an effective way to reduce suicide rate except for working-age adults in 21 OECD countries.<sup>14</sup>

### *Trend in suicide rate after 2004/2005*

From 1993 to 2016, the suicide rates tended to change at two points in time. The suicide rates of South Korea have increased continuously from 1993 to 2010. According to the study of Kwon et al, the recent increase in suicide during 1986-2005 was mainly attributed to increase in suicide in elderly people.<sup>15</sup> The rapid social change such as the increasing tendency of smaller family size may make the elderly feel isolated. In addition, insufficient social security system and economical problem may lead to an increase in suicide rates in the elderly.<sup>15</sup> However, suicide rate of young people aged less than 45 years old have also increased significantly.<sup>15</sup> The rising economic inequality and increasing unemployment rate due to economic crisis in 1997 of Korea may contribute to the increase in suicide rate among



1  
2  
3  
4 young people. In addition, the fragmentation of social integration may have weakened the  
5  
6 social ability to overcome mental problem such as depression.<sup>15</sup>  
7

8  
9 However, our study found that the suicide rate changed before and after 2004 and 2005. It  
10  
11 was revealed that after 2004, an increase in the suicide rate of men and women aged 60 years  
12  
13 or older had changed. After 2005, the suicide rate of men in their 60s decreased by 3.6% each  
14  
15 year and that of women in their 60s, which had risen sharply up until 2005, no longer showed  
16  
17 a statistically significant increase from 2005 to 2010.  
18

19  
20 During this period, Korea's 1<sup>st</sup> national suicide prevention initiative was implemented in  
21  
22 2004, which included various programs such as mental health improvement and suicide  
23  
24 prevention, suicide prevention counseling calls, the development of a culture that respects life,  
25  
26 treatment and post-suicide attempt management for those who attempt suicide, and suicide  
27  
28 prevention research.<sup>12</sup> In addition, the Mental Health Welfare Center, a national mental health  
29  
30 system, also implemented a regional suicide prevention program in 2005, and the Seoul  
31  
32 Suicide Prevention Center was first established.<sup>16</sup> Although the 1<sup>st</sup> suicide prevention  
33  
34 initiative was implemented in 2004, the government did not earmark funding for the 1<sup>st</sup>  
35  
36 suicide prevention initiative.<sup>17</sup> In other words, this project had just added suicide prevention  
37  
38 program to the existing mental health care service without sufficient additional budgets and  
39  
40 manpower. In addition, the scope of this policy was mainly focused on the individuals with  
41  
42 mental disorder, and there was not sufficient consideration for social and environmental  
43  
44 changes. For this reason, it is difficult to find the data that can precisely identify the programs  
45  
46 that were actually implemented among various other programs. Nonetheless, a suicide  
47  
48 prevention program implemented by the Mental Health Welfare Center mainly focused on  
49  
50 management via phone calls, and it has been applied since 2005 without additional funding.  
51  
52  
53  
54

1  
2  
3  
4 Previous studies reported that interventions and management based on phone calls were  
5 effective for the suicide prevention of the elderly,<sup>18,19</sup> and in this regard, changes in the  
6 suicide rate mostly found among those aged 60 years or older can be attributed to the effect  
7 of phone-based interventions.<sup>20</sup> These changes in the suicide rate, however, were found to be  
8 not a statistically significant decline in the suicide rate overall but a change in the increasing  
9 trend of the suicide rate.  
10  
11  
12  
13  
14  
15  
16  
17  
18

### 19 ***Trend in suicide rate after 2008/2009***

20  
21 Second, the suicide rate began to decline from 2008 to 2011. As of 2008 and 2009, the  
22 suicide rate for females aged 10 to 39 years, which had increased before, began to decrease.  
23 As of 2010 and 2011, the suicide rate of women aged 40 years or older also began to decline.  
24 Furthermore, the suicide rates of men in their 20s and those aged 70 years or older tended to  
25 decline since 2010 and 2011, respectively. In contrast, the suicide rate of men aged 30-49  
26 years had not decreased significantly from 1993 to 2016; instead, it continued to rise during  
27 this period.  
28  
29  
30  
31  
32  
33  
34  
35

36 To begin with, the 2<sup>nd</sup> national suicide prevention initiative was enacted in 2009, which  
37 consisted of the research and development of suicide prevention policy, development of a  
38 culture that respects life, suicide prevention training and nurturing of specialists, online  
39 counselling and harmful suicide information monitoring, and public-private partnerships for  
40 suicide prevention.<sup>12</sup> The importance of the 2<sup>nd</sup> suicide prevention initiative is that the  
41 national budget was allocated for suicide prevention unlike the 1<sup>st</sup> suicide prevention  
42 initiative. While this initiative could be effective in reducing the suicide rate of young  
43 females in their 10s to 30s, it would be more reasonable to consider that a series of specific  
44 events contributed to a surge in the suicide rate of young women in 2008 and 2009. The  
45  
46  
47  
48  
49  
50  
51  
52  
53  
54

1  
2  
3  
4 effect of a celebrity's suicide on the suicide rate is well-known,<sup>21, 22</sup> and there were incidents  
5  
6 of suicides among very high-profile celebrities in 2008 and 2009 in South Korea, which were  
7  
8 reported across the country.<sup>7</sup> Furthermore, it was reported that the effect of a celebrity's  
9  
10 suicide in Korea was five times higher among young women.<sup>23</sup> Considering these results, it is  
11  
12 a reasonable interpretation to view a reduction in the suicide rate of young women after 2009  
13  
14 as a decline in the suicide rate surged previously due to the effect of a series of specific  
15  
16 events—celebrity suicides.  
17

18  
19 Some important national suicide prevention activities were carried out during the 2<sup>nd</sup>  
20  
21 suicide prevention initiative, such as the installation of more screen doors to prevent people  
22  
23 from throwing themselves into the subway train<sup>24</sup> and a ban on the sale of paraquat  
24  
25 pesticides.<sup>25</sup> One of the most effective suicide prevention intervention is to restrict of  
26  
27 assessment to lethal methods.<sup>26</sup> Such government-led suicide prevention interventions may  
28  
29 have contributed to the changes in the suicide rate of men in their 20s, men aged 70 years or  
30  
31 older, and women aged 40 years or older in 2010 and 2011. Moreover, a continuous decrease  
32  
33 in the suicide rate since 2011 indicates that the reduction of suicide rates was attributable to  
34  
35 the government intervention efforts. After the introduction of the national suicide prevention  
36  
37 initiative in 2009, the community mental health center has endeavoured to register and  
38  
39 manage more people with severe mental disorder and people with alcoholism. Indeed, the  
40  
41 mental health service utilization rates among people with alcoholism has increased from 8.1%  
42  
43 in 2008 to 12.1% in 2015.<sup>27</sup> The registration and management rate for patients with severe  
44  
45 mental disorder in the community mental health center has also increased from 19.2% in  
46  
47 2008 to 26.4% in 2016. In addition, the government implemented an emergency department-  
48  
49 based suicide attempt survivor management program, announced the recommendation for  
50  
51 media reporting of suicide in 2013.<sup>7</sup> Indeed, the proportion of alcohol abuse and suicidal  
52  
53  
54

1  
2  
3  
4 thoughts of those participated in emergency department-based suicide attempt survivor  
5 management program has decreased by 2.9%p and 6.8%p between the first and fourth contact,  
6  
7 respectively.<sup>28</sup>  
8  
9

### 10 11 12 ***Increase in suicide rate of men in their 30s and 40s*** 13

14  
15 Nevertheless, it was found that the suicide rate of men in their 30s and 40s had continued  
16 to increase significantly from 1993 to 2016. While there was a slight slowdown in the  
17 increase of their suicide rate due to suicide prevention programs implemented by the  
18 government, it did not result in a decrease in the suicide rate. This might suggest that the  
19 currently implemented suicide prevention programs are not effective for men in their 30s and  
20 40s. However, in Korea, suicide prevention policies focused on men in their 30s and 40s have  
21 not been implemented until now. In previous studies, men were reported to have a higher risk  
22 of suicide due to financial reasons than women do,<sup>29</sup> and the risk of suicide among men  
23 arising due to the unemployment rate and economic crisis was also shown to be higher.<sup>30,31</sup>  
24  
25 However, the current suicide prevention policies only included the development of an office  
26 worker gatekeeper program for men in their 30s and 40s.  
27  
28  
29  
30  
31  
32  
33  
34  
35  
36  
37  
38  
39  
40

### 41 ***Strengths and Limitations of this study*** 42

43  
44 When interpreting the findings of this study, the following limitations need to be  
45 considered. This study did not take account of the individual effect of a suicide prevention  
46 program; it instead interpreted the changes in suicide rates at each point in time when such  
47 programs were implemented. However, we cannot confirm when exactly the effect of policy  
48 was seen. This was because the data on the outcome of each individual suicide prevention  
49 program were not available as Korea did not have a monitoring system for each individual  
50  
51  
52  
53  
54

1  
2  
3  
4 program, even though it implemented suicide prevention programs quite extensively. In this  
5  
6 regard, a monitoring system needs to be established in order to identify the policy effect on  
7  
8 the changes in the suicide rate in Korea more accurately, and a follow-up study needs to be  
9  
10 conducted using this system. Furthermore, the accuracy of the cause of death statistics had  
11  
12 continued to improve, so there is a chance that an increase in the number of deaths due to  
13  
14 suicide would have been affected by the improved accuracy of statistics on the causes of  
15  
16 death. Despite these limitations, this study has the following strengths. This study presented  
17  
18 the trends in the suicide rates in Korea based on statistical analysis of a 24-year period. In  
19  
20 addition, it showed that the point in time wherein such changes in the suicide rate occurred  
21  
22 coincided with that wherein the government-led suicide prevention programs were  
23  
24 implemented. Accordingly, further government-level investments and interventions should be  
25  
26 considered to reduce the suicide rate.  
27  
28  
29  
30

### 31 **Conclusion**

32  
33  
34 This study showed that the suicide rate among Korean men and women has decreased  
35  
36 since 2010, based on the causes of death statistics, which could represent the general  
37  
38 population of South Korea. Our findings also showed that there were significant changes in  
39  
40 trends of Korea's suicide rate especially among elderly people after 2010 to 2011. These  
41  
42 changes in suicide rate coincided with those when the 2<sup>nd</sup> suicide prevention initiative  
43  
44 enacted in 2009. In this regard, it is considered that government-level suicide prevention  
45  
46 interventions had a potential effect on decreasing the suicide rate among elderly people, and  
47  
48 national-level efforts are still needed in the future to reduce the increasing suicide rate of men  
49  
50 in their 30s and 40s.  
51  
52  
53  
54

### **Author contributions**

S-U Lee obtained, analysed the data and wrote the manuscript and J-I P, S Lee, I-H Oh and J-M Choi interpreted the data and contributed to revise the manuscript. C-M Oh made the research design and revised the manuscript.

### **Funding sources**

This work was supported by a grant from Kyung Hee University in 2017 (grant: KHU-20170835).

### **Conflicts of interests**

On behalf of all the authors, the corresponding author declares that there are no conflicts of interests.

### **Patient consent**

This study was a descriptive epidemiologic study using the cause of death database that could not identify individuals. Therefore, patient consent form was exempted from IRB.

### **Acknowledgments**

All authors participated in the design, execution, and analysis of the results and have read and approved the final version. We are especially thankful for the advice and help of the staffs and colleagues of the Korea Suicide Prevention Center. There was no role or participation of patients in our study.

### **Ethical Standards**

1  
2  
3  
4 The study protocol was reviewed and approved by Institutional Review Board of Kyung  
5  
6 Hee University (IRB No. KHSIRB-17-086).  
7  
8  
9

#### 10 **Data sharing statement**

11  
12 All data used in this study can be obtained from Homepage of Statistic Korea  
13  
14 (<http://kosis.kr/eng/>).  
15  
16  
17  
18  
19  
20  
21  
22  
23  
24  
25  
26  
27

#### 28 **REFERENCES**

- 29  
30 1. World Health Organisation. Suicide Data.  
31  
32 [http://www.who.int/mental\\_health/prevention/suicide](http://www.who.int/mental_health/prevention/suicide). (Accessed on 14 September  
33  
34 2017).  
35  
36 2. World Health Organisation. Mental health action plan 2013–2020.  
37  
38 [http://www.who.int/mental\\_health/publications/action\\_plan/en/](http://www.who.int/mental_health/publications/action_plan/en/). (Accessed on 14  
39  
40 September 2017).  
41  
42 3. Hendin H, Phillips MR, Vijayakumar L, Pirkis J, Wang H, Yip P, Wasserman D, Bertolote  
43  
44 JM, Fleischmann A. Suicide and suicide prevention in Asia. World Health  
45  
46 Organization: Geneva, 2018.  
47  
48 4. Organization for Economic Co-operation and Development. OECD health data 2016.  
49  
50 <https://data.oecd.org/healthstat/suicide-rates.htm>. (Accessed on 14 September 2017).  
51  
52 5. Statistics Korea. Cause-of-Death Statistics 2017. <http://kosis.kr/en>. (Accessed on 14  
53  
54  
55

- 1  
2  
3  
4 September 2017).
- 5  
6 6. Paik JW, Jo SJ, Lee S, Ong JY, Park JI. The Effect of Korean Standardized Suicide  
7  
8 Prevention Program on Intervention by Gatekeepers. *J Korean Neuropsychiatr Assoc*  
9  
10 2014;53:358-363. [In Korean].
- 11  
12 7. Korea Suicide Prevention Center. *Suicide White Book*. Seoul: Ministry of Health and  
13  
14 Welfare, 2014 [In Korean].
- 15  
16 8. Korea Suicide Prevention Center. *Suicide White Book*. Seoul: Ministry of Health and  
17  
18 Welfare, 2015 [In Korean].
- 19  
20 9. Korea Suicide Prevention Center. *Suicide White Book*. Seoul: Ministry of Health and  
21  
22 Welfare, 2016 [In Korean].
- 23  
24 10. Korea Suicide Prevention Center *Suicide White Book*. Seoul: Ministry of Health and  
25  
26 Welfare, 2017 [In Korean].
- 27  
28 11. Kang HG. Social Welfare Delivery Reform: Achievements and Beyond, *Health and*  
29  
30 *Welfare Policy Forum* 2012;4:35-49
- 31  
32 12. Lee SY. Policy options for the improvement of suicide prevention programs. *Health and*  
33  
34 *Welfare Policy Forum* 2015;4:34-49.
- 35  
36 13. Kim HJ, Fay MP, Feuer EJ, Midthune DN. Permutation tests for joinpoint regression with  
37  
38 applications to cancer rates. *Stat Med* 2000;19:335-351.
- 39  
40 14. Matsubayashi T, Ueda M. The effect of national suicide prevention programs on suicide  
41  
42 rates in 21 OECD nations. *Soc Sci Med* 2011;73:1395-400.
- 43  
44 15. Kwon JW, Chun H, Cho SI. A closer look at the increase in suicide rates in South Korea  
45  
46 from 1986-2005. *BMC Public Health* 2009;9:72-80.
- 47  
48 16. National Mental Health and Welfare Commission. *Guidelines for mental health services*,  
49  
50 Seoul: Ministry of Health and Welfare 2005 [In Korean].
- 51  
52  
53  
54  
55  
56  
57  
58  
59  
60



17. Park JI, Nam YY, Lee HK, Park JY, Lee MS, Lee SJ. National suicide prevention plan. Seoul: Ministry of Health and Welfare, 2011 [In Korean].
18. De Leo D, Buono MD, Dwyer J. Suicide among the elderly: the long-term impact of a telephone support and assessment intervention in northern Italy. *Br J Psychiatry* 2002;181: 226-9.
19. De Leo D, Carollo G, Buono MD. Lower suicide rates associated with a Tele-Help/Tele-Check service for the elderly at home. *Am J Psychiatry* 1995;152: 632-4.
20. Sun HJ. Suicide prevention efforts for the elderly in Korea. *Perspect Public Health* 2016;136:269-70.
21. Jeong J, Shin SD, Kim H, Hong YC, Hwang SS, Lee EJ. The effects of celebrity suicide on copycat suicide attempt: a multi-center observational study. *Soc Psychiatry Psychiatr Epidemiol* 2012;47:957-65.
22. Niederkrotenthaler T, Fu KW, Yip PS, Fong DY, Stack S, Cheng Q, Pirkis J. Changes in suicide rates following media reports on celebrity suicide: a meta-analysis. *J Epidemiol Community Health* 2012;66:1037-42.
23. Ju Ji N, Young Lee W, Seok Noh M, Yip PS. The impact of indiscriminate media coverage of a celebrity suicide on a society with a high suicide rate: epidemiological findings on copycat suicides from South Korea. *J Affect Disord* 2014;156:56-61.
24. Chung YW, Kang SJ, Matsubayashi T, Sawada Y, Ueda M. The effectiveness of platform screen doors for the prevention of subway suicides in South Korea. *J Affect Disord*. 2016 ;194:80-3.
25. Cha ES, Chang SS, Gunnell D, Eddleston M, Khang YH, Lee WJ. Impact of paraquat regulation on suicide in South Korea. *Int J Epidemiol* 2015;45:470-9.
26. Zalsman G, Hawton K, Wasserman D, van Heeringen K, Arensman E, Sarchiapone M,

- 1  
2  
3  
4 Carli V, Höschl C, Barzilay R, Balazs J, Purebl G, Kahn JP, Sáiz PA, Lipsicas CB,  
5  
6 Bobes J, Cozman D, Hegerl U, Zohar J. Suicide prevention strategies revisited: 10-year  
7  
8 systematic review. *Lancet Psychiatry* 2016;3:646-59.  
9
- 10 27. Korea Health Promotion Institute. Health Plan 2020. <http://www.khealth.or.kr/healthplan>.  
11  
12 (Accessed on 24 April 2018).  
13
- 14 28. Korea Suicide Prevention Center. 2013-2015 Emergency Department Based Post-Suicidal  
15  
16 Care Program Report Summary. <http://www.spckorea.or.kr/> (Accessed on 25 June,  
17  
18 2018)  
19
- 20 29. Lee SU, Oh IH, Jeon HJ, Roh S. Suicide rates across income levels: Retrospective cohort  
21  
22 data on 1 million participants collected between 2003 and 2013 in South Korea. *J*  
23  
24 *Epidemiol* 2017;27:258-64.  
25  
26
- 27 30. Chang SS, Gunnell D, Sterne JA, Lu TH, Cheng AT. Was the economic crisis 1997–1998  
28  
29 responsible for rising suicide rates in East/Southeast Asia? A time–trend analysis for  
30  
31 Japan, Hong Kong, South Korea, Taiwan, Singapore and Thailand. *Soc Sci Med*.  
32  
33 2009;68:1322-31.  
34  
35
- 36 31. Hawton K, Arensman E, Wasserman D, Hulten A, Bille-Brahe U, Bjerke T, Crepet P,  
37  
38 Deisenhammer E, Kerkhof A, De Leo D, Michel K, Ostamo A, Philippe A, Querejeta I,  
39  
40 Salander-Renberg E, Schmidtke A, Temesváry B. Relation between attempted suicide  
41  
42 and suicide rates among young people in Europe. *J Epidemiol Community Health*  
43  
44 1998;52:191-4  
45  
46  
47  
48  
49  
50  
51  
52  
53  
54

1  
2  
3  
4  
5  
6  
7  
8  
9  
10  
11  
12  
13  
14  
15  
16  
17  
18  
19  
20  
21  
22  
23  
24  
25  
26  
27  
28  
29  
30  
31  
32  
33  
34  
35  
36  
37  
38  
39  
40  
41  
42  
43  
44  
45  
46  
47  
48  
49  
50  
51  
52  
53  
54  
55  
56  
57  
58  
59  
60

For peer review only

**Table 1.** Baseline characteristics of suicide by sex and age group

| Characteristics                                    | Overall          | Year            |                 |                 |                 | <i>p</i> -value <sup>¶</sup> |
|----------------------------------------------------|------------------|-----------------|-----------------|-----------------|-----------------|------------------------------|
|                                                    |                  | 1993-1998       | 1999-2004       | 2005-2010       | 2011-2016       |                              |
| <b>Total number of deaths*</b>                     | 6,007,678        | 1,445,819       | 1,467,088       | 1,479,483       | 1,615,288       |                              |
| <b>Number of deaths due to suicide<sup>†</sup></b> | 249,085 (4.15%)  | 34,064 (2.36%)  | 51,413 (3.50%)  | 78,674 (5.32%)  | 84,934 (5.26%)  |                              |
| <b>Sex<sup>‡</sup></b>                             |                  |                 |                 |                 |                 | <0.0001                      |
| Men                                                | 169,963 (68.23%) | 23,733 (69.67%) | 35,619 (69.28%) | 51,525 (65.49%) | 59,086 (69.57%) |                              |
| Women                                              | 79,122 (31.77%)  | 10,331 (30.33%) | 15,794 (30.72%) | 27,149 (34.51%) | 25,848 (30.43%) |                              |
| <b>Age group<sup>§</sup></b>                       |                  |                 |                 |                 |                 | <0.0001                      |
| 10-19 years                                        | 7,712 (3.1%)     | 2,338 (6.9%)    | 1,629 (3.2%)    | 1,936 (2.5%)    | 1,809 (2.1%)    |                              |
| 20-29 years                                        | 29,988 (12.0%)   | 7,108 (20.9%)   | 6,306 (12.3%)   | 9,097 (11.6%)   | 7,477 (8.8%)    |                              |
| 30-39 years                                        | 43,015 (17.3%)   | 7,800 (22.9%)   | 9,654 (18.8%)   | 12,575 (16.0%)  | 12,986 (15.3%)  |                              |
| 40-49 years                                        | 47,796 (19.2%)   | 5,815 (17.1%)   | 10,468 (20.4%)  | 14,938 (19.0%)  | 16,575 (19.5%)  |                              |
| 50-59 years                                        | 41,960 (16.8%)   | 4,701 (13.8%)   | 7,705 (15.0%)   | 12,593 (16.0%)  | 16,961 (20.0%)  |                              |
| 60-69 years                                        | 33,214 (13.3%)   | 3,259 (9.6%)    | 7,441 (14.5%)   | 11,615 (14.8%)  | 10,899 (12.8%)  |                              |
| 70-79 years                                        | 29,654 (11.9%)   | 2,142 (6.3%)    | 5,389 (10.5%)   | 10,337 (13.1%)  | 11,786 (13.9%)  |                              |
| ≥80 years                                          | 15,661 (6.3%)    | 873 (2.6%)      | 2,800 (5.5%)    | 5,557 (7.1%)    | 6,431 (7.6%)    |                              |

\*Total number of deaths present the overall cause of deaths.

<sup>†</sup>The denominator for percentage of number of deaths due to suicide was total number of deaths.

<sup>‡</sup>The number and percentage of death due to suicide by sex and age group were presented among people aged ≥ 10 years old.

<sup>§</sup> The number and percentage of death due to suicide by sex and age group were presented among people aged ≥ 10 years old.

<sup>¶</sup>Chi-square test was used to test the differences in the number of deaths by sex and age group

1  
2  
3  
4  
5  
6  
7  
8  
9  
10  
11  
12  
13  
14  
15  
16  
17  
18  
19  
20  
21  
22  
23  
24  
25  
26  
27  
28  
29  
30  
31  
32  
33  
34  
35  
36  
37  
38  
39  
40  
41  
42  
43  
44  
45  
46  
47

**Table 2.** The number of death from suicide, suicide rates from 1993 to 2016 in South Korea

| <b>Year</b> | <b>Population</b> | <b>Number of suicide death</b> | <b>Age-standardized suicide rate*</b> |
|-------------|-------------------|--------------------------------|---------------------------------------|
| 1993        | 44,752,157        | 4,208                          | 10.7                                  |
| 1994        | 45,208,726        | 4,277                          | 10.7                                  |
| 1995        | 45,637,184        | 4,930                          | 12.1                                  |
| 1996        | 46,062,143        | 5,959                          | 14.4                                  |
| 1997        | 46,475,163        | 6,068                          | 14.5                                  |
| 1998        | 46,837,620        | 8,622                          | 20.4                                  |
| 1999        | 47,163,425        | 7,056                          | 16.5                                  |
| 2000        | 47,534,117        | 6,444                          | 14.9                                  |
| 2001        | 47,877,049        | 6,911                          | 15.7                                  |
| 2002        | 48,125,745        | 8,612                          | 19.2                                  |
| 2003        | 48,308,386        | 10,898                         | 23.7                                  |
| 2004        | 48,485,314        | 11,492                         | 24.6                                  |
| 2005        | 48,683,040        | 12,011                         | 25.1                                  |
| 2006        | 48,887,027        | 10,653                         | 21.7                                  |
| 2007        | 49,130,354        | 12,174                         | 24.3                                  |
| 2008        | 49,404,648        | 12,858                         | 25.1                                  |
| 2009        | 49,656,756        | 15,412                         | 29.5                                  |
| 2010        | 49,879,812        | 15,566                         | 29.1                                  |
| 2011        | 50,111,476        | 15,906                         | 29.1                                  |
| 2012        | 50,345,325        | 14,160                         | 25.3                                  |
| 2013        | 50,558,952        | 14,427                         | 25.3                                  |
| 2014        | 50,763,158        | 13,836                         | 24.0                                  |
| 2015        | 50,951,719        | 13,513                         | 22.8                                  |
| 2016        | 51,112,972        | 13,092                         | 21.9                                  |

\*Age-standardized rates were expressed per 100,000 people and Korean mid-year population in year 2005 was used for age-standardization. Data was obtained from Statistics Korea (Available from: <http://kosis.kr/>)

**Table 3.** Joinpoint regression analysis for suicide rate from 1993 to 2016 in Korean by age group

| Categories      | Suicide rate |        | Trend 1   |                         | Trend 2   |                          | Trend 3   |                           | Trend 4   |                          |
|-----------------|--------------|--------|-----------|-------------------------|-----------|--------------------------|-----------|---------------------------|-----------|--------------------------|
|                 | 1993         | 2016   | Years     | APC (95% CI)            | Years     | APC (95% CI)             | Years     | APC (95% CI)              | Years     | APC (95% CI)             |
| <b>Men</b>      |              |        |           |                         |           |                          |           |                           |           |                          |
| 10-19 years old | 5.35         | 5.57   | 1993-1998 | 4.8% (-5.2% to 16.0%)   | 1998-2001 | -14.7% (-48.4% to 40.9%) | 2001-2016 | 2.8% (0.5% to 5.2%)*      |           |                          |
| 20-29 years old | 14.44        | 19.91  | 1993-2006 | 0.5% (-1.6% to 2.7%)    | 2006-2010 | 12.1% (-7.3% to 35.6%)   | 2010-2016 | -5.8% (-11.7% to 0.5%)    |           |                          |
| 30-39 years old | 15.53        | 31.32  | 1993-2016 | 3.0% (2.1% to 4.0%)*    |           |                          |           |                           |           |                          |
| 40-49 years old | 18.39        | 42.34  | 1993-1998 | 15.6% (3.0% to 29.8%)*  | 1998-2016 | 1.9% (0.8% to 2.9%)*     |           |                           |           |                          |
| 50-59 years old | 23.92        | 48.32  | 1993-2004 | 8.0% (4.6% to 11.5%)*   | 2004-2016 | -0.2% (-1.9% to 1.6%)    |           |                           |           |                          |
| 60-69 years old | 26.58        | 55.74  | 1993-2005 | 10.7% (7.8% to 13.7%)*  | 2005-2016 | -3.6% (-5.5% to -1.7%)*  |           |                           |           |                          |
| 70-79 years old | 34.38        | 90.32  | 1993-2004 | 12.9% (9.9% to 16.0%)*  | 2004-2011 | 1.2% (-2.2% to 4.7%)     | 2011-2016 | -7.5% (-11.2% to -3.5%)*  |           |                          |
| ≥80 years old   | 41.74        | 150.52 | 1993-2000 | 9.2% (2.3% to 16.7%)*   | 2000-2003 | 29.7% (-3.3% to 74.0%)*  | 2003-2010 | 0.9% (-2.4% to 4.3%)      | 2010-2016 | -6.2% (-8.8% to -3.6%)*  |
| <b>Women</b>    |              |        |           |                         |           |                          |           |                           |           |                          |
| 10-19 years old | 3.01         | 4.15   | 1993-1998 | 14.4% (5.2% to 24.3%)*  | 1998-2001 | -21.4% (-47.0% to 16.6%) | 2001-2009 | 8.0% (2.3% to 14.0%)*     | 2009-2016 | -5.1% (-10.0% to -0.0%)* |
| 20-29 years old | 6.97         | 12.46  | 1993-1998 | 10.0% (-1.3% to 22.5%)  | 1998-2001 | -14.8% (-47.7% to 38.8%) | 2001-2008 | 19.9% (12.0% to 28.5%)*   | 2008-2016 | -9.5% (-13.3% to -5.6%)* |
| 30-39 years old | 8.07         | 17.65  | 1993-2006 | 5.0% (3.2% to 6.8%)*    | 2006-2009 | 20.8% (-4.4% to 52.5%)   | 2009-2016 | -5.9% (-8.9% to -2.8%)*   |           |                          |
| 40-49 years old | 7.57         | 16.47  | 1993-2010 | 6.5% (5.4% to 7.7%)*    | 2010-2016 | -3.3% (-6.8% to 0.3%)    |           |                           |           |                          |
| 50-59 years old | 5.47         | 16.35  | 1993-2010 | 6.6% (5.0% to 8.2%)*    | 2010-2016 | -5.5% (-8.6% to 0.0%)    |           |                           |           |                          |
| 60-69 years old | 9.10         | 14.65  | 1993-2005 | 9.4% (7.5% to 11.4%)*   | 2005-2010 | 0.7% (-5.4% to 7.3%)     | 2010-2016 | -8.7% (-11.9% to -5.5%)*  |           |                          |
| 70-79 years old | 12.19        | 26.50  | 1993-2004 | 13.5% (11.0% to 16.1%)* | 2004-2011 | -1.5% (-4.6% to 1.7%)    | 2011-2016 | -9.9% (-13.9% to -5.8%)*  |           |                          |
| ≥80 years old   | 17.21        | 45.73  | 1993-2004 | 18.0% (14.3% to 21.8%)* | 2004-2011 | -1.3% (-5.1% to 2.5%)    | 2011-2016 | -11.5% (-15.8% to -6.9%)* |           |                          |

1  
2  
3  
4  
5  
6  
7  
8  
9  
10  
11  
12  
13  
14  
15  
16  
17  
18  
19  
20  
21  
22  
23  
24  
25  
26  
27  
28  
29  
30  
31  
32  
33  
34  
35  
36  
37  
38  
39  
40  
41  
42  
43  
44  
45  
46  
47

Joinpoint regression model is used to test that age-standardized rates have significantly changed. The trends in suicide mortality rates were summarized as APC (annual percentage change). Age-standardized rates were expressed per 100,000 men and Korean mid-year population in year 2005 was used for age-standardization. APC: annual percentage change, CI: confidence interval.  
\**p*-value <0.05

For peer review only

1  
2  
3  
4  
5 **Figure legends**  
6

7  
8 **Figure 1.** Trends in age-standardized suicide rates in South Korea, 1993-2016  
9

10 Footnotes:

11 APC=Annual percent change

12  
13 The age-standardized suicide rates are presented as suicide death cases per 100,000 people using Korean mid-year population in 2005 as  
14 standard population.  
15

16 Joinpoint regression analysis was used to determine whether there were significant changes in trends in age-standardized suicide rates for the  
17 period between 1993 and 2016.  
18

19 \*p<0.05  
20  
21  
22  
23

24 **Figure 2.** Implementation of National Suicide Prevention Program and Plan  
25

26 Footnotes:

27  
28 The age-standardized suicide rates are presented as connected line from 1993 to 2016.  
29

30 Each number represents the year in which the major events related to national suicide prevention program or plan were occurred.  
31  
32  
33  
34  
35  
36  
37  
38  
39  
40  
41  
42  
43  
44  
45  
46  
47



1  
2  
3  
4  
5  
6  
7  
8  
9  
10  
11  
12  
13  
14  
15  
16  
17  
18  
19  
20  
21  
22  
23  
24  
25  
26  
27  
28  
29  
30  
31  
32  
33  
34  
35  
36  
37  
38  
39  
40  
41  
42  
43  
44  
45  
46  
47  
48  
49  
50  
51  
52  
53  
54  
55  
56  
57  
58  
59  
60



Figure 1. Trends in age-standardized suicide rates in South Korea, 1993-2016

141x90mm (300 x 300 DPI)

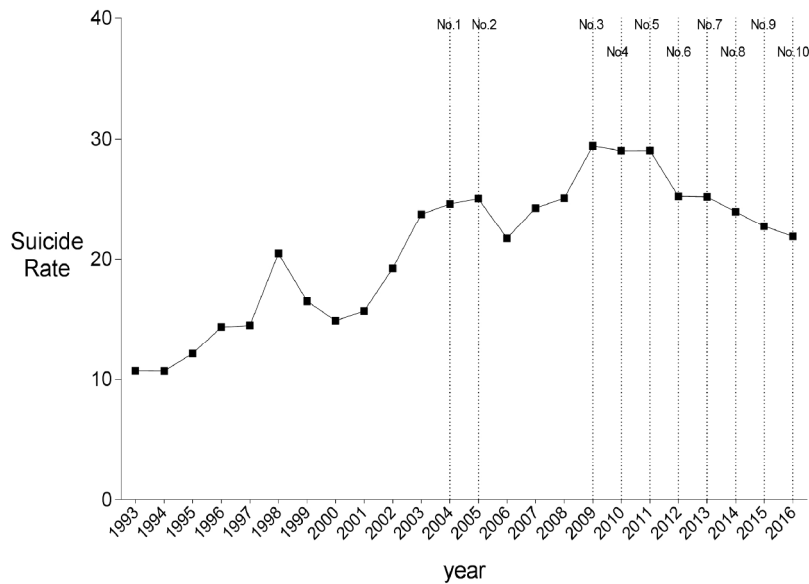

| No. | Year | National suicide prevention program or plan                                                                |
|-----|------|------------------------------------------------------------------------------------------------------------|
| 1   | 2004 | The establishment of the first 5-year National Strategy for Suicide Prevention                             |
| 2   | 2005 | Suicide prevention program was introduced into regional mental welfare centers                             |
| 3   | 2009 | The establishment of the second 5-year National Strategy for Suicide Prevention                            |
| 4   | 2010 | The establishment of integrated welfare system                                                             |
|     |      | The expansion of the basic living subsidies                                                                |
|     |      | The increase in the number of welfare officers                                                             |
| 5   | 2011 | The enactment of the Act on Preventing Suicide                                                             |
|     |      | The inhibition of sales of paraquat pesticides                                                             |
| 6   | 2012 | The enforcement of the Act on Preventing Suicide                                                           |
|     |      | The introduction of the Korean gatekeeper program for suicide prevention entitled "Watch, Listen and Talk" |
| 7   | 2013 | The introduction of management of emergency department based suicide attempts                              |
|     |      | The certification of private suicide prevention                                                            |
| 8   | 2014 | The collaboration the government with religious organizations                                              |
|     |      | The establishment of the Korea Psychological Autopsy Center                                                |
| 9   | 2015 | The expansion of screen door on the subway                                                                 |
|     |      | "Are you okay" campaign                                                                                    |
| 10  | 2016 | The establishment of the comprehensive national mental health care strategy                                |
|     |      | "Air kiss" campaign                                                                                        |

Figure 2. Implementation of National Suicide Prevention Program and Plan

190x275mm (300 x 300 DPI)

STROBE Statement—Checklist of items that should be included in reports of *cohort studies*

|                           | Item No | Recommendation                                                                                                                                                                                                                                                                                                         | Page No                                                             |
|---------------------------|---------|------------------------------------------------------------------------------------------------------------------------------------------------------------------------------------------------------------------------------------------------------------------------------------------------------------------------|---------------------------------------------------------------------|
| <b>Title and abstract</b> | 1       | (a) Indicate the study's design with a commonly used term in the title or the abstract<br>(b) Provide in the abstract an informative and balanced summary of what was done and what was found                                                                                                                          | p.1,2<br>p.2-4                                                      |
| <b>Introduction</b>       |         |                                                                                                                                                                                                                                                                                                                        |                                                                     |
| Background/rationale      | 2       | Explain the scientific background and rationale for the investigation being reported                                                                                                                                                                                                                                   | p.5                                                                 |
| Objectives                | 3       | State specific objectives, including any prespecified hypotheses                                                                                                                                                                                                                                                       | p.5<br>line 18-21                                                   |
| <b>Methods</b>            |         |                                                                                                                                                                                                                                                                                                                        |                                                                     |
| Study design              | 4       | Present key elements of study design early in the paper                                                                                                                                                                                                                                                                | p.1,2,7                                                             |
| Setting                   | 5       | Describe the setting, locations, and relevant dates, including periods of recruitment, exposure, follow-up, and data collection                                                                                                                                                                                        | p.6<br>Line 1-10                                                    |
| Participants              | 6       | (a) Give the eligibility criteria, and the sources and methods of selection of participants. Describe methods of follow-up<br>(b) For matched studies, give matching criteria and number of exposed and unexposed                                                                                                      | p.6<br>Line 1-10<br>-                                               |
| Variables                 | 7       | Clearly define all outcomes, exposures, predictors, potential confounders, and effect modifiers. Give diagnostic criteria, if applicable                                                                                                                                                                               | p.6<br>Line 9-10, 17-24                                             |
| Data sources/measurement  | 8*      | For each variable of interest, give sources of data and details of methods of assessment (measurement). Describe comparability of assessment methods if there is more than one group                                                                                                                                   | p.6<br>Line 17-24                                                   |
| Bias                      | 9       | Describe any efforts to address potential sources of bias                                                                                                                                                                                                                                                              | p.16<br>Line 10-21                                                  |
| Study size                | 10      | Explain how the study size was arrived at                                                                                                                                                                                                                                                                              | p.8<br>Line 10-15                                                   |
| Quantitative variables    | 11      | Explain how quantitative variables were handled in the analyses. If applicable, describe which groupings were chosen and why                                                                                                                                                                                           | p.7<br>Line 9-12                                                    |
| Statistical methods       | 12      | (a) Describe all statistical methods, including those used to control for confounding<br>(b) Describe any methods used to examine subgroups and interactions<br>(c) Explain how missing data were addressed<br>(d) If applicable, explain how loss to follow-up was addressed<br>(e) Describe any sensitivity analyses | p.7<br>Line 8-8<br>p.8<br>Line 5<br>p.7<br>Line 9-12<br>-<br>-<br>- |
| <b>Results</b>            |         |                                                                                                                                                                                                                                                                                                                        |                                                                     |
| Participants              | 13*     | (a) Report numbers of individuals at each stage of study—eg numbers potentially eligible, examined for eligibility, confirmed eligible, included in the study, completing follow-up, and analysed<br>(b) Give reasons for non-participation at each stage                                                              | p.8<br>Line 9-14<br>-                                               |

|                          |     |                                                                                                                                                                                                                                                                                                                                                                                                                       |                                                                    |
|--------------------------|-----|-----------------------------------------------------------------------------------------------------------------------------------------------------------------------------------------------------------------------------------------------------------------------------------------------------------------------------------------------------------------------------------------------------------------------|--------------------------------------------------------------------|
|                          |     | (c) Consider use of a flow diagram                                                                                                                                                                                                                                                                                                                                                                                    | -                                                                  |
| Descriptive data         | 14* | (a) Give characteristics of study participants (eg demographic, clinical, social) and information on exposures and potential confounders<br><br>(b) Indicate number of participants with missing data for each variable of interest<br><br>(c) Summarise follow-up time (eg, average and total amount)                                                                                                                | p.8<br>Line 9-14<br><br>-<br><br>p.8<br>Line 10                    |
| Outcome data             | 15* | Report numbers of outcome events or summary measures over time                                                                                                                                                                                                                                                                                                                                                        | p.8<br>Line 10-14                                                  |
| Main results             | 16  | (a) Give unadjusted estimates and, if applicable, confounder-adjusted estimates and their precision (eg, 95% confidence interval). Make clear which confounders were adjusted for and why they were included<br><br>(b) Report category boundaries when continuous variables were categorized<br><br>(c) If relevant, consider translating estimates of relative risk into absolute risk for a meaningful time period | p.8<br>Line 22-<br>p.10 Line 23<br><br>p.7<br>Line 9-12<br>Table 2 |
| Other analyses           | 17  | Report other analyses done—eg analyses of subgroups and interactions, and sensitivity analyses                                                                                                                                                                                                                                                                                                                        | -                                                                  |
| <b>Discussion</b>        |     |                                                                                                                                                                                                                                                                                                                                                                                                                       |                                                                    |
| Key results              | 18  | Summarise key results with reference to study objectives                                                                                                                                                                                                                                                                                                                                                              | p.11 Line 23-<br>p.12 Line 5                                       |
| Limitations              | 19  | Discuss limitations of the study, taking into account sources of potential bias or imprecision. Discuss both direction and magnitude of any potential bias                                                                                                                                                                                                                                                            | p.4 Line 10-11<br>p.16<br>Line 10-21 -                             |
| Interpretation           | 20  | Give a cautious overall interpretation of results considering objectives, limitations, multiplicity of analyses, results from similar studies, and other relevant evidence                                                                                                                                                                                                                                            | p.12 Line 9-<br>p.16 Line 7                                        |
| Generalisability         | 21  | Discuss the generalisability (external validity) of the study results                                                                                                                                                                                                                                                                                                                                                 | p.12 Line 5-7<br>p.16 Line 22-<br>p.17 Line 2                      |
| <b>Other information</b> |     |                                                                                                                                                                                                                                                                                                                                                                                                                       |                                                                    |
| Funding                  | 22  | Give the source of funding and the role of the funders for the present study and, if applicable, for the original study on which the present article is based                                                                                                                                                                                                                                                         | p.17<br>Line 19-21                                                 |

\*Give information separately for exposed and unexposed groups.

**Note:** An Explanation and Elaboration article discusses each checklist item and gives methodological background and published examples of transparent reporting. The STROBE checklist is best used in conjunction with this article (freely available on the Web sites of PLoS Medicine at <http://www.plosmedicine.org/>, Annals of Internal Medicine at <http://www.annals.org/>, and Epidemiology at <http://www.epidem.com/>). Information on the STROBE Initiative is available at <http://www.strobe-statement.org>.

# BMJ Open

## Changing trends in suicide rates in South Korea from 1993 to 2016: A descriptive study

|                                 |                                                                                                                                                                                                                                                                                                                                                                                                                                                             |
|---------------------------------|-------------------------------------------------------------------------------------------------------------------------------------------------------------------------------------------------------------------------------------------------------------------------------------------------------------------------------------------------------------------------------------------------------------------------------------------------------------|
| Journal:                        | <i>BMJ Open</i>                                                                                                                                                                                                                                                                                                                                                                                                                                             |
| Manuscript ID                   | bmjopen-2018-023144.R3                                                                                                                                                                                                                                                                                                                                                                                                                                      |
| Article Type:                   | Research                                                                                                                                                                                                                                                                                                                                                                                                                                                    |
| Date Submitted by the Author:   | 30-Jul-2018                                                                                                                                                                                                                                                                                                                                                                                                                                                 |
| Complete List of Authors:       | Lee, Sang Uk; National Center for Mental Health, Mental Health Research Park, Jong-Ik; Kangwon National University School of Medicine, Department of Psychiatry<br>Lee, Soojung; Kyungnam University, Department of Nursing<br>Oh, In-Hwan; Kyung Hee University, Department of Preventive Medicine<br>Choi, Joong-Myung ; Kyung Hee University, Department of Preventive Medicine<br>Oh, Chang-Mo; Kyung Hee University, Department of Preventive Medicine |
| <b>Primary Subject Heading</b>: | Mental health                                                                                                                                                                                                                                                                                                                                                                                                                                               |
| Secondary Subject Heading:      | Epidemiology, Health policy, Public health                                                                                                                                                                                                                                                                                                                                                                                                                  |
| Keywords:                       | Suicide & self-harm < PSYCHIATRY, Mortality, Social and political issues, Prevention, Republic of Korea                                                                                                                                                                                                                                                                                                                                                     |
|                                 |                                                                                                                                                                                                                                                                                                                                                                                                                                                             |

SCHOLARONE™  
Manuscripts

Only

1  
2  
3  
4 **Changing trends in suicide rates in South Korea from 1993 to**  
5  
6  
7 **2016: A descriptive study**  
8  
9  
10

11 Running title: Trends in suicide in South Korea  
12  
13

14  
15  
16 Sang-Uk Lee<sup>1,2</sup>, Jong-Ik Park<sup>3</sup>, Soojung Lee<sup>4</sup>, In-Hwan Oh<sup>2</sup>, Joong-Myung Choi<sup>2</sup>, Chang-Mo  
17  
18 Oh<sup>2\*</sup>  
19  
20

21  
22  
23 <sup>1</sup>Department of Mental Health Research, National Center for Mental Health, Seoul, Republic  
24  
25 of Korea

26  
27 <sup>2</sup>Department of Preventive Medicine, School of Medicine, Kyung Hee University, Seoul,  
28  
29 Republic of Korea

30  
31 <sup>3</sup>Department of Psychiatry, Kangwon National University School of Medicine, Chunchon,  
32  
33 Republic of Korea

34  
35 <sup>4</sup> Department of Nursing, Kyungnam University, Changwon, Republic of Korea  
36  
37

38  
39  
40 **Corresponding author:** Chang-Mo Oh, MD, PhD

41  
42 Department of Preventive Medicine, School of Medicine, Kyung Hee University,  
43  
44 Kyungheedaero, Dongdaemun-gu, Seoul, 02447, Republic of Korea

45  
46 Tel: +82-2-961-2265 Fax: +82-969-0792

47  
48 E-mail: kachas@naver.com  
49  
50

51  
52  
53 **Word count:** 4,054  
54

## Abstract

**Objectives:** South Korean government has recently implemented policies to prevent suicide. However, there were few studies examining the recent changing trend in suicide rates. This study aims to examine the changing trend in suicide rates by time and age group.

**Design:** A descriptive study using nationwide mortality rates

**Setting:** Data on the nationwide cause of death from 1993 to 2016 were obtained from the Statistics Korea.

**Participants:** People living in the South Korea

**Interventions:** Implementation of national suicide prevention policies (1<sup>st</sup>: 2004 year, 2<sup>nd</sup>: 2009 year)

**Primary outcome measures:** Suicide was defined as “X60-X84” code according to the ICD-10 code. Age-standardized suicide rates were estimated, and a Joinpoint regression model was applied to describe the trends in suicide rate.

**Results:** From 2010 to 2016, the suicide rates in South Korea have been decreasing by 5.5% (95% CI: -10.3% to -0.5%) annually. In terms of sex, the suicide rate for men had increased by 5.0% (95% CI: 3.6% to 6.4%) annually from 1993 to 2010. However, there has been no statistically significant change from 2010 to 2016. For women, the suicide rate had increased by 7.5% (95% CI: 6.3% to 8.7%) annually from 1993 to 2009, but since 2009, the suicide rate has been significantly decreasing by 6.1% (95% CI: -9.1% to -3.0%) annually until 2016. In terms of the age group, the suicide rates among women of almost all age groups have been decreasing since 2010; however, the suicide rates of men aged between 30 and 49 years showed continuously increasing trends.

**Conclusion:** Our results showed that there were differences in the changing trends in suicide rate by sex and age groups. Our finding suggests that there was a possible relationship

1  
2  
3  
4  
5  
6  
7  
8  
9  
10  
11  
12  
13  
14  
15  
16  
17  
18  
19  
20  
21  
22  
23  
24  
25  
26  
27  
28  
29  
30  
31  
32  
33  
34  
35  
36  
37  
38  
39  
40  
41  
42  
43  
44  
45  
46  
47  
48  
49  
50  
51  
52  
53  
54  
55  
56  
57  
58  
59  
60

between implementation of second national suicide prevention policies and a decline in suicide rate.

**Keywords:** Suicide; Mortality; Social and political issues; Prevention; Republic of Korea

For peer review only



## Article Summary

### Strengths and limitations of this study

- Our findings show that efforts to reduce suicide at the national level may lead to a decline in suicide rates especially among elderly people through natural experiment.
- Another finding of our study is that suicide rates in men in their 30s and 40s are continuing to increase, suggesting that a different suicide prevention strategy may be necessary in South Korea.
- Because this study is a descriptive epidemiologic study, it is difficult to know exactly which policies have reduced suicide rates in which age group.
- Improved accuracy of statistics on the causes of death may affect to changes in suicide rates.

## Introduction

Suicide is a major public health issue, with an estimated 788,000 deaths every year according to the World Health Organization (WHO) statistics.<sup>1</sup> The WHO established the Mental Health Action 2013-2020 plan to implement a national, multi-sectorial promotion and prevention program for promoting mental health and reducing suicide rates of each country by 10% until 2020.<sup>2</sup> Especially, the developed countries in East Asia have relatively high mortality rates due to suicide.<sup>3</sup> Among these countries, suicide in South Korea is a serious health problem because the suicide rate in South Korea in 2013 (28.5 per 100,000 person-years) was 2.4 times higher than the average suicide rates of other Organization for Economic Co-operation and Development (OECD) countries and South Korea has been ranked top among the OECD countries in terms of suicide rates in the last 10 years.<sup>4</sup> In addition, suicide was the most common cause of death in young people aged between 10 and 39 years, and it was the second-most common cause of death among adults aged 40-59 years in 2016 in South Korea.<sup>5</sup>

South Korea implemented the national suicide prevention program in the early 2000s.<sup>6</sup> This national suicide prevention program includes both high-risk group-oriented monitoring and prevention of suicide and suicide prevention program for general population such as media campaign.<sup>7</sup> However, there was a few studies to examine the trends in suicide rates by sex and age group with regard to the national suicide prevention policies in South Korea. Therefore, this study aimed to describe the changing trends in suicide rate by sex and age group in South Korea and exploring the potential effects of implementation of the national suicide prevention policies.

## Method

### *Study participants*

The cause of death statistics is a reliable source of data on how the causes of death have changed because of socioeconomic changes and public health developments; it also provides comprehensive information to plan and prioritize health care policies. The number of deaths due to suicide and the corresponding mid-year population counts from 1993 to 2016 were obtained from Statistic Korea (Available from <http://kosis.kr/>). The Statistic Korea used the estimated population as the denominator for mortality rates before year 1993. After 1993, Statistic Korea used the mid-year population based on resident registration number as the denominator for mortality rates. In addition, the cause of death data before 1993 is less accurate, therefore, we selected the suicide rates from 1993 to 2016. The code assigned to the cause of death due to suicide was “X60-X84” according to the ICD-10 code.

### *Patient and Public Involvement*

We did not contact with patients and our study was not directly associated with patients, because we used the administrative secondary data – the cause of death data from Statistic Korea. There was no role or participation of patients in our study.

### *National suicide prevention program*

Information regarding the timing and implementation of the national suicide prevention policy in South Korea were obtained from relevant government data and expert consultants. Initially, the timing and details of the national suicide prevention policy were obtained from the national knowledge information system (<https://nkis.re.kr:4445/main.do>) and publications from Korea Suicide Prevention Center.<sup>7-10</sup> The contents and details obtained from these

1  
2  
3  
4 websites were confirmed after review by the experts and staffs of Korea Suicide Prevention  
5 Center.<sup>6-12</sup>  
6  
7  
8  
9

### 10 ***Ethics statement***

11  
12 The study protocol was reviewed by the Institutional Review Board of Kyung Hee  
13 University (IRB No.KHSIRB-17-086). Our study was exempted from review because it was  
14 not an experimental trial, which required contacting the patients, and our study did not  
15 include personal identifiable information.  
16  
17  
18  
19  
20  
21  
22

### 23 ***Statistical analysis***

24  
25 To describe the baseline characteristics of people who die due to suicide, the number of  
26 deaths was presented for each 6-year period (1993-1998/1999-2004/2005-2010/2011-2016)  
27 from 1993 to 2016. Chi-square test was used to test the differences in the distribution of death  
28 due to suicide by sex and age groups. To describe the changes in suicide rates by time period,  
29 the age-standardized suicide rates of suicide were calculated. The mid-year Korean  
30 population in 2005 was used as the standard population for age-standardized suicide rates.  
31 Age-specific suicide rates were applied to the corresponding 5-year age group of the standard  
32 population. The sum of expected deaths for each 5-year age group was calculated, and the  
33 age-standardized suicide rates were calculated by dividing the sum of expected deaths by the  
34 total number of standard population. We used Joinpoint regression program to know whether  
35 there were changes in trends in mortality rates. Joinpoint statistical software was developed  
36 by the National Cancer Institute in the United States. Joinpoint regression modelling was  
37 used to test the trends in age-standardized suicide rates for suicide and detect significant  
38 changes over time to fit a better multi-segmented model compared to a simple linear model  
39  
40  
41  
42  
43  
44  
45  
46  
47  
48  
49  
50  
51  
52  
53  
54

1  
2  
3  
4 using a Monte Carlo permutation method.<sup>13</sup> Further, it could detect point where significant  
5  
6 change in rates over time. The trends in rates were summarized as annual percentage changes  
7  
8 (APCs) and their 95% confidence intervals (CIs).  
9

10 *P* values <0.05 were considered statistically significant. We used SPSS (version 23.0,  
11 Armonk, NY: IBM Corp., USA) and R software (version 3.1.1, Vienna, Austria) and  
12 Joinpoint Regression Program software (Version 4.1.1, Statistical Methodology and  
13 Applications Branch, Surveillance Research Program, National Cancer Institute, Bethesda,  
14 MD, USA).  
15  
16  
17  
18  
19  
20  
21  
22  
23  
24  
25

## 26 **Results**

### 27 *Baseline characteristics*

28  
29  
30 The total number of deaths in South Korea from 1993 to 2016 was 6,007,678 (Table 1). Of  
31 these, the total number of deaths due to suicide was 249,085 (4.2%). Of the deaths due to  
32 suicide, 169,963 (68.2%) were men, and 79,122 (31.8%) were women. In terms of the time  
33 period, South Korea had the highest number of deaths from suicide (n=15,906) in 2011 and  
34 the highest age-standardized suicide rate from suicide (29.5 per 100,000 person-year) in 2009  
35 (Table 2). After 2011, the number of deaths and age-standardized suicide rates due to suicide  
36 decreased until 2016. The number of deaths due to suicide in 2011-2016 was 2.5 times higher  
37 than that in 1993-1998. According to the age groups, the proportion of deaths due to suicide  
38 in children and adolescents aged between 10 and 19 years had decreased from 1993-1998 to  
39 2011-2016, whereas the proportion of elderly aged more than 70 years had increased during  
40 the same time period (p<0.0001).  
41  
42  
43  
44  
45  
46  
47  
48  
49  
50  
51  
52  
53

### ***Trends in suicide rates***

According to the joinpoint regression model, the mortality rate from suicide had increased by 5.6% (95% CI: 4.4% to 6.9%) annually from 1993 to 2010 (Figure 1). After 2010, the suicide rate had declined by 5.5% (95% CI: -10.3% to -0.5%) annually until 2016. In terms of sex, suicide rate for men had increased by 5.0% (95% CI: 3.6% to 6.4%) annually from 1993 to 2010. After 2010, suicide rate for men shown decreasing trends (APC=-4.3%, 95% CI: -9.8% to 1.6%), although it was not statistically significant ( $p=0.14$ ). Similarly, the suicide rates for women had increased by 7.5% (95% CI: 6.3% to 8.7%) annually from 1993 to 2009. Following that, suicide rates for women showed a significant decreasing trend (APC=-6.1%, (95% CI: -9.1% to -3.0%)).

### ***Trends in suicide rates for men by age group***

Joinpoint regression analysis was performed by sex and age group. Suicide rates for men increased with age (Table 3). The suicide rate of adolescents aged 10-19 years is relatively low, ranging from 3 to 7 people per 100,000 persons. The suicide rate of adolescents aged 10-19 years has been increasing annually by 2.8% since 2001. Although there was no statistically significant change in suicide rate of young adults aged 20-29 years, the rates showed increasing trends from 2006 to 2010, and it has tended to decrease since 2010. The suicide rate of men aged 30-39 years showed a significant annual increase of 3.1% from 1993 to 2016. For men aged 40-49 years, the suicide rate dramatically increased by 15.6% annually from 1993 to 1998. Since 1998, the increasing trend in the suicide rate has attenuated among men aged 40-49 years (APC=1.9% (95% CI: 0.9% to 2.9%)). The suicide rate for men aged 50-59 years has increased by 8.0% from 1993 to 2004. However, there has been no

1  
2  
3  
4 significant increase since 2004. For men aged 60-69 years, there was a statistically significant  
5 increase in suicide rate by 10.7% increase each year between 1993 and 2005; however, there  
6 has been a decreasing trend since 2005. The suicide rate for men aged 70-79 years had  
7 increased by 12.9% annually from 1993 to 2004 but has been decreasing by 7.5% annually  
8 since 2011. For men aged 80 years and above, the suicide rate had increased by 9.2%  
9 annually between 1993 and 2000. There was no significant change in the suicide rate for men  
10 from 2000 to 2010. Since 2010, the suicide rate has been decreasing by 6.2% annually.  
11  
12  
13  
14  
15  
16  
17  
18  
19  
20

### 21 ***Trends in suicide rates for women by age group***

22  
23 Table 3 shows the suicide rate for women by age group. The suicide rate of adolescents  
24 aged 10-19 years is relatively low, and the trends of suicide rates are similar to that in the  
25 twenties. Suicide rates in women aged 20-29 years had increased by 19.9% annually from  
26 2001 to 2008. Since 2008, suicide rate for women aged 20-29 years has decreased by 9.5%  
27 annually. The suicide rate of women aged 30-39 years showed a significant annual increase of  
28 5.0% from 1993 to 2006, whereas the suicide rates tended to decrease by 5.9% annually from  
29 2009 to 2016. For women aged 40-49 years, the suicide rate had increased by 6.5% annually  
30 from 1993 to 2010. Since 2010, there was no significant change in the suicide rate. The  
31 suicide rate for women aged 50-59 years had increased by 6.6% from 1993 to 2010. After  
32 2010, the suicide rates for women aged 50-59 years showed a decreasing trend (APC=-5.5%  
33 (95% CI: -8.6% to 0.0%)). For women aged 60-69 years, there was a statistically significant  
34 increase in the suicide rate with 9.4% increase each year from 1993 to 2005; however, there  
35 has been a significant decreasing trend since 2010 (APC=-8.7% (95% CI: -11.9% to -5.5%)).  
36 The suicide rate for women aged 70-79 years increased by 13.5% annually from 1993 to 2004  
37 but has decreased significantly by 9.9% annually since 2011. For women aged 80 years and  
38  
39  
40  
41  
42  
43  
44  
45  
46  
47  
48  
49  
50  
51  
52  
53  
54

1  
2  
3  
4 above, the suicide rates had dramatically increased by 18.0% annually from 1993 to 2004.  
5  
6 There was no significant change from 2004 to 2011. Since 2011, suicide rate has decreased  
7  
8 by 11.5% annually.  
9

### 12 ***The implementation of the National Suicide Prevention Program in South Korea***

14 The first step of the national suicide prevention program was the establishment of the first  
15 5-year National Strategy for Suicide Prevention in 2004 (Figure 2). Based on this, a suicide  
16 prevention program was introduced in 2005 at regional mental health centres which were  
17 public community infrastructures for mental health. Following this, the second 5-year  
18 National Strategy for Suicide Prevention was implemented in 2009. Based on this program, a  
19 separate budget was newly proposed and executed. In 2010, a screen door was expanded to  
20 prevent suicide on the subway. In 2011, the Act for the Prevention of Suicide was passed, the  
21 Korea Suicide Prevention Center was established, and the sales of paraquat pesticides were  
22 prohibited. The Act for the Prevention of Suicide was enforced in 2012, and the Korean  
23 gatekeeper training program for suicide prevention entitled '*Watch, Listen and Talk*' was  
24 introduced to the general population in South Korea. In 2013, an emergency department-  
25 based suicide attempt survivor management program was implemented, and the Korea  
26 Suicide Prevention Center along with Journalists Association of Korea announced the  
27 recommendation for media reporting of suicide. In addition, the government authenticated the  
28 private suicide prevention program to disseminate the evidence-based suicide prevention  
29 program. In 2014, the government collaborated with religious organizations to increase the  
30 participation rates of general population in the national suicide program. The Korea  
31 Psychological Autopsy Center was established to understand the causes of suicide deaths  
32 better.  
33  
34  
35  
36  
37  
38  
39  
40  
41  
42  
43  
44  
45  
46  
47  
48  
49  
50  
51  
52  
53  
54



## Discussion

This study aimed to examine the trends of suicide rate in South Korea by sex and age group and explore these suicide rate changes according to the timing of suicide prevention policies implemented by the Korean government. This study found that the overall suicide rate in South Korea had tended to decline since 2010. However, when analysed by sex and age, the suicide rate trends showed differences according to the sex and age groups. While women's suicide rate has decreased in all age groups since 2010, the suicide rate of men aged between 30 and 49 years is still on the rise. Our findings were consistent with the study findings of Matsubayashi et al.<sup>14</sup> They showed that a national level of suicide prevention intervention was an effective way to reduce suicide rate except for working-age adults in 21 OECD countries.<sup>14</sup>

### *Trend in suicide rate between 1993 and 2004/2005*

From 1993 to 2016, the suicide rates tended to change at two points in time. The suicide rates of South Korea have increased continuously from 1993 to 2010. According to the study of Kwon et al, the recent increase in suicide during 1986-2005 was mainly attributed to increase in suicide in elderly people.<sup>15</sup> The rapid social change such as the increasing tendency of smaller family size may make the elderly feel isolated. In addition, insufficient social security system and economical problem may lead to an increase in suicide rates in the elderly.<sup>15</sup> However, suicide rate of young people aged less than 45 years old have also increased significantly.<sup>15</sup> The rising economic inequality and increasing unemployment rate due to economic crisis in 1997 of Korea may contribute to the increase in suicide rate among

1  
2  
3  
4 young people. In addition, the fragmentation of social integration may have weakened the  
5  
6 social ability to overcome mental problem such as depression.<sup>15</sup>  
7  
8  
9

### 10 11 ***Trend in suicide rate after 2004/2005*** 12

13 However, our study found that the suicide rate changed before and after 2004 and 2005. It  
14  
15 was revealed that after 2004, an increase in the suicide rate of men and women aged 60 years  
16  
17 or older had changed. After 2005, the suicide rate of men in their 60s decreased by 3.6% each  
18  
19 year and that of women in their 60s, which had risen sharply up until 2005, no longer showed  
20  
21 a statistically significant increase from 2005 to 2010.  
22  
23

24 During this period, Korea's 1<sup>st</sup> national suicide prevention initiative was implemented in  
25  
26 2004, which included various programs such as mental health improvement and suicide  
27  
28 prevention, suicide prevention counseling calls, the development of a culture that respects life,  
29  
30 treatment and post-suicide attempt management for those who attempt suicide, and suicide  
31  
32 prevention research.<sup>12</sup> In addition, the Mental Health Welfare Center, a national mental health  
33  
34 system, also implemented a regional suicide prevention program in 2005, and the Seoul  
35  
36 Suicide Prevention Center was first established.<sup>16</sup> Although the 1<sup>st</sup> suicide prevention  
37  
38 initiative was implemented in 2004, the government did not earmark funding for the 1<sup>st</sup>  
39  
40 suicide prevention initiative.<sup>17</sup> In other words, this project had just added suicide prevention  
41  
42 program to the existing mental health care service without sufficient additional budgets and  
43  
44 manpower. In addition, the scope of this policy was mainly focused on the individuals with  
45  
46 mental disorder, and there was not sufficient consideration for social and environmental  
47  
48 changes. For this reason, it is difficult to find the data that can precisely identify the programs  
49  
50 that were actually implemented among various other programs. Nonetheless, a suicide  
51  
52  
53  
54

1  
2  
3  
4 prevention program implemented by the Mental Health Welfare Center mainly focused on  
5 management via phone calls, and it has been applied since 2005 without additional funding.  
6  
7  
8 Previous studies reported that interventions and management based on phone calls were  
9  
10 effective for the suicide prevention of the elderly,<sup>18,19</sup> and in this regard, changes in the  
11  
12 suicide rate mostly found among those aged 60 years or older can be attributed to the effect  
13  
14 of phone-based interventions.<sup>20</sup> These changes in the suicide rate, however, were found to be  
15  
16 not a statistically significant decline in the suicide rate overall but a change in the increasing  
17  
18 trend of the suicide rate.  
19  
20  
21  
22

### 23 ***Trend in suicide rate among middle aged people between 2004/2005 and 2010***

24  
25 On the other hands, suicide rates have continuously increased from 2004/2005 to 2010  
26  
27 among men aged 30-49 years old and women aged 40-59 years old. Although we could not  
28  
29 explain the exact cause of increase in suicide rates among middle aged men and women, high  
30  
31 economic burden and unemployment rates after the International Monetary Fund (IMF) may  
32  
33 have contributed to increase in suicide rates. In the United States, suicide rates among  
34  
35 individuals aged 40-64 years old have increased from 2005 to 2010, and the external  
36  
37 circumstances such as job, financial, and legal problems were closely associated with  
38  
39 increased suicide among these middle aged people.<sup>21</sup> In the England, more suicides were  
40  
41 observed both in men and women than expected due to the economic regression between  
42  
43 2008 and 2010. A study of Ben Barr et al. found that about 40% of increased suicide among  
44  
45 men were attributed to elevated unemployment during this period.<sup>22</sup> According to the 2008  
46  
47 National Survey of the National statistics office, the most common causes for suicidal  
48  
49 ideation was economic difficulties (36.2%), followed by family trouble (15.6%) and  
50  
51 loneliness (14.4%) in South Korea.<sup>23</sup> Especially, the proportion of suicidal ideation due to  
52  
53  
54  
55

1  
2  
3  
4 economic difficulties was the highest among people aged 40-59 years old.<sup>23</sup>  
5

6 Other factors, such as changes in alcohol consumption and suicide by famous celebrities,  
7  
8 may have affected suicide rates among middle-aged people. Indeed, age-standardized alcohol  
9  
10 abuse disorder rates have increased from 32.7% in 2005 to 38.8% in 2009.<sup>24</sup> In addition, Fu et  
11  
12 al. analysed the impact of suicide of Korean famous celebrities on the overall suicides rate  
13  
14 from 2005 to 2008. After adjusting for seasonal effects, changing trends, and unemployment,  
15  
16 significant increase of suicide cases was followed by the suicide of Korean famous  
17  
18 celebrities.<sup>25</sup>  
19  
20  
21  
22

### 23 ***Trend in suicide rate after 2008/2009***

24  
25 Second, the suicide rate began to decline from 2008 to 2011. As of 2008 and 2009, the  
26  
27 suicide rate for females aged 10 to 39 years, which had increased before, began to decrease.  
28  
29 As of 2010 and 2011, the suicide rate of women aged 40 years or older also began to decline.  
30  
31 Furthermore, the suicide rates of men in their 20s and those aged 70 years or older tended to  
32  
33 decline since 2010 and 2011, respectively. In contrast, the suicide rate of men aged 30-49  
34  
35 years had not decreased significantly from 1993 to 2016; instead, it continued to rise during  
36  
37 this period.  
38  
39

40 To begin with, the 2<sup>nd</sup> national suicide prevention initiative was enacted in 2009, which  
41  
42 consisted of the research and development of suicide prevention policy, development of a  
43  
44 culture that respects life, suicide prevention training and nurturing of specialists, online  
45  
46 counselling and harmful suicide information monitoring, and public-private partnerships for  
47  
48 suicide prevention.<sup>12</sup> The importance of the 2<sup>nd</sup> suicide prevention initiative is that the  
49  
50 national budget was allocated for suicide prevention unlike the 1<sup>st</sup> suicide prevention  
51  
52 initiative. While this initiative could be effective in reducing the suicide rate of young  
53  
54

1  
2  
3  
4 females in their 10s to 30s, it would be more reasonable to consider that a series of specific  
5  
6 events contributed to a surge in the suicide rate of young women in 2008 and 2009. The  
7  
8 effect of a celebrity's suicide on the suicide rate is well-known,<sup>26,27</sup> and there were incidents  
9  
10 of suicides among very high-profile celebrities in 2008 and 2009 in South Korea, which were  
11  
12 reported across the country.<sup>7</sup> Furthermore, it was reported that the effect of a celebrity's  
13  
14 suicide in Korea was five times higher among young women.<sup>28</sup> Considering these results, it is  
15  
16 a reasonable interpretation to view a reduction in the suicide rate of young women after 2009  
17  
18 as a decline in the suicide rate surged previously due to the effect of a series of specific  
19  
20 events—celebrity suicides.  
21  
22

23 Some important national suicide prevention activities were carried out during the 2<sup>nd</sup>  
24  
25 suicide prevention initiative, such as the installation of more screen doors to prevent people  
26  
27 from throwing themselves into the subway train<sup>29</sup> and a ban on the sale of paraquat  
28  
29 pesticides.<sup>30</sup> One of the most effective suicide prevention intervention is to restrict of  
30  
31 assessment to lethal methods.<sup>31</sup> Such government-led suicide prevention interventions may  
32  
33 have contributed to the changes in the suicide rate of men in their 20s, men aged 70 years or  
34  
35 older, and women aged 40 years or older in 2010 and 2011. Moreover, a continuous decrease  
36  
37 in the suicide rate since 2011 indicates that the reduction of suicide rates was attributable to  
38  
39 the government intervention efforts. After the introduction of the national suicide prevention  
40  
41 initiative in 2009, the community mental health center has endeavoured to register and  
42  
43 manage more people with severe mental disorder and people with alcoholism. Indeed, the  
44  
45 mental health service utilization rates among people with alcoholism has increased from 8.1%  
46  
47 in 2008 to 12.1% in 2015.<sup>32</sup> The registration and management rate for patients with severe  
48  
49 mental disorder in the community mental health center has also increased from 19.2% in  
50  
51 2008 to 26.4% in 2016. In addition, the government implemented an emergency department-

1  
2  
3  
4 based suicide attempt survivor management program, announced the recommendation for  
5  
6 media reporting of suicide in 2013.<sup>7</sup> Indeed, the proportion of alcohol abuse and suicidal  
7  
8 thoughts of those participated in emergency department-based suicide attempt survivor  
9  
10 management program has decreased by 2.9%p and 6.8%p between the first and fourth contact,  
11  
12 respectively.<sup>33</sup>  
13  
14  
15

### 16 17 ***Increase in suicide rate of men in their 30s and 40s***

18  
19 Nevertheless, it was found that the suicide rate of men in their 30s and 40s had continued  
20  
21 to increase significantly from 1993 to 2016. While there was a slight slowdown in the  
22  
23 increase of their suicide rate due to suicide prevention programs implemented by the  
24  
25 government, it did not result in a decrease in the suicide rate. This might suggest that the  
26  
27 currently implemented suicide prevention programs are not effective for men in their 30s and  
28  
29 40s. However, in Korea, suicide prevention policies focused on men in their 30s and 40s have  
30  
31 not been implemented until now. In previous studies, men were reported to have a higher risk  
32  
33 of suicide due to financial reasons than women do,<sup>34</sup> and the risk of suicide among men  
34  
35 arising due to the unemployment rate and economic crisis was also shown to be higher.<sup>35,36</sup>  
36  
37 However, the current suicide prevention policies only included the development of an office  
38  
39 worker gatekeeper program for men in their 30s and 40s.  
40  
41  
42  
43  
44

### 45 ***Strengths and Limitations of this study***

46  
47 When interpreting the findings of this study, the following limitations need to be  
48  
49 considered. This study did not take account of the individual effect of a suicide prevention  
50  
51 program; it instead interpreted the changes in suicide rates at each point in time when such  
52  
53 programs were implemented. However, we cannot confirm when exactly the effect of policy  
54  
55

1  
2  
3  
4 was seen. This was because the data on the outcome of each individual suicide prevention  
5  
6 program were not available as Korea did not have a monitoring system for each individual  
7  
8 program, even though it implemented suicide prevention programs quite extensively. In this  
9  
10 regard, a monitoring system needs to be established in order to identify the policy effect on  
11  
12 the changes in the suicide rate in Korea more accurately, and a follow-up study needs to be  
13  
14 conducted using this system. Furthermore, the accuracy of the cause of death statistics had  
15  
16 continued to improve, so there is a chance that an increase in the number of deaths due to  
17  
18 suicide would have been affected by the improved accuracy of statistics on the causes of  
19  
20 death. Despite these limitations, this study has the following strengths. This study presented  
21  
22 the trends in the suicide rates in Korea based on statistical analysis of a 24-year period. In  
23  
24 addition, it showed that the point in time wherein such changes in the suicide rate occurred  
25  
26 coincided with that wherein the government-led suicide prevention programs were  
27  
28 implemented. Accordingly, further government-level investments and interventions should be  
29  
30 considered to reduce the suicide rate.  
31  
32  
33  
34  
35

### 36 **Conclusion**

37  
38 This study showed that the suicide rate among Korean men and women has decreased  
39  
40 since 2010, based on the causes of death statistics, which could represent the general  
41  
42 population of South Korea. Our findings also showed that there were significant changes in  
43  
44 trends of Korea's suicide rate especially among elderly people after 2010 to 2011. These  
45  
46 changes in suicide rate coincided with those when the 2<sup>nd</sup> suicide prevention initiative  
47  
48 enacted in 2009. In this regard, it is considered that government-level suicide prevention  
49  
50 interventions had a potential effect on decreasing the suicide rate among elderly people, and  
51  
52 national-level efforts are still needed in the future to reduce the increasing suicide rate of men  
53  
54

1  
2  
3  
4 in their 30s and 40s.  
5  
6  
7

### 8 **Author contributions**

9  
10 S-U Lee obtained, analysed the data and wrote the manuscript and J-I P, S Lee, I-H Oh and  
11 J-M Choi interpreted the data and contributed to revise the manuscript. C-M Oh made the  
12 research design and revised the manuscript.  
13  
14  
15

### 16 **Funding sources**

17  
18  
19 This work was supported by a grant from Kyung Hee University in 2017 (grant: KHU-  
20 20170835).  
21  
22  
23  
24  
25

### 26 **Conflicts of interests**

27  
28  
29 On behalf of all the authors, the corresponding author declares that there are no conflicts of  
30 interests.  
31  
32  
33  
34  
35

### 36 **Patient consent**

37  
38 This study was a descriptive epidemiologic study using the cause of death database that  
39 could not identify individuals. Therefore, patient consent form was exempted from IRB.  
40  
41  
42  
43  
44

### 45 **Acknowledgments**

46  
47 All authors participated in the design, execution, and analysis of the results and have read  
48 and approved the final version. We are especially thankful for the advice and help of the  
49 staffs and colleagues of the Korea Suicide Prevention Center. There was no role or  
50 participation of patients in our study.  
51  
52  
53  
54



## Ethical Standards

The study protocol was reviewed and approved by Institutional Review Board of Kyung Hee University (IRB No. KHSIRB-17-086).

## Data sharing statement

All data used in this study can be obtained from Homepage of Statistic Korea (<http://kosis.kr/eng/>).

## REFERENCES

1. World Health Organisation. Suicide Data.  
[http://www.who.int/mental\\_health/prevention/suicide](http://www.who.int/mental_health/prevention/suicide). (Accessed on 14 September 2017).
2. World Health Organisation. Mental health action plan 2013–2020.  
[http://www.who.int/mental\\_health/publications/action\\_plan/en/](http://www.who.int/mental_health/publications/action_plan/en/). (Accessed on 14 September 2017).
3. Hendin H, Phillips MR, Vijayakumar L, Pirkis J, Wang H, Yip P, Wasserman D, Bertolote JM, Fleischmann A. Suicide and suicide prevention in Asia. World Health Organization: Geneva, 2018.
4. Organization for Economic Co-operation and Development. OECD health data 2016.  
<https://data.oecd.org/healthstat/suicide-rates.htm>. (Accessed on 14 September 2017).
5. Statistics Korea. Cause-of-Death Statistics 2017. <http://kosis.kr/en>. (Accessed on 14

- 1  
2  
3  
4 September 2017).
- 5  
6 6. Paik JW, Jo SJ, Lee S, Ong JY, Park JI. The Effect of Korean Standardized Suicide  
7  
8 Prevention Program on Intervention by Gatekeepers. *J Korean Neuropsychiatr Assoc*  
9  
10 2014;53:358-363. [In Korean].
- 11  
12 7. Korea Suicide Prevention Center. *Suicide White Book*. Seoul: Ministry of Health and  
13  
14 Welfare, 2014 [In Korean].
- 15  
16 8. Korea Suicide Prevention Center. *Suicide White Book*. Seoul: Ministry of Health and  
17  
18 Welfare, 2015 [In Korean].
- 19  
20 9. Korea Suicide Prevention Center. *Suicide White Book*. Seoul: Ministry of Health and  
21  
22 Welfare, 2016 [In Korean].
- 23  
24 10. Korea Suicide Prevention Center *Suicide White Book*. Seoul: Ministry of Health and  
25  
26 Welfare, 2017 [In Korean].
- 27  
28 11. Kang HG. Social Welfare Delivery Reform: Achievements and Beyond, *Health and*  
29  
30 *Welfare Policy Forum* 2012;4:35-49
- 31  
32 12. Lee SY. Policy options for the improvement of suicide prevention programs. *Health and*  
33  
34 *Welfare Policy Forum* 2015;4:34-49.
- 35  
36 13. Kim HJ, Fay MP, Feuer EJ, Midthune DN. Permutation tests for joinpoint regression with  
37  
38 applications to cancer rates. *Stat Med* 2000;19:335-351.
- 39  
40 14. Matsubayashi T, Ueda M. The effect of national suicide prevention programs on suicide  
41  
42 rates in 21 OECD nations. *Soc Sci Med* 2011;73:1395-400.
- 43  
44 15. Kwon JW, Chun H, Cho SI. A closer look at the increase in suicide rates in South Korea  
45  
46 from 1986-2005. *BMC Public Health* 2009;9:72-80.
- 47  
48 16. National Mental Health and Welfare Commission. *Guidelines for mental health services*,  
49  
50 Seoul: Ministry of Health and Welfare 2005 [In Korean].
- 51  
52  
53  
54  
55  
56  
57  
58  
59  
60

17. Park JI, Nam YY, Lee HK, Park JY, Lee MS, Lee SJ. National suicide prevention plan. Seoul: Ministry of Health and Welfare, 2011 [In Korean].
18. De Leo D, Buono MD, Dwyer J. Suicide among the elderly: the long-term impact of a telephone support and assessment intervention in northern Italy. *Br J Psychiatry* 2002;181: 226-9.
19. De Leo D, Carollo G, Buono MD. Lower suicide rates associated with a Tele-Help/Tele-Check service for the elderly at home. *Am J Psychiatry* 1995;152: 632-4.
20. Sun HJ. Suicide prevention efforts for the elderly in Korea. *Perspect Public Health* 2016;136:269-70.
21. Hempstead KA, Phillips JA. Rising suicide among adults aged 40-64 years: the role of job and financial circumstances. *Am J Prev Med* 2015;48:491-500.
22. Barr B, Taylor-Robinson D, Scott-Samuel A, McKee M, Stuckler D. Suicides associated with the 2008-10 economic recession in England: time trend analysis. *BMJ* 2012;345:e5142.
23. Statistics Korea. Social Survey 2008. <http://kosis.kr/en>. (Accessed on 30 July 2018).
24. Park SH, Kim CH, Kim DJ, Suk KT, Park HY, Lee JG, Shin KJ, Park JH, Kim TO, Yang SY, Moon YS, Lee HY. Secular trends in prevalence of alcohol use disorder and its correlates in Korean adults: results from Korea National Health and Nutrition Examination Survey 2005 and 2009. *Subst Abus* 2012;33:327-35.
25. Fu KW, Chan CH. A study of the impact of thirteen celebrity suicides on subsequent suicide rates in South Korea from 2005 to 2009. *PLoS One* 2013;8:e53870.
26. Jeong J, Shin SD, Kim H, Hong YC, Hwang SS, Lee EJ. The effects of celebrity suicide on copycat suicide attempt: a multi-center observational study. *Soc Psychiatry Psychiatr Epidemiol* 2012;47:957-65.

- 1  
2  
3  
4 27. Niederkrotenthaler T, Fu KW, Yip PS, Fong DY, Stack S, Cheng Q, Pirkis J. Changes in  
5  
6 suicide rates following media reports on celebrity suicide: a meta-analysis. *J Epidemiol*  
7  
8 *Community Health* 2012;66:1037-42.  
9
- 10 28. Ju Ji N, Young Lee W, Seok Noh M, Yip PS. The impact of indiscriminate media  
11  
12 coverage of a celebrity suicide on a society with a high suicide rate: epidemiological  
13  
14 findings on copycat suicides from South Korea. *J Affect Disord* 2014;156:56-61.  
15
- 16 29. Chung YW, Kang SJ, Matsubayashi T, Sawada Y, Ueda M. The effectiveness of platform  
17  
18 screen doors for the prevention of subway suicides in South Korea. *J Affect Disord*.  
19  
20 2016 ;194:80-3.  
21
- 22 30. Cha ES, Chang SS, Gunnell D, Eddleston M, Khang YH, Lee WJ. Impact of paraquat  
23  
24 regulation on suicide in South Korea. *Int J Epidemiol* 2015;45:470-9.  
25
- 26 31. Zalsman G, Hawton K, Wasserman D, van Heeringen K, Arensman E, Sarchiapone M,  
27  
28 Carli V, Höschl C, Barzilay R, Balazs J, Purebl G, Kahn JP, Sáiz PA, Lipsicas CB,  
29  
30 Bobes J, Cozman D, Hegerl U, Zohar J. Suicide prevention strategies revisited: 10-year  
31  
32 systematic review. *Lancet Psychiatry* 2016;3:646-59.  
33
- 34 32. Korea Health Promotion Institute. Health Plan 2020. <http://www.khealth.or.kr/healthplan>.  
35  
36 (Accessed on 24 April 2018).  
37
- 38 33. Korea Suicide Prevention Center. 2013-2015 Emergency Department Based Post-Suicidal  
39  
40 Care Program Report Summary. <http://www.spckorea.or.kr/> (Accessed on 25 June,  
41  
42 2018)  
43
- 44 34. Lee SU, Oh IH, Jeon HJ, Roh S. Suicide rates across income levels: Retrospective cohort  
45  
46 data on 1 million participants collected between 2003 and 2013 in South Korea. *J*  
47  
48 *Epidemiol* 2017;27:258-64.  
49
- 50 35. Chang SS, Gunnell D, Sterne JA, Lu TH, Cheng AT. Was the economic crisis 1997–1998  
51  
52

1  
2  
3  
4 responsible for rising suicide rates in East/Southeast Asia? A time-trend analysis for  
5  
6 Japan, Hong Kong, South Korea, Taiwan, Singapore and Thailand. Soc Sci Med.  
7  
8 2009;68:1322-31.  
9

- 10  
11 36. Hawton K, Arensman E, Wasserman D, Hulten A, Bille-Brahe U, Bjerke T, Crepet P,  
12  
13 Deisenhammer E, Kerkhof A, De Leo D, Michel K, Ostamo A, Philippe A, Querejeta I,  
14  
15 Salander-Renberg E, Schmidtke A, Temesváry B. Relation between attempted suicide  
16  
17 and suicide rates among young people in Europe. J Epidemiol Community Health  
18  
19 1998;52:191-4  
20  
21  
22  
23  
24  
25  
26  
27  
28  
29  
30  
31  
32  
33  
34  
35  
36  
37  
38  
39  
40  
41  
42  
43  
44  
45  
46  
47  
48  
49  
50  
51  
52  
53  
54

**Table 1.** Baseline characteristics of suicide by sex and age group

| Characteristics                                    | Overall          | Year            |                 |                 |                 | <i>p</i> -value <sup>¶</sup> |
|----------------------------------------------------|------------------|-----------------|-----------------|-----------------|-----------------|------------------------------|
|                                                    |                  | 1993-1998       | 1999-2004       | 2005-2010       | 2011-2016       |                              |
| <b>Total number of deaths*</b>                     | 6,007,678        | 1,445,819       | 1,467,088       | 1,479,483       | 1,615,288       |                              |
| <b>Number of deaths due to suicide<sup>†</sup></b> | 249,085 (4.15%)  | 34,064 (2.36%)  | 51,413 (3.50%)  | 78,674 (5.32%)  | 84,934 (5.26%)  |                              |
| <b>Sex<sup>‡</sup></b>                             |                  |                 |                 |                 |                 | <0.0001                      |
| Men                                                | 169,963 (68.23%) | 23,733 (69.67%) | 35,619 (69.28%) | 51,525 (65.49%) | 59,086 (69.57%) |                              |
| Women                                              | 79,122 (31.77%)  | 10,331 (30.33%) | 15,794 (30.72%) | 27,149 (34.51%) | 25,848 (30.43%) |                              |
| <b>Age group<sup>§</sup></b>                       |                  |                 |                 |                 |                 | <0.0001                      |
| 10-19 years                                        | 7,712 (3.1%)     | 2,338 (6.9%)    | 1,629 (3.2%)    | 1,936 (2.5%)    | 1,809 (2.1%)    |                              |
| 20-29 years                                        | 29,988 (12.0%)   | 7,108 (20.9%)   | 6,306 (12.3%)   | 9,097 (11.6%)   | 7,477 (8.8%)    |                              |
| 30-39 years                                        | 43,015 (17.3%)   | 7,800 (22.9%)   | 9,654 (18.8%)   | 12,575 (16.0%)  | 12,986 (15.3%)  |                              |
| 40-49 years                                        | 47,796 (19.2%)   | 5,815 (17.1%)   | 10,468 (20.4%)  | 14,938 (19.0%)  | 16,575 (19.5%)  |                              |
| 50-59 years                                        | 41,960 (16.8%)   | 4,701 (13.8%)   | 7,705 (15.0%)   | 12,593 (16.0%)  | 16,961 (20.0%)  |                              |
| 60-69 years                                        | 33,214 (13.3%)   | 3,259 (9.6%)    | 7,441 (14.5%)   | 11,615 (14.8%)  | 10,899 (12.8%)  |                              |
| 70-79 years                                        | 29,654 (11.9%)   | 2,142 (6.3%)    | 5,389 (10.5%)   | 10,337 (13.1%)  | 11,786 (13.9%)  |                              |
| ≥80 years                                          | 15,661 (6.3%)    | 873 (2.6%)      | 2,800 (5.5%)    | 5,557 (7.1%)    | 6,431 (7.6%)    |                              |

\*Total number of deaths present the overall cause of deaths.

<sup>†</sup>The denominator for percentage of number of deaths due to suicide was total number of deaths.

<sup>‡</sup>The number and percentage of death due to suicide by sex and age group were presented among people aged ≥ 10 years old.

<sup>§</sup> The number and percentage of death due to suicide by sex and age group were presented among people aged ≥ 10 years old.

<sup>¶</sup>Chi-square test was used to test the differences in the number of deaths by sex and age group

**Table 2.** The number of death from suicide, suicide rates from 1993 to 2016 in South Korea

| Year | Population | Number of suicide death | Age-standardized suicide rate* |
|------|------------|-------------------------|--------------------------------|
| 1993 | 44,752,157 | 4,208                   | 10.7                           |
| 1994 | 45,208,726 | 4,277                   | 10.7                           |
| 1995 | 45,637,184 | 4,930                   | 12.1                           |
| 1996 | 46,062,143 | 5,959                   | 14.4                           |
| 1997 | 46,475,163 | 6,068                   | 14.5                           |
| 1998 | 46,837,620 | 8,622                   | 20.4                           |
| 1999 | 47,163,425 | 7,056                   | 16.5                           |
| 2000 | 47,534,117 | 6,444                   | 14.9                           |
| 2001 | 47,877,049 | 6,911                   | 15.7                           |
| 2002 | 48,125,745 | 8,612                   | 19.2                           |
| 2003 | 48,308,386 | 10,898                  | 23.7                           |
| 2004 | 48,485,314 | 11,492                  | 24.6                           |
| 2005 | 48,683,040 | 12,011                  | 25.1                           |
| 2006 | 48,887,027 | 10,653                  | 21.7                           |
| 2007 | 49,130,354 | 12,174                  | 24.3                           |
| 2008 | 49,404,648 | 12,858                  | 25.1                           |
| 2009 | 49,656,756 | 15,412                  | 29.5                           |
| 2010 | 49,879,812 | 15,566                  | 29.1                           |
| 2011 | 50,111,476 | 15,906                  | 29.1                           |
| 2012 | 50,345,325 | 14,160                  | 25.3                           |
| 2013 | 50,558,952 | 14,427                  | 25.3                           |
| 2014 | 50,763,158 | 13,836                  | 24.0                           |
| 2015 | 50,951,719 | 13,513                  | 22.8                           |
| 2016 | 51,112,972 | 13,092                  | 21.9                           |

\*Age-standardized rates were expressed per 100,000 people and Korean mid-year population in year 2005 was used for age-standardization.

Data was obtained from Statistics Korea (Available from: <http://kosis.kr/>)

**Table 3.** Joinpoint regression analysis for suicide rate from 1993 to 2016 in Korean by age group

| Categories      | Suicide rate |        | Trend 1   |                         | Trend 2   |                          | Trend 3   |                           | Trend 4   |                          |
|-----------------|--------------|--------|-----------|-------------------------|-----------|--------------------------|-----------|---------------------------|-----------|--------------------------|
|                 | 1993         | 2016   | Years     | APC (95% CI)            | Years     | APC (95% CI)             | Years     | APC (95% CI)              | Years     | APC (95% CI)             |
| <b>Men</b>      |              |        |           |                         |           |                          |           |                           |           |                          |
| 10-19 years old | 5.35         | 5.57   | 1993-1998 | 4.8% (-5.2% to 16.0%)   | 1998-2001 | -14.7% (-48.4% to 40.9%) | 2001-2016 | 2.8% (0.5% to 5.2%)*      |           |                          |
| 20-29 years old | 14.44        | 19.91  | 1993-2006 | 0.5% (-1.6% to 2.7%)    | 2006-2010 | 12.1% (-7.3% to 35.6%)   | 2010-2016 | -5.8% (-11.7% to 0.5%)    |           |                          |
| 30-39 years old | 15.53        | 31.32  | 1993-2016 | 3.0% (2.1% to 4.0%)*    |           |                          |           |                           |           |                          |
| 40-49 years old | 18.39        | 42.34  | 1993-1998 | 15.6% (3.0% to 29.8%)*  | 1998-2016 | 1.9% (0.8% to 2.9%)*     |           |                           |           |                          |
| 50-59 years old | 23.92        | 48.32  | 1993-2004 | 8.0% (4.6% to 11.5%)*   | 2004-2016 | -0.2% (-1.9% to 1.6%)    |           |                           |           |                          |
| 60-69 years old | 26.58        | 55.74  | 1993-2005 | 10.7% (7.8% to 13.7%)*  | 2005-2016 | -3.6% (-5.5% to -1.7%)*  |           |                           |           |                          |
| 70-79 years old | 34.38        | 90.32  | 1993-2004 | 12.9% (9.9% to 16.0%)*  | 2004-2011 | 1.2% (-2.2% to 4.7%)     | 2011-2016 | -7.5% (-11.2% to -3.5%)*  |           |                          |
| ≥80 years old   | 41.74        | 150.52 | 1993-2000 | 9.2% (2.3% to 16.7%)*   | 2000-2003 | 29.7% (-3.3% to 74.0%)*  | 2003-2010 | 0.9% (-2.4% to 4.3%)      | 2010-2016 | -6.2% (-8.8% to -3.6%)*  |
| <b>Women</b>    |              |        |           |                         |           |                          |           |                           |           |                          |
| 10-19 years old | 3.01         | 4.15   | 1993-1998 | 14.4% (5.2% to 24.3%)*  | 1998-2001 | -21.4% (-47.0% to 16.6%) | 2001-2009 | 8.0% (2.3% to 14.0%)*     | 2009-2016 | -5.1% (-10.0% to -0.0%)* |
| 20-29 years old | 6.97         | 12.46  | 1993-1998 | 10.0% (-1.3% to 22.5%)  | 1998-2001 | -14.8% (-47.7% to 38.8%) | 2001-2008 | 19.9% (12.0% to 28.5%)*   | 2008-2016 | -9.5% (-13.3% to -5.6%)* |
| 30-39 years old | 8.07         | 17.65  | 1993-2006 | 5.0% (3.2% to 6.8%)*    | 2006-2009 | 20.8% (-4.4% to 52.5%)   | 2009-2016 | -5.9% (-8.9% to -2.8%)*   |           |                          |
| 40-49 years old | 7.57         | 16.47  | 1993-2010 | 6.5% (5.4% to 7.7%)*    | 2010-2016 | -3.3% (-6.8% to 0.3%)    |           |                           |           |                          |
| 50-59 years old | 5.47         | 16.35  | 1993-2010 | 6.6% (5.0% to 8.2%)*    | 2010-2016 | -5.5% (-8.6% to 0.0%)    |           |                           |           |                          |
| 60-69 years old | 9.10         | 14.65  | 1993-2005 | 9.4% (7.5% to 11.4%)*   | 2005-2010 | 0.7% (-5.4% to 7.3%)     | 2010-2016 | -8.7% (-11.9% to -5.5%)*  |           |                          |
| 70-79 years old | 12.19        | 26.50  | 1993-2004 | 13.5% (11.0% to 16.1%)* | 2004-2011 | -1.5% (-4.6% to 1.7%)    | 2011-2016 | -9.9% (-13.9% to -5.8%)*  |           |                          |
| ≥80 years old   | 17.21        | 45.73  | 1993-2004 | 18.0% (14.3% to 21.8%)* | 2004-2011 | -1.3% (-5.1% to 2.5%)    | 2011-2016 | -11.5% (-15.8% to -6.9%)* |           |                          |



1  
2  
3  
4  
5 Joinpoint regression model is used to test that age-standardized rates have significantly changed. The trends in suicide mortality rates were summarized as APC (annual percentage change).

6 Age-standardized rates were expressed per 100,000 men and Korean mid-year population in year 2005 was used for age-standardization.

7 APC: annual percentage change, CI: confidence interval.

8 \**p*-value <0.05  
9  
10  
11  
12  
13  
14  
15  
16  
17  
18  
19  
20  
21  
22  
23  
24  
25  
26  
27  
28  
29  
30  
31  
32  
33  
34  
35  
36  
37  
38  
39  
40  
41  
42  
43  
44  
45  
46  
47

For peer review only

1  
2  
3  
4  
5 **Figure legends**  
6

7  
8 **Figure 1.** Trends in age-standardized suicide rates in South Korea, 1993-2016  
9

10 Footnotes:

11 APC=Annual percent change

12  
13 The age-standardized suicide rates are presented as suicide death cases per 100,000 people using Korean mid-year population in 2005 as  
14 standard population.  
15

16 Joinpoint regression analysis was used to determine whether there were significant changes in trends in age-standardized suicide rates for the  
17 period between 1993 and 2016.  
18

19 \*p<0.05  
20  
21  
22  
23

24 **Figure 2.** Implementation of National Suicide Prevention Program and Plan  
25

26 Footnotes:

27  
28 The age-standardized suicide rates are presented as connected line from 1993 to 2016.  
29

30 Each number represents the year in which the major events related to national suicide prevention program or plan were occurred.  
31  
32  
33  
34  
35  
36  
37  
38  
39  
40  
41  
42  
43  
44  
45  
46  
47

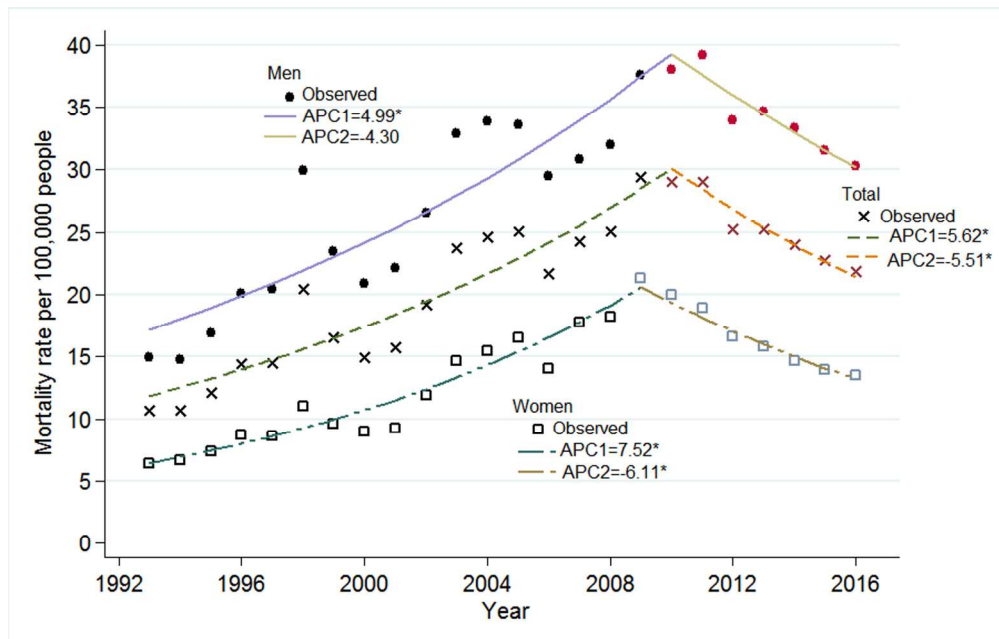

Figure 1. Trends in age-standardized suicide rates in South Korea, 1993-2016

141x90mm (300 x 300 DPI)

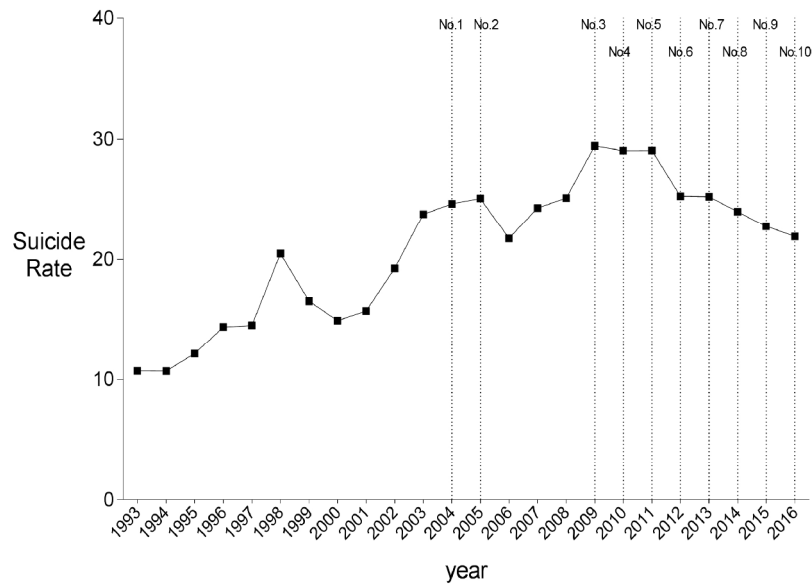

| No. | Year | National suicide prevention program or plan                                                                                                                    |
|-----|------|----------------------------------------------------------------------------------------------------------------------------------------------------------------|
| 1   | 2004 | The establishment of the first 5-year National Strategy for Suicide Prevention                                                                                 |
| 2   | 2005 | Suicide prevention program was introduced into regional mental welfare centers                                                                                 |
| 3   | 2009 | The establishment of the second 5-year National Strategy for Suicide Prevention                                                                                |
| 4   | 2010 | The establishment of integrated welfare system<br>The expansion of the basic living subsidies<br>The increase in the number of welfare officers                |
| 5   | 2011 | The enactment of the Act on Preventing Suicide<br>The inhibition of sales of paraquat pesticides                                                               |
| 6   | 2012 | The enforcement of the Act on Preventing Suicide<br>The introduction of the Korean gatekeeper program for suicide prevention entitled "Watch, Listen and Talk" |
| 7   | 2013 | The introduction of management of emergency department based suicide attempts<br>The certification of private suicide prevention                               |
| 8   | 2014 | The collaboration the government with religious organizations<br>The establishment of the Korea Psychological Autopsy Center                                   |
| 9   | 2015 | The expansion of screen door on the subway<br>"Are you okay" campaign                                                                                          |
| 10  | 2016 | The establishment of the comprehensive national mental health care strategy<br>"Air kiss" campaign                                                             |

Figure 2. Implementation of National Suicide Prevention Program and Plan

190x275mm (300 x 300 DPI)

STROBE Statement—Checklist of items that should be included in reports of *cohort studies*

|                           | Item No | Recommendation                                                                                                                                                                                                                                                                                                         | Page No                                                             |
|---------------------------|---------|------------------------------------------------------------------------------------------------------------------------------------------------------------------------------------------------------------------------------------------------------------------------------------------------------------------------|---------------------------------------------------------------------|
| <b>Title and abstract</b> | 1       | (a) Indicate the study's design with a commonly used term in the title or the abstract<br>(b) Provide in the abstract an informative and balanced summary of what was done and what was found                                                                                                                          | p.1,2<br>p.2-4                                                      |
| <b>Introduction</b>       |         |                                                                                                                                                                                                                                                                                                                        |                                                                     |
| Background/rationale      | 2       | Explain the scientific background and rationale for the investigation being reported                                                                                                                                                                                                                                   | p.5                                                                 |
| Objectives                | 3       | State specific objectives, including any prespecified hypotheses                                                                                                                                                                                                                                                       | p.5<br>line 18-21                                                   |
| <b>Methods</b>            |         |                                                                                                                                                                                                                                                                                                                        |                                                                     |
| Study design              | 4       | Present key elements of study design early in the paper                                                                                                                                                                                                                                                                | p.1,2,7                                                             |
| Setting                   | 5       | Describe the setting, locations, and relevant dates, including periods of recruitment, exposure, follow-up, and data collection                                                                                                                                                                                        | p.6<br>Line 1-10                                                    |
| Participants              | 6       | (a) Give the eligibility criteria, and the sources and methods of selection of participants. Describe methods of follow-up<br>(b) For matched studies, give matching criteria and number of exposed and unexposed                                                                                                      | p.6<br>Line 1-10<br>-                                               |
| Variables                 | 7       | Clearly define all outcomes, exposures, predictors, potential confounders, and effect modifiers. Give diagnostic criteria, if applicable                                                                                                                                                                               | p.6<br>Line 9-10, 17-24                                             |
| Data sources/measurement  | 8*      | For each variable of interest, give sources of data and details of methods of assessment (measurement). Describe comparability of assessment methods if there is more than one group                                                                                                                                   | p.6<br>Line 17-24                                                   |
| Bias                      | 9       | Describe any efforts to address potential sources of bias                                                                                                                                                                                                                                                              | p.16<br>Line 10-21                                                  |
| Study size                | 10      | Explain how the study size was arrived at                                                                                                                                                                                                                                                                              | p.8<br>Line 10-15                                                   |
| Quantitative variables    | 11      | Explain how quantitative variables were handled in the analyses. If applicable, describe which groupings were chosen and why                                                                                                                                                                                           | p.7<br>Line 9-12                                                    |
| Statistical methods       | 12      | (a) Describe all statistical methods, including those used to control for confounding<br>(b) Describe any methods used to examine subgroups and interactions<br>(c) Explain how missing data were addressed<br>(d) If applicable, explain how loss to follow-up was addressed<br>(e) Describe any sensitivity analyses | p.7<br>Line 8-8<br>p.8<br>Line 5<br>p.7<br>Line 9-12<br>-<br>-<br>- |
| <b>Results</b>            |         |                                                                                                                                                                                                                                                                                                                        |                                                                     |
| Participants              | 13*     | (a) Report numbers of individuals at each stage of study—eg numbers potentially eligible, examined for eligibility, confirmed eligible, included in the study, completing follow-up, and analysed<br>(b) Give reasons for non-participation at each stage                                                              | p.8<br>Line 9-14<br>-                                               |

|                          |     |                                                                                                                                                                                                                                                                                                                                                                                                                       |                                                                    |
|--------------------------|-----|-----------------------------------------------------------------------------------------------------------------------------------------------------------------------------------------------------------------------------------------------------------------------------------------------------------------------------------------------------------------------------------------------------------------------|--------------------------------------------------------------------|
|                          |     | (c) Consider use of a flow diagram                                                                                                                                                                                                                                                                                                                                                                                    | -                                                                  |
| Descriptive data         | 14* | (a) Give characteristics of study participants (eg demographic, clinical, social) and information on exposures and potential confounders<br><br>(b) Indicate number of participants with missing data for each variable of interest<br><br>(c) Summarise follow-up time (eg, average and total amount)                                                                                                                | p.8<br>Line 9-14<br><br>-<br><br>p.8<br>Line 10                    |
| Outcome data             | 15* | Report numbers of outcome events or summary measures over time                                                                                                                                                                                                                                                                                                                                                        | p.8<br>Line 10-14                                                  |
| <b>Main results</b>      |     |                                                                                                                                                                                                                                                                                                                                                                                                                       |                                                                    |
| Main results             | 16  | (a) Give unadjusted estimates and, if applicable, confounder-adjusted estimates and their precision (eg, 95% confidence interval). Make clear which confounders were adjusted for and why they were included<br><br>(b) Report category boundaries when continuous variables were categorized<br><br>(c) If relevant, consider translating estimates of relative risk into absolute risk for a meaningful time period | p.8<br>Line 22-<br>p.10 Line 23<br><br>p.7<br>Line 9-12<br>Table 2 |
| Other analyses           | 17  | Report other analyses done—eg analyses of subgroups and interactions, and sensitivity analyses                                                                                                                                                                                                                                                                                                                        | -                                                                  |
| <b>Discussion</b>        |     |                                                                                                                                                                                                                                                                                                                                                                                                                       |                                                                    |
| Key results              | 18  | Summarise key results with reference to study objectives                                                                                                                                                                                                                                                                                                                                                              | p.11 Line 23-<br>p.12 Line 5                                       |
| Limitations              | 19  | Discuss limitations of the study, taking into account sources of potential bias or imprecision. Discuss both direction and magnitude of any potential bias                                                                                                                                                                                                                                                            | p.4 Line 10-11<br>p.17<br>Line 11-23                               |
| Interpretation           | 20  | Give a cautious overall interpretation of results considering objectives, limitations, multiplicity of analyses, results from similar studies, and other relevant evidence                                                                                                                                                                                                                                            | p.12 Line 9-<br>p.17 Line 9                                        |
| Generalisability         | 21  | Discuss the generalisability (external validity) of the study results                                                                                                                                                                                                                                                                                                                                                 | p.12 Line 5-7<br>p.17 Line 24-<br>p.18 Line 8                      |
| <b>Other information</b> |     |                                                                                                                                                                                                                                                                                                                                                                                                                       |                                                                    |
| Funding                  | 22  | Give the source of funding and the role of the funders for the present study and, if applicable, for the original study on which the present article is based                                                                                                                                                                                                                                                         | p.18<br>Line 21-23                                                 |

\*Give information separately for exposed and unexposed groups.

**Note:** An Explanation and Elaboration article discusses each checklist item and gives methodological background and published examples of transparent reporting. The STROBE checklist is best used in conjunction with this article (freely available on the Web sites of PLoS Medicine at <http://www.plosmedicine.org/>, Annals of Internal Medicine at <http://www.annals.org/>, and Epidemiology at <http://www.epidem.com/>). Information on the STROBE Initiative is available at <http://www.strobe-statement.org>.
